# Supplementary material for: Neighbourhood physical environment influences on children’s outdoor play: a systematic review
Source: Frontiers journal article supplement (doi:10.3389/fbuil.2023.1193309), 2023-06-27
Supplement: Data_Sheet_1.xlsx [file Data_Sheet_1.xlsx]

## Sheet: scopus (573)原始
备注	environment	play	child	neighbourhood	duplicated	Abstract	作者	title	year	source	DOI	key words	publication	author
	y	y	y	y		Proper use of colors, as an essential element of children's playground, can result in a more appropriate environment for children. Therefore, the current study evaluates the impact of Hue, Saturation, and Value (HSV) colors on preschool children's preferences at the ages of 5 and 6. 16 color palettes and 2 playground scenes were presented to children in order to identify their preferences. Result…	Mousavi Samimi P., Sadraei Tabatabaei N.	Preschool children's indoor and outdoor playground HSV color preferences	2022	Color Research and Application	10.1002/col.22759	environmental color preference; HSV; indoor playground; outdoor playground; preschool children		Mousavi Samimi, P., Sadraei Tabatabaei, N.
	y	n	y	y		This study aimed to analyze the association between the practice of different types of physical activity (PA) with perceived environmental factors in boys and girls adolescents. Were evaluated 1,130 adolescents from Porto Alegre, Brazil. To evaluate different PA, students answered whether or not they practiced walking, running, team sports, and others general PA. Perceived environmental factors w…	Dias A.F., Fochesatto C.F., Crochemore-Silva I., Brand C., Mota J., Gaya A.R., Gaya A.C.A.	Team sports, running, walking: activity-specific associations with perceived environmental factors in adolescents	2022	Ciencia & saude coletiva	10.1590/1413-81232022275.12812021			Dias, A.F., Fochesatto, C.F., Crochemore-Silva, I., (...), Gaya, A.R., Gaya, A.C.A.
	y	n	n	n		INTRODUCTION: The provision of shade at outdoor recreation sites such as playgrounds confers a variety of public health benefits. It can prevent overexposure to solar ultraviolet radiation, and, in turn, protect against skin cancer. Further, shade mitigates heat and may promote physical activity. In this study, we evaluate and describe the amount, type and use of shade at public playgrounds. METH…	Cimino A., McWhirter J.E., Papadopoulos A.	An evaluation of the amount, type and use of shade at public playgrounds in Guelph, Ontario, Canada [Évaluation de la superficie, du type et de la fréquentation des zones ombragées des terrains de jeu à Guelph (Ontario, Canada)]	2022	Health promotion and chronic disease prevention in Canada : research, policy and practice	10.24095/hpcdp.42.5.04	child health; environmental health; health equity; play and playthings; prevention and control; public health	Scopus	Cimino, A., McWhirter, J.E., Papadopoulos, A.
	y	n	y	y		The environmental influences on early childhood development are understudied. The association between vegetation cover (i.e., trees, shrubs, grassed areas) in four key behaviour settings and socioemotional functioning was investigated in 1196 young children (2–5 years). Emotional difficulties were inversely associated with vegetation cover in the home yard (OR: 0.81 [0.69—0.96]) and neighbourhood…	Mygind L., Elsborg P., Schipperijn J., Boruff B., Lum J.A.G., Bølling M., Flensborg-Madsen T., Bentsen P., Enticott P.G., Christian H.	Is vegetation cover in key behaviour settings important for early childhood socioemotional function? A preregistered, cross-sectional study	2022	Developmental Science	10.1111/desc.13200	daycare; kindergarten; nature; outdoor play; socioecology; wellbeing	Scopus	Mygind, L., Elsborg, P., Schipperijn, J., Boruff, B., Lum, J.A.G., Bølling, M., Flensborg-Madsen, T., Bentsen, P., Enticott, P.G., Christian, H.
	n	n	y	y		Aim: Internalising symptoms and disorders often emerge in childhood and are associated with negative health outcomes into adulthood. Studies have shown neighbourhood characteristics (e.g. socio-economic composition, greenspace exposure) to be associated with depression and anxiety symptoms in adults; however, research that explores these relationships longitudinally in children is lacking. This s…	Naya C.H., Yi L., Chu D., Dunton G.F., Mason T.B.	Cross-sectional and longitudinal associations of park coverage, greenness exposure and neighbourhood median household income with children's depressive and anxiety symptoms	2022	Journal of Paediatrics and Child Health	10.1111/jpc.15809	anxiety; child; depression; psychiatry/mental health; residential neighbourhood characteristic	Scopus	Naya, C.H., Yi, L., Chu, D., Dunton, G.F., Mason, T.B.
	y	y	y	n		Green open space (GOS) is an important outdoor resource for the well-being of children by providing places for physical activity (PA), especially in the highly urbanized environment. The COVID-19 lockdowns have made children have more sedentary time than before due to less access to public places. This article aims to examine the associations of GOS characteristics (environmental and surrounding)…	Ma M., Adeney M., Chen W., Deng D., Tan S.	To Create a Safe and Healthy Place for Children: The Associations of Green Open Space Characteristics With Children's Use	2022	Frontiers in Public Health	10.3389/fpubh.2021.813976	children; design; environmental characteristics; green open space; landscape; physical activity; planning	Scopus	Ma, M., Adeney, M., Chen, W., Deng, D., Tan, S.
	y	y	y	y		Children are often the most disadvantaged cohort during miserable situations of natural disaster, economic crisis, and environmental degradation. Meanwhile, children’s play is increasingly controlled, costly, and standardized with engineered structures and surfaces rather than infused with natural processes and organic materials. Access to nature-based playscapes in underserved neighborhoods is e…	Zhang Y., Tamminga K., Wu H.	Interweaving Computational and Tacit Knowledge to Design Nature-Based Play Networks in Underserved Communities	2022	Land	10.3390/land11030350	GIS; Green play infrastructure; Nature-based play; Suitability mapping; Tacit knowledge; Underserved neighborhood	Scopus	Zhang, Y., Tamminga, K., Wu, H.
	n	n	y	n		Background/aims: The association between social adversity and externalizing behavioral problems in children is well-documented. What is much less researched are biological mechanisms that may mediate such relationships. This study examines the hypothesis that low blood lead mediates the relationship between social adversity and child externalizing behavior problems. Methods: In this cross-section…	Liu J., Portnoy J., Raine A., Gladieux M., McGarry P., Chen A.	Blood lead levels mediate the relationship between social adversity and child externalizing behavior	2022	Environmental Research	10.1016/j.envres.2021.112396	Adverse child experiences (ACEs); Child behavior; Externalizing behavior; Lead exposure; Mediation; Social adversity	Scopus	Liu, J., Portnoy, J., Raine, A., Gladieux, M., McGarry, P., Chen, A.
	y	n	y	y		Background: Early life environments may influence children's blood pressure (BP), but evidence on the combined effects of natural and built environment exposures is scarce. The present study investigates the associations of natural and built environment indicators, traffic noise, and air pollution with BP in children living in Alpine valleys. Methods: In 2004/2005, 1251 school children (8–12 year…	Dzhambov A.M., Lercher P., Markevych I., Browning M.H.E.M., Rüdisser J.	Natural and built environments and blood pressure of Alpine schoolchildren	2022	Environmental Research	10.1016/j.envres.2021.111925	Air pollution; CVD; Green space; Greenness; Grey space; Traffic noise	Scopus	Dzhambov, A.M., Lercher, P., Markevych, I., Browning, M.H.E.M., Rüdisser, J.
	y	n	n	y		Purpose: This paper will identify people's experience of visiting selected neighborhood parks and their overall evaluations of selected neighborhood parks. The study is notably done by gathering data from the residents based on their neighborhood parks' experiences, including the landscape features and facilities related to their experiences. Design/methodology/approach: The Likert scale question…	Ishak S.A., Jamaludin A.A., Hussein H.	User's experience of neighborhood parks in Taman Tun Dr Ismail and Bandar Tun Razak, Kuala Lumpur	2022	Open House International	10.1108/OHI-06-2020-0058	Experience; Kuala Lumpur; Neighborhood parks; Park usage	Scopus	Ishak, S.A., Jamaludin, A.A., Hussein, H.
可以引用	n	y	y	y		Purpose: To investigate the compliance rates of health-related behaviors among Chinese preschool children, and to explore how supportive family environment, parental behavior, sociodemo-graphic and community factors affect children’s health-related behavior comprehensively. Method: Preschool children aged 3 to 6 years were chosen from 5760 villages (residential) committees from 471 counties (dist…	Gao W., Zhang Y., Wu D., Dong Y., Liu N., Wang H.	Compliance with Health-Related Behaviors Guidelines and Its Relationship with Multiple Factors in Preschool Children Aged 3–6 Years: A National Cross-Sectional Survey in China	2022	International Journal of Environmental Research and Public Health	10.3390/ijerph19031262	Moderate to vigorous physical activity; Parental behavior factors; Preschool children; Screen time behavior; Sleep behavior; Supportive family environmental factors	Scopus	Gao, W., Zhang, Y., Wu, D., Dong, Y., Liu, N., Wang, H.
两个	y	y	y	y		Regular participation in physical activity is essential for children’s physical, mental, and cognitive health. Neighborhood environments may be especially important for children who are more likely to spend time in the environment proximal to home. This article provides an update of evidence for associations between children’s physical activity behaviors and objectively assessed environmental cha…	Smith M., Mavoa S., Ikeda E., Hasanzadeh K., Zhao J., Rinne T.E., Donnellan N., Kyttä M., Cui J.	Associations between Children’s Physical Activity and Neighborhood Environments Using GIS: A Secondary Analysis from a Systematic Scoping Review	2022	International Journal of Environmental Research and Public Health	10.3390/ijerph19031033	Active travel; Adolescent; Children’s geographies; Cycling; Geographic information systems; Health geography; MVPA; Play; Walking; Youth	Scopus	Smith, M., Mavoa, S., Ikeda, E., Hasanzadeh, K., Zhao, J., Rinne, T.E., Donnellan, N., Kyttä, M., Cui, J.
	y	y	y	y		This systematic review discusses 25 recent studies (from 2000 to 2019, 13 quantitative and 12 qualitative) on the associations between neighbourhood characteristics and outdoor play of children (7–14 years old). Both physical and social contexts are shown to influence outdoor play, though studies differ on which elements matter most. Play-friendly environments with informal and safe opportunities…	Visser K., van Aalst I.	Neighbourhood Factors in Children's Outdoor Play: A Systematic Literature Review	2022	Tijdschrift voor Economische en Sociale Geografie	10.1111/tesg.12505	children; global north; literature review; neighbourhoods; outdoor play; urban areas	Scopus	Visser, K., van Aalst, I.
	n	n	y	n		As the global climate crisis escalates, environmental disaster and extreme weather will play a defining role in the lives of many of today's children, particularly those from impoverished communities and communities of color. However, environmental children's literature has overwhelmingly failed to educate readers about environmental injustice or equip them with the tools to combat these pressing…	Anderson B.	“Earth Girl Won't Stand For It!”: Representations of Environmental (In)Justice in Mayah's Lot (2012)	2022	Comics Grid: Journal of Comics Scholarship	10.16995/cg.6552		Scopus	Anderson, B.
无全文	y	y	y	y		Twenty-first-century population growth is raising the need for more land space in urban areas and this has led to the construction of high-rise buildings, reducing horizontal urban development and making construction of residential high-rise buildings (RHB) a necessity in major cities around the world. In this regard, urban density and high-rise construction are key factors when determining a cit…	Maleki B., Casanovas-Rubio M.D.M., Fuente Antequera A.D.L.	Sustainability assessment in residential high-rise building design: state of the art	2022	Architectural Engineering and Design Management	10.1080/17452007.2022.2060931	residential high-rise buildings; surrounding environment; Sustainability indicators; sustainable development; urban density	Scopus	Maleki, B., Casanovas-Rubio, M.D.M., Fuente Antequera, A.D.L.
无全文	y	y	y	y		Much research about children's play as a tool for navigating social worlds and difficult circumstances describes individuals or small groups of children playing synchronously, frequently in school or lab settings. Fewer studies consider the possibilities of asynchronous outdoor play, the topic of this paper. Drawing from a series of photographs generated in the first months of the COVID-19 pandem…	Brownell C.J.	Navigating play in a pandemic: examining children’s outdoor neighborhood play experiences	2022	International Journal of Play	10.1080/21594937.2022.2042932	childhood; COVID-19; neighborhood; outdoor play; Play	Scopus	Brownell, C.J.
	n	n	y	n		Purpose: This study was designed to assess the efficiency of a French version of GraphoGame (GG) against an equally engaging math intervention (Fiete Math, FM) in a large school sample of children from socioeconomically disadvantaged neighborhoods in grade 1 (N = 921). Method: The intervention was implemented in two different cohorts who used GG or FM for about four months four times a week for 3…	Lassault J., Sprenger-Charolles L., Albrand J.-P., Alavoine E., Richardson U., Lyytinen H., Ziegler J.C.	Testing the Effects of GraphoGame Against a Computer-Assisted Math Intervention in Primary School	2022	Scientific Studies of Reading	10.1080/10888438.2022.2052884		Scopus	Lassault, J., Sprenger-Charolles, L., Albrand, J.-P., Alavoine, E., Richardson, U., Lyytinen, H., Ziegler, J.C.
	n	n	n	n		Introduction. Heavy metal pollution of soils in urban areas is a severe problem in many regions of Russia and other countries. The higher concentrations of heavy metals in playground soils represent a severe threat to children's health. The lack of legislatively approved decisions on periodic monitoring of soil contamination in residential areas and on remediation measures does not ensure a favou…	Ushakova E.S., Karavaeva T.I., Puzik A.Yu., Volkova M.A., Belkin P.A.	Assessment of soil contamination at playgrounds in residential areas [Оценка загрязнённости почв детских площадок на территории жилых районов]	2022	Gigiena i Sanitariya	10.47470/0016-9900-2022-101-1-14-20	heavy metals; playgrounds; soil contamination; soil quality standards	Scopus	Ushakova, E.S., Karavaeva, T.I., Puzik, A.Yu., Volkova, M.A., Belkin, P.A.
	y	n	y	y		The time spent in sleep, sedentary behavior, and physical activity form a 24-hour movement behavior composition. The objective was to identify neighborhood physical environment features associated with multiple components of the movement behavior composition among 10 to 13-year-olds. Twenty-three neighborhood physical environment features were measured in 1 km buffers from the participantsʻ homes…	Campbell J.E., Janssen I.	The neighborhood physical environment and the 24-hour movement behavior composition among children	2022	International Journal of Environmental Health Research	10.1080/09603123.2022.2041562	child; environment; Physical activity; sedentary behavior; sleep	Scopus	Campbell, J.E., Janssen, I.
	n	n	y	n		With more low-income children in the United States participating in center-based early childhood education programs than ever before, understanding the features of preschool classrooms that promote positive and equitable outcomes for children is of increasing concern to education researchers. Relatively little empirical work, however, has considered the role that characteristics outside of presch…	MCCoy D.C., Sabol T.J., Wei W., Busby A., Hanno E.C.	Pushing the Boundaries of Education Research: A Multidimensional Approach to Characterizing Preschool Neighborhoods and Their Relations With Child Outcomes	2022	Journal of Educational Psychology	10.1037/edu0000728	Early childhood development; Institutional resources; School neighborhood	Scopus	MCCoy, D.C., Sabol, T.J., Wei, W., Busby, A., Hanno, E.C.
	y	y	y	y		Studies of reduced children's outdoor activity show that home range was the most important place for Children's Independent Mobility (CIM). The relationship between the characteristics of home range with CIM was investigated. But the research hypothesis is that CIM was not limited alone to the affordance of the environment around the home, and housing characteristics also influenced the child's t…	Bagheri H., Zarghami E.	Assessing the relationship between housing characteristics and children's independent mobility by PPGIS method	2022	Journal of Housing and the Built Environment	10.1007/s10901-021-09928-8	Children's independent mobility; Housing; Neighborhood; PPGIS	Scopus	Bagheri, H., Zarghami, E.
	y	y	y	n		To identify features parents perceived as being relevant for their child’s active play, their own active recreation, and their coactivity. Parents (n = 145, M age = 36.2 years) with preschoolers (M age = 3.9 years) living in Edmonton, Canada were recruited from each of Edmonton’s council wards. Parents reported demographic information and the importance of several neighborhood features (destinati…	Hunter S., Leatherdale S.T., Spence J.C., Carson V.	Perceived Relevance of Neighborhood Features for Encouraging Preschoolers’ Active Play, Parents’ Active Recreation, and Parent–Child Coactivity	2022	Canadian Journal of Behavioural Science	10.1037/cbs0000304	Correlates; Early years; Environment; Physical activity	Scopus	Hunter, S., Leatherdale, S.T., Spence, J.C., Carson, V.
	y	n	y	y		Early-life exposure to neighborhood violence can negatively affect children's socioemotional development and long-term health outcomes. Community-level interventions that modify the built environment to facilitate social encounters can have a positive impact on health. An example of such interventions is the building of green spaces and playgrounds. This case study describes collaboration among r…	Vidal C., Lyman C., Brown G., Hynson B.	Reclaiming public spaces: The case for the built environment as a restorative tool in neighborhoods with high levels of community violence	2022	Journal of Community Psychology	10.1002/jcop.22783		Scopus	Vidal, C., Lyman, C., Brown, G., Hynson, B.
	y	y	y	n		A cross-sectional study was designed to evaluate the relationship between the availability and proximity to parks and playgrounds and physical activity (PA). Moreover, the accessibility to parks and playgrounds and its association with active commuting to/from school (ACS) and body mass index (BMI) were analyzed. The sample was composed of children aged 6–12 years old from the BEACH (Built Enviro…	Molina-García J., Menescardi C., Estevan I., Queralt A.	Associations between park and playground availability and proximity and children’s physical activity and body mass index: The beach study	2022	International Journal of Environmental Research and Public Health	10.3390/ijerph19010250	Active commuting to school; Body mass index; Environment design; Green spaces; Neighborhood; Obesity; Parks; Physical activity; Playgrounds; Walkability	Scopus	Molina-García, J., Menescardi, C., Estevan, I., Queralt, A.
	y	n	y	n		We evaluated the epidemiological evidence on the built environment and its link to childhood obesity, focusing on environmental factors such as traffic noise and air pollution, as well as physical factors potentially driving obesity-related behaviors, such as neighborhood walkability and availability and accessibility of parks and playgrounds. Eligible studies were (i) conducted on human children…	Malacarne D., Handakas E., Robinson O., Pineda E., Saez M., Chatzi L., Fecht D.	The built environment as determinant of childhood obesity: A systematic literature review	2022	Obesity Reviews	10.1111/obr.13385		Scopus	Malacarne, D., Handakas, E., Robinson, O., Pineda, E., Saez, M., Chatzi, L., Fecht, D.
	y	y	y	y		This paper explores children’s (aged 7–16) outdoor play in terms of location preference, usage pattern, and accessibility range of play spaces in three neighbourhoods in Dhaka. Data were collected through a survey of children and their respective parents, interviews with children, and observation of play activities in 21 play spaces. Analytical results reveal diverse geographies of children’s out…	Bhuyan M.R.	Geographies of outdoor play in Dhaka: an explorative study on children’s location preference, usage pattern, and accessibility range of play spaces	2022	Children's Geographies	10.1080/14733285.2021.1914823	accessibility; Children’s play spaces; Dhaka; location preference; outdoor play; usage pattern	Scopus	Bhuyan, M.R.
	y	y	y	n		Local play parks are key spaces within children’s geographies providing opportunities for physical activity, socialisation and a connection with their local community. The design of these key neighbourhood facilities influences their use; extending beyond accessibility and installation of equipment when seeking to create a location with usability for all. This paper reports on the development of …	Parker R., Al-Maiyah S.	Developing an integrated approach to the evaluation of outdoor play settings: rethinking the position of play value	2022	Children's Geographies	10.1080/14733285.2021.1912294	Children’s geographies; children’s play spaces; inclusion; play; playground	Scopus	Parker, R., Al-Maiyah, S.
	n	n	y	y		This article is a critical interpretive study of residential group homes as school preparatory environments for children and youth in their care. Utilizing social pedagogic analytics, the paper analyzes the role of residential group homes in the education of the children and youth under their care. Evidence gathered in this study suggests that residential child and youth care staff does not play …	Hwami M.	The Corporate Parent: Residential Group Homes and the Education of Children and Youth in Care	2022	Child Care in Practice	10.1080/13575279.2019.1680530	children and youth in care; Corporate parent; residential child and youth workers; residential group homes; school achievement; social pedagogy	Scopus	Hwami, M.
	y	y	y	y		Background: The home environment is the most important location in young children’s lives, yet few studies have examined the relationship between the outdoor home environment and child physical activity levels, and even fewer have used objectively measured exposures and outcomes. This study examined relationships between objectively assessed home yard size and greenness, and child physical activi…	Oakley J., Peters R.L., Wake M., Grobler A.C., Kerr J.A., Lycett K., Cassim R., Russell M., Sun C., Tang M.L.K., Koplin J.J., Mavoa S.	Backyard benefits? A cross-sectional study of yard size and greenness and children’s physical activity and outdoor play	2021	BMC Public Health	10.1186/s12889-021-11475-4	Built environment; Children; Greenness; Physical activity, outdoor play; Yard	Scopus	Oakley, J., Peters, R.L., Wake, M., Grobler, A.C., Kerr, J.A., Lycett, K., Cassim, R., Russell, M., Sun, C., Tang, M.L.K., Koplin, J.J., Mavoa, S.
	n	n	n	n		Purpose: The present study was conducted to evaluate the carcinogenic and non-carcinogenic hazards of polychlorinated biphenyls (PCBs) in topsoil across business districts, public green space, cultural and educational areas, and roadside and residential areas in city of Tehran, in 2019. Method: A total of 30 surface urban soil specimens were collected and after preparing them in the laboratory, P…	Ranjbaran S., Sobhanardakani S., Cheraghi M., Lorestani B., Sadr M.K.	Ecological and human health risks assessment of some polychlorinated biphenyls (PCBs) in surface soils of central and southern parts of city of Tehran, Iran	2021	Journal of Environmental Health Science and Engineering	10.1007/s40201-021-00705-x	Chromatography; Health risks assessment; Land use; Polychlorinated biphenyls	Scopus	Ranjbaran, S., Sobhanardakani, S., Cheraghi, M., Lorestani, B., Sadr, M.K.
	n	n	n	n		Little is known about the early-life cardiovascular health impacts of fine particulate air pollution (PM2.5) and oxidant gases. A repeated-measures panel study was used to evaluate associations between outdoor PM2.5 and the combined oxidant capacity of O3 and NO2 (using a redox-weighted average, Ox) and retinal vessel diameter and blood pressure in children living in a region impacted by resident…	Korsiak J., Perepeluk K.-L., Peterson N.G., Kulka R., Weichenthal S.	Air pollution and retinal vessel diameter and blood pressure in school-aged children in a region impacted by residential biomass burning	2021	Scientific Reports	10.1038/s41598-021-92269-x		Scopus	Korsiak, J., Perepeluk, K.-L., Peterson, N.G., Kulka, R., Weichenthal, S.
	n	n	n	n		The geography of education literature has demonstrated remarkable similarities in school choice strategies across different educational and spatial contexts. The literature finds that school choice strategies of the middle classes rely on deploying different forms of capital (economic, social, and cultural). At the same time, it is evident that the specific geography and institutional idiosyncras…	Boterman W.R.	Socio-spatial strategies of school selection in a free parental choice context	2021	Transactions of the Institute of British Geographers	10.1111/tran.12454	educational landscape; gentrification; middle class; school choice; school segregation	Scopus	Boterman, W.R.
	y	n	n	n		Background: The growth of geolocated data has opened the door to a wealth of new research opportunities in the health fields. One avenue of particular interest is the relationship between the spaces where people spend time and their health outcomes. This research model typically intersects individual data collected on a specific cohort with publicly available socioeconomic or environmental aggreg…	Folch D.C., Fowler C.S., Mikaelian L.	Day time, night time, over time: geographic and temporal uncertainty when linking event and contextual data	2021	Environmental Health: A Global Access Science Source	10.1186/s12940-021-00734-x	Neighborhood effects; Space-time; Uncertainty	Scopus	Folch, D.C., Fowler, C.S., Mikaelian, L.
	y	n	y	n		Background: Physical activity has many health benefits for children and adolescents. However, the prevalence of physical inactivity in school-aged children and adolescents remains high in China. Many factors impact the levels of moderate and vigorous physical activity (MVPA) among students. This study investigated the factors associated with students’ MVPA levels and the determinants of changes i…	Huang W., Shi X., Wang Y., Li X., Gao P., Lu J., Zhuang J.	Determinants of student’s physical activity: a 12-month follow-up study in Ningxia province	2021	BMC Public Health	10.1186/s12889-021-10525-1	Adolescent; Children; Neighbourhood environment; Physical activity; School environment	Scopus	Huang, W., Shi, X., Wang, Y., Li, X., Gao, P., Lu, J., Zhuang, J.
	n	n	n	n		Objective To assess the association between the physical activity level and the built environment by accessibility, microinfrastructure and security in Latin America (LA). Design We conducted a multicentre cross-sectional study to collect physical activity and built environment data. The levels of physical activity were calculated through the International Physical Activity Questionnaire survey. …	Barreno M., Sisa I., Yépez Garciá M.C., Shen H., Villar M., Kovalskys I., Fisberg M., Gomez G., Rigotti A., Cortés L.Y., Pareja R.G., Herrera-Cuenca M., Guajardo V.	Association between built environment and physical activity in Latin American countries: A multicentre cross-sectional study	2021	BMJ Open	10.1136/bmjopen-2020-046271	epidemiology; health policy; public health	Scopus	Barreno, M., Sisa, I., Yépez Garciá, M.C., Shen, H., Villar, M., Kovalskys, I., Fisberg, M., Gomez, G., Rigotti, A., Cortés, L.Y., Pareja, R.G., Herrera-Cuenca, M., Guajardo, V.
	y	n	n	n		Urban parks are essential for communities to maintain and improve health, culture, and quality of life. However, Ulaanbaatar, the capital of Mongolia, faces a shortage of urban parks due to overpopulation and unplanned land use. A good community-based strategy can help urban park planners and decision-makers understand residents’ needs. It can also improve livability and the urban environmental c…	Enkhbold B., Matsui K.	Community perceptions about participating in urban park establishment in Ulaanbaatar city, Mongolia	2021	Land	10.3390/land10111268	Community perception and participation; Ger residents; Ulaanbaatar city; Urban park establishment and maintenance	Scopus	Enkhbold, B., Matsui, K.
	y	n	n	n		High-school students tested soil, paint, and water for lead (Pb) in a total of 80 houses in their town of Pelham, New York, where blood-Pb data indicate relatively high levels of child exposure. All the samples were tested in the laboratory using established procedures but this was preceded by testing of soil and paint in the field with a kit by the students. The total Pb concentration in 32 of t…	Sefchick E.M., Dusevic D., Dougherty J.R., Terraciano A., Ellis T., van Geen A.	Testing Homes for Potential Sources of Lead Exposure as a High-School Science Project	2021	GeoHealth	10.1029/2021GH000498		Scopus	Sefchick, E.M., Dusevic, D., Dougherty, J.R., Terraciano, A., Ellis, T., van Geen, A.
	y	n	y	y		This cross-sectional study investigated regional differences in outdoor playtime and screen time among preschool-age children in Japan, and their associations with environmental factors, in order to identify the modifiable determinants of the differences between urban and rural areas. Data were obtained from the “Eat, be active, and sleep well” study. Children from three (n = 872) and five (n = 7…	Wang Q., Ma J., Harada K., Kobayashi S., Sano H., Kim H.	Associations among outdoor playtime, screen time, and environmental factors in japanese preschoolers: The ‘eat, be active, and sleep well’ study	2021	Sustainability (Switzerland)	10.3390/su132212499	Environment; Outdoor play; Preschool-age children; Screen time; Urban/rural	Scopus	Wang, Q., Ma, J., Harada, K., Kobayashi, S., Sano, H., Kim, H.
	n	n	y	n		Parental perceptions and use of neighborhood facilities are important factors that are related to children’s dietary intake and physical activity. The aim of this study was to examine the association between neighborhood deprivation index, parents’ perceptions of their neighborhood environment, and healthy/unhealthy markers of child dietary intake, physical activity, and TV screen time. This cros…	Bassul C., Corish C.A., Kearney J.M.	Associations between neighborhood deprivation index, parent perceptions and preschooler lifestyle behaviors	2021	Children	10.3390/children8110959	Children dietary intake; Children physical activity; Deprivation index; Neighborhood environment; Parents’ perceptions; Pre-school children; TV screen time	Scopus	Bassul, C., Corish, C.A., Kearney, J.M.
	y	y	y	n		Environmental settings influence children’s and adolescents’ physical activity (PA) in neighborhoods and schoolyards. This study aimed to explore the main characteristics of schoolyards in six Nordic–Baltic countries, to document how those facilities provide affordances for PA in 7–18 year–old schoolchildren, and how the schoolyard meets children’s preferences. One schoolyard was studied in each …	Rutkauskaite R., Gisladottir T., Pihu M., Kjonniksen L., Lounassalo I., Huovinen T., Gruodyte‐raciene R., Visagurskiene K., Olafson O., Kull M., Rudzinska I., Fjørtoft I.	Schoolyard affordances for physical activity: A pilot study in 6 nordic–baltic countries	2021	Sustainability (Switzerland)	10.3390/su132111640	Affordances; Design; Physical activity; Pupils; Schoolyard	Scopus	Rutkauskaite, R., Gisladottir, T., Pihu, M., Kjonniksen, L., Lounassalo, I., Huovinen, T., Gruodyte‐raciene, R., Visagurskiene, K., Olafson, O., Kull, M., Rudzinska, I., Fjørtoft, I.
	y	n	n	y		Use of parks is important for the healthy ageing of older adults as it is associated with substantial physical, mental and social health benefits. However, parks are generally underused by older adults, and we know little about which physical environmental factors influence their use of parks. This study uses interviews to qualitatively explore the physical environmental factors of parks that inf…	Kou R., Hunter R.F., Cleland C., Ellis G.	Physical environmental factors influencing older adults’ park use: A qualitative study	2021	Urban Forestry and Urban Greening	10.1016/j.ufug.2021.127353	Go pro camera; Park features; Park use; Sedentary interviews; Walking interviews	Scopus	Kou, R., Hunter, R.F., Cleland, C., Ellis, G.
	y	y	y	n		Insufficient physical activity (PA) among most children and adolescents is a global problem that is undermining the realisation of numerous developmental and health benefits. The aim of this study was to explore the potential impact of interventions on PA by using an agent-based model (ABM) simulating children's daily activities in an urban environment. Three domains for interventions were explor…	Almagor J., Martin A., McCrorie P., Mitchell R.	How can an agent-based model explore the impact of interventions on children's physical activity in an urban environment?	2021	Health and Place	10.1016/j.healthplace.2021.102688	Agent-based model; Children; Complex systems; Physical activity; Urban environment	Scopus	Almagor, J., Martin, A., McCrorie, P., Mitchell, R.
检查是否在社区	y	y	y	y		Play benefits childhood development and well-being, and is a key factor in sustainable city design. Though previous studies have examined the effects of various urban features on how much children play and where they play, such studies rely on quantitative measurements of play such as the precise location of play and the duration of play time, while people's subjective feelings regarding the play…	Kruse J., Kang Y., Liu Y.-N., Zhang F., Gao S.	Places for play: Understanding human perception of playability in cities using street view images and deep learning	2021	Computers, Environment and Urban Systems	10.1016/j.compenvurbsys.2021.101693	Built environment; Deep learning; Human perception of place; Playability; Street view images	Scopus	Kruse, J., Kang, Y., Liu, Y.-N., Zhang, F., Gao, S.
	y	n	y	y		Against the background of the solution-defying incidence of child labourers in Nigerian cities, this study examined the relationship between public spaces and incidence of child labourers in Ibadan Municipality, Nigeria. Data were obtained through direct counting of child labourers and cursory observation of the physical and environmental compositions of their places of operation. The direct coun…	Taiwo A.O., Badiora A.I., Adebara T.M.	Public Spaces and Concentrations of Child Labourers in Ibadan Municipality, Nigeria	2021	Journal of Asian and African Studies	10.1177/0021909620988747	child labour; Ibadan; Land use; public space; street children	Scopus	Taiwo, A.O., Badiora, A.I., Adebara, T.M.
	n	n	y	y		The school building sector has a pivotal role to play in the transition to a low carbon UK economy. School buildings are responsible for 15% of the country's public sector carbon emissions, with space heating currently making up the largest proportion of energy use and associated costs in schools. Children spend a large part of their waking life in school buildings. There is substantial evidence …	Schwartz Y., Godoy-Shimizu D., Korolija I., Dong J., Hong S.M., Mavrogianni A., Mumovic D.	Developing a Data-driven school building stock energy and indoor environmental quality modelling method	2021	Energy and Buildings	10.1016/j.enbuild.2021.111249	Energy benchmarking; Energy Consumption in Schools; Energy Efficiency; IEQ in Schools; School Stock Modelling; Schools in England	Scopus	Schwartz, Y., Godoy-Shimizu, D., Korolija, I., Dong, J., Hong, S.M., Mavrogianni, A., Mumovic, D.
	n	n	y	y		Purpose: While previous research underscores the important role that neighborhood contexts play for child and adolescent health and well-being, how these neighborhood contexts influence substance use initiation among adolescents from low-income and ethnic minority families has been understudied. Methods: This study is a secondary analysis of data from the Denver Child Study a retrospective survey…	Lee E., Santiago A.M.	Cumulative exposure to neighborhood conditions and substance use initiation among low-income latinx and african american adolescents	2021	International Journal of Environmental Research and Public Health	10.3390/ijerph182010831	Adolescence; Cumulative risk and resilience; Neighborhood social disorder; Substance use initiation	Scopus	Lee, E., Santiago, A.M.
	y	n	y	n		BACKGROUND: Schools are often located near traffic sources, leading to high levels of exposure to traffic-related air pollutants, including black carbon (BC). Thus, the school environment could play in a significant role in the adverse respiratory health of children. OBJECTIVES: Our objective was to determine associations between personal BC levels at school and airway inflammation [i.e., fractio…	Jung K.H., Goodwin K.E., Perzanowski M.S., Chillrud S.N., Perera F.P., Miller R.L., Lovinsky-Desir S.	Personal exposure to black carbon at school and levels of fractional exhaled nitric oxide in new york city	2021	Environmental Health Perspectives	10.1289/EHP8985		Scopus	Jung, K.H., Goodwin, K.E., Perzanowski, M.S., Chillrud, S.N., Perera, F.P., Miller, R.L., Lovinsky-Desir, S.
亲社会	y	y	y	y		Potential pathways linking green space quality to prosocial behaviour have not been investigated so far. This study aimed to examine 15 candidate mediators of the association between green space quality and prosocial behaviour across physical activity, social interaction, health-related quality of life (HRQOL), child and caregiver mental health. This study analysed data of 4969 children aged 4−5 …	Putra I.G.N.E., Astell-Burt T., Cliff D.P., Vella S.A., Feng X.	Do physical activity, social interaction, and mental health mediate the association between green space quality and child prosocial behaviour?	2021	Urban Forestry and Urban Greening	10.1016/j.ufug.2021.127264	Health-related quality of life; Nature; Physical activity; Prosociality; Social contacts; Total difficulties score	Scopus	Putra, I.G.N.E., Astell-Burt, T., Cliff, D.P., Vella, S.A., Feng, X.
农村与城市活动场地的差异	y	n	y	y		Disparities in physical activity-related behaviors among rural and non-rural adolescents are important to consider given the relatively recent concerns surrounding the health of rural populations. Differences in rural and non-rural environments may facilitate or hinder physical activity opportunities. The purpose of this study is to examine differences between non-rural and rural adolescents’ mod…	Christiana R.W., Bouldin E.D., Battista R.A.	Active living environments mediate rural and non-rural differences in physical activity, active transportation, and screen time among adolescents	2021	Preventive Medicine Reports	10.1016/j.pmedr.2021.101422	Built environment; Exercise; Sedentary behaviour; Urban; Youth	Scopus	Christiana, R.W., Bouldin, E.D., Battista, R.A.
	n	n	y	n		The current COVID-19 pandemic has disrupted daily behaviours of children and youth. Yet, little is known about how they are mentally coping with the pandemic-time changes to their lives. This study explores children and youths’ self-reported subjective well-being (SWB) during the pandemic, and provides novel insights into the correlates of potential decrease, using data from a pan-Canadian online…	Mitra R., Waygood E.O.D., Fullan J.	Subjective well-being of Canadian children and youth during the COVID-19 pandemic: The role of the social and physical environment and healthy movement behaviours	2021	Preventive Medicine Reports	10.1016/j.pmedr.2021.101404	Child and adolescent health; COVID-19 pandemic; Emotional health; Physical activity; Screen time; Social-ecological environment; Subjective well-being	Scopus	Mitra, R., Waygood, E.O.D., Fullan, J.
	y	n	y	y		Urban outdoor play spaces are reported to improve children's health. However, there is little empirical evidence on the impact of outdoor play spaces on childhood mental and behavioral health. To fill this gap, we investigated the associations between residential proximity to outdoor play spaces and the prevalence of diagnosed mental and behavioral disorders. We explored whether these association…	Pérez-del-Pulgar C., Anguelovski I., Cole H.V.S., de Bont J., Connolly J., Baró F., Díaz Y., Fontán-Vela M., Duarte-Salles T., Triguero-Mas M.	The relationship between residential proximity to outdoor play spaces and children's mental and behavioral health: The importance of neighborhood socio-economic characteristics	2021	Environmental Research	10.1016/j.envres.2021.111326	Childhood mental and behavioral health; Disorders of psychological development; Green space; Play space; Urban environment	Scopus	Pérez-del-Pulgar, C., Anguelovski, I., Cole, H.V.S., de Bont, J., Connolly, J., Baró, F., Díaz, Y., Fontán-Vela, M., Duarte-Salles, T., Triguero-Mas, M.
	n	n	n	n		The concentrations of the sixteen United States Environmental Protection Agency polycyclic aromatic hydrocarbons (PAHs) were determined in dusts from different land-use types in Benin City by means of gas chromatography–mass spectrometry. The results obtained were used to assess the ecological and human health risk and to determine the source apportionment. The Ʃ16 PAH concentrations in dusts fro…	Iwegbue C.M.A., Kekeke E.F., Tesi G.O., Olisah C., Egobueze F.E., Chukwu-Madu E., Martincigh B.S.	Impact of Land-Use Types on the Distribution and Exposure Risk of Polycyclic Aromatic Hydrocarbons in Dusts from Benin City, Nigeria	2021	Archives of Environmental Contamination and Toxicology	10.1007/s00244-021-00861-z		Scopus	Iwegbue, C.M.A., Kekeke, E.F., Tesi, G.O., Olisah, C., Egobueze, F.E., Chukwu-Madu, E., Martincigh, B.S.
	y	n	y	y		This article explores children's understanding of the role that neighbourhood plays in their health and well-being. Whilst evidence exists on the relationship between the environment and children's health, we have little knowledge of this from the perspective of children themselves. Children's experiences are all too frequently researched through the eyes of adults. Following a Rights of the Chil…	Shortt N.K., Ross C.	Children's perceptions of environment and health in two Scottish neighbourhoods	2021	Social Science and Medicine	10.1016/j.socscimed.2021.114186	Children's health; Health inequalities; Place-based stigma; Rights of the child; Social exclusion	Scopus	Shortt, N.K., Ross, C.
	y	n	n	n		In city agglomerations significant pollution results from fossil fuel combustion from heat and power plants, transportation, and boilers in households. In this context, pollution from recalcitrant, environmentally accumulative metal(loid)s can be a critical human health risk. In day-care centers, playgrounds, kindergartens, schools, and sport facility areas children may ingest significant quantit…	Różański S.Ł., Castejón J.M.P., McGahan D.G.	Child risk assessment of selected metal(loid)s from urban soils using in vitro UBM procedure	2021	Ecological Indicators	10.1016/j.ecolind.2021.107726	Bioaccessibility; Heavy metals; Pollution; Risk assessment; Urban soils	Scopus	Różański, S.Ł., Castejón, J.M.P., McGahan, D.G.
	n	n	y	y		Neighborhood disadvantage and community violence are common in poor, urban communities and are risk factors for emotional dysfunction. Emotional processes are supported by neural circuitry that includes the prefrontal cortex (PFC), hippocampus, amygdala, and hypothalamus. These brain regions are connected by white matter pathways that include the cingulum bundle, uncinate fasciculus, stria termin…	Bell K.L., Purcell J.B., Harnett N.G., Goodman A.M., Mrug S., Schuster M.A., Elliott M.N., Emery S.T., Knight D.C.	White Matter Microstructure in the Young Adult Brain Varies with Neighborhood Disadvantage in Adolescence	2021	Neuroscience	10.1016/j.neuroscience.2021.05.012	adolescence; diffusion weighted imaging; family income; violence exposure	Scopus
待查	y	y	y	y		Introduction Neighbourhood environments can have significant and enduring impacts on children's physical, psychological and social health. Environments can impact health through promoting or hindering physical activity, active travel, and healthy eating in addition to opportunities for social interaction, cognitive development, rest and relaxation. There is a paucity of research that has examined…	Egli V., Mandic S., Pocock T., Narayanan A., Williams L., Clark T., Spasic L., Wilson A., Witten K., Smith M., Smith M.	Understanding children's perceptions of, and priorities for, healthy neighbourhoods in Aotearoa New Zealand: Study protocol for a cross-sectional study	2021	BMJ Open	10.1136/bmjopen-2020-047368	community child health; health policy; public health	Scopus
	y	n	n	n		The COVID-19 pandemic is a global threat presenting health, economic, and social challenges that continue to escalate. Metapopulation epidemic modeling studies in the susceptible–exposed–infectious–removed (SEIR) style have played important roles in informing public health policy making to mitigate the spread of COVID-19. These models typically rely on a key assumption on the homogeneity of the p…	Hou X., Gao S., Li Q., Kang Y., Chen N., Chen K., Rao J., Ellenberg J.S., Patz J.A.	Intracounty modeling of COVID-19 infection with human mobility: Assessing spatial heterogeneity with business traffic, age, and race	2021	Proceedings of the National Academy of Sciences of the United States of America	10.1073/pnas.2020524118	Data assimilation; Human mobility; Neighborhood disparities; Spatial epidemiology; Stochastic COVID-19 spread modeling	Scopus
	n	n	y	n		Background: Attention processes may play a central role in shaping trajectories of socioemotional development. Individuals who are clinically anxious or have high levels of trait anxiety sometimes show attention biases to threat. There is emerging evidence that young children also demonstrate a link between attention bias to salient stimuli and broad socioemotional profiles. However, we do not ha…	Pérez-Edgar K., LoBue V., Buss K.A., Field A.P., The LAnTs Team	Study Protocol: Longitudinal Attention and Temperament Study	2021	Frontiers in Psychiatry	10.3389/fpsyt.2021.656958	anxiety; attention; EEG; eye-tracking; infancy; longitudinal; temperament	Scopus
	n	y	y	y		Purpose: The purpose of this study was to explore parent perceptions of changes in child physical activity during COVID-19 stay-at-home orders. Design: A cross-sectional study. Setting: The research team used social media, relevant organizations, and neighborhood groups to distribute the survey link in May and June of 2020. Subjects: A convenience sample of parents of children aged 5–12. Measures…	Eyler A.A., Schmidt L., Kepper M., Mazzucca S., Gilbert A., Beck A.	Parent Perceptions of Changes in Child Physical Activity During COVID-19 Stay-At-Home Orders	2021	Frontiers in Public Health	10.3389/fpubh.2021.637151	barriers; children; COVID-19; environment; parenting; physical activity; social	Scopus
	y	y	y	y		Serious attention and investments are being made by local, regional, and national organizations into policies and programs geared toward reconnecting children with nature to enhance children's well-being and the well-being of the planet. However, this attention and investment commonly focuses on access to, or time in, nature, rather than on nature connectedness, despite evidence consistently supp…	Passmore H.-A., Martin L., Richardson M., White M., Hunt A., Pahl S.	Parental/Guardians' Connection to Nature Better Predicts Children's Nature Connectedness than Visits or Area-Level Characteristics	2021	Ecopsychology	10.1089/eco.2020.0033	Children; Green space; Nature connectedness; Nature contact; Nature visits; Neighborhood deprivation	Scopus
	n	n	y	y		In Sweden, the family centre is a meeting place for families in a neighbourhood. It is a place for families to meet and exchange experiences and is a confidence-filled place for preschool children to play and develop. The staff at the family centre collaborate on early prevention strategies to promote health. Since 2014, the Public Dental Health Service in Södra Ryd, Skövde, has been a collaborat…	Alm A., Falk L.L., Bremer T.W., Idholt G., Gustafsson M., Bergström E.-K.	Parents’ experiences of participating in health-promoting activities at a family centre for preschool children in Sweden	2021	Community Dental Health	10.1922/CDH_00150Alm05	Family; Family centre; Health promotion; Phenomenography; Preschool children	Scopus
	n	n	n	n		Developmental theorists have made strong claims about the fundamental prosocial or aggressive nature of the human infant. However, only rarely have prosocial behavior and aggression been studied together in the same sample. We charted the parallel development of both behaviors from infancy to childhood in a British community sample, using a two-construct, multimethod longitudinal design. Data wer…	Hay D.F., Paine A.L., Perra O., Cook K.V., Hashmi S., Robinson C., Kairis V., Slade R.	Prosocial and Aggressive Behavior: A Longitudinal Study	2021	Monographs of the Society for Research in Child Development	10.1111/mono.12427		Scopus
	n	n	y	n		Background: Ambient air pollution may play a role in childhood obesity development, but evidence is scarce, and the modifying role of socioeconomic status (SES) is unclear. We aimed to examine the association between exposure to air pollution during early childhood and subsequent risk of developing overweight and obesity, and to evaluate whether SES is a modifier of this association. Methods: Thi…	de Bont J., Díaz Y., de Castro M., Cirach M., Basagaña X., Nieuwenhuijsen M., Duarte-Salles T., Vrijheid M.	Ambient air pollution and the development of overweight and obesity in children: a large longitudinal study	2021	International Journal of Obesity	10.1038/s41366-021-00783-9		Scopus
	n	n	y	y		Background: Current evidence from studies on green space and child prosocial behaviour suggests a paucity of studies investigating the plausible role of green space quality in shaping the development of prosocial behaviour. This study aimed to examine longitudinal association between green space quality and prosocial behaviour among children. Methods: We analysed 10-year longitudinal data (2004–2…	Putra I.G.N.E., Astell-Burt T., Cliff D.P., Vella S.A., Feng X.	Association between green space quality and prosocial behaviour: A 10-year multilevel longitudinal analysis of Australian children	2021	Environmental Research	10.1016/j.envres.2020.110334	Child behaviour; Environment; Longitudinal data; Nature; Prosociality	Scopus
	y	n	y	y		Background and Objectives: Neighborhood environments may play a role in the development of child obesity by providing or limiting opportunities for children to be physically active and access healthy food near the home. This study quantifies associations between the neighborhood built and social environment and age- and sex- standardized body mass index (BMI) z-scores in a predominantly African A…	Daniels K.M., Lê-Scherban F., Schinasi L.H., Moore K., Auchincloss A.H., Forrest C.B., Roux A.V.D.	Cross-sectional associations of built and social neighborhood environment variables with body mass index in a large sample of urban predominantly african american children	2021	Childhood Obesity	10.1089/chi.2020.0155	body mass index; child obesity; electronic health record; greenness; neighborhood environment; walkability	Scopus
	y	y	y	y		Outdoor play and independent, neighborhood activity, both linked with healthy childhood development, have declined dramatically among Western children in recent decades. This study examines how social, cultural and environmental factors may be hindering children’s outdoor and community-based play. A comprehensive survey was completed by 826 children (aged 10–13 years) and their parents from 12 sc…	Loebach J., Sanches M., Jaffe J., Elton-Marshall T.	Paving the way for outdoor play: Examining socio-environmental barriers to community-based outdoor play	2021	International Journal of Environmental Research and Public Health	10.3390/ijerph18073617	Barriers; Child-friendly communities; Community environments; Community planning; Independent mobility; Neighborhood; Outdoor play; Screen-based activity; Time outdoors	Scopus
	y	n	y	y		Background: Studies investigating the potential role of neighbourhood green space quality on the development of prosocial behaviour among children are sparse. This study aimed to investigate the longitudinal association between caregiver perceived green space quality and child prosocial behaviour, and identify potential effect modifiers of the association. Methods: This was a longitudinal study u…	Putra I.G.N.E., Astell-Burt T., Cliff D.P., Vella S.A., Feng X.	Association between caregiver perceived green space quality and the development of prosocial behaviour from childhood to adolescence: Latent class trajectory and multilevel longitudinal analyses of Australian children over 10 years	2021	Journal of Environmental Psychology	10.1016/j.jenvp.2021.101579	Child behaviour; Environment; Latent class analysis; Nature; Prosociality; Subjective measure	Scopus
	n	n	n	n		Background: Metabolic syndrome increases the risk of cardiovascular disease in adults. Antecedents likely begin in childhood and whether childhood exposure to air pollution plays a contributory role is not well understood. Objectives: To assess whether children's exposure to air pollution is associated with markers of risk for metabolic syndrome and oxidative stress, a hypothesized mediator of ai…	Mann J.K., Lutzker L., Holm S.M., Margolis H.G., Neophytou A.M., Eisen E.A., Costello S., Tyner T., Holland N., Tindula G., Prunicki M., Nadeau K., Noth E.M., Lurmann F., Hammond S.K., Balmes J.R.	Traffic-related air pollution is associated with glucose dysregulation, blood pressure, and oxidative stress in children	2021	Environmental Research	10.1016/j.envres.2021.110870	Children; HbA1c; Metabolic syndrome; Oxidative stress; Polycyclic aromatic hydrocarbons; Traffic-related air pollution	Scopus
	n	n	y	n		Childhood experiences play a profound role in conferring risk and resilience for brain and behavioral development. However, how different facets of the environment shape neurodevelopment remains largely unknown. Here we sought to decompose heterogeneous relationships between environmental factors and brain structure in 989 school-aged children from the Adolescent Brain Cognitive Development Study…	Hong S.-J., Sisk L.M., Caballero C., Mekhanik A., Roy A.K., Milham M.P., Gee D.G.	Decomposing complex links between the childhood environment and brain structure in school-aged youth	2021	Developmental Cognitive Neuroscience	10.1016/j.dcn.2021.100919	Adversity; Brain development; Childhood; Environment; Neuroanatomy; Subtyping	Scopus
	n	n	y	n		Previous studies have identified localized associations between childhood environment – namely their socio-economic status (SES) – and particular neural structures. The primary aim of the current study was to test whether associations between SES and brain structure are widespread or limited to specific neural pathways. We employed advances in whole-brain structural connectomics to address this. …	Johnson A., Bathelt J., Akarca D., Astle D.E., The RED Team	Far and wide: Associations between childhood socio-economic status and brain connectomics	2021	Developmental Cognitive Neuroscience	10.1016/j.dcn.2020.100888	behaviour; Cognitive ability; connectomics; Diffusion tensor imaging (DTI); educational attainment; Socio-economic status	Scopus
	y	n	y	n		Introduction: Tobacco presence in outdoor children's playgrounds is concerning not only because it leads to secondhand smoke (SHS) exposure, but also cigarette butt pollution and tobacco normalization. Objectives: This study aimed to assess SHS exposure in children's playgrounds, according to area-level socioeconomic status (SES), smoke-free regulations, national smoking prevalence, and SHS expos…	Henderson E., Continente X., Fernández E., Tigova O., Cortés-Francisco N., Gallus S., Lugo A., Semple S., O'Donnell R., Clancy L., Keogan S., Ruprecht A., Borgini A., Tzortzi A., Vyzikidou V.K., Gorini G., López-Nicolás A., Soriano J.B., Geshanova G., Osman J., Mons U., Przewozniak K., Precioso J., Brad R., López M.J., the TackSHS project investigators	Secondhand smoke exposure in outdoor children's playgrounds in 11 European countries	2021	Environment International	10.1016/j.envint.2020.105775	Child; Playground; Smoke-free regulations; Socioeconomic status; Tobacco smoke pollution	Scopus
	n	n	n	n		As U.S. policy and practice further constrains the prevalence of residential treatment for youth with emotional and behavior challenges, treatment foster care (TFC) placements are expected to expand and serve challenging youth who were previously receiving group care placement. Treatment foster parents play an essential role in the delivery of TFC and its potential to be a transformative and heal…	Lee B.R., Phillips D.R., Steward R.K., Kerns S.E.U.	Equipping TFC Parents as Treatment Providers: Findings from Expert Interviews	2021	Journal of Child and Family Studies	10.1007/s10826-020-01808-z	Foster parents; Professionalization; TFC competencies; Training; Treatment foster care	Scopus
	n	n	y	y		Given that physical activity (PA) plays an important role in early childhood, understanding the factors that affect the practice of PA at an early age could help develop effective strategies for overcoming barriers and increasing activity levels in this age group. A qualitative study was conducted based on grounded theory aimed at exploring the perceptions of mothers and fathers from Cuenca and C…	Alcántara-Porcuna V., Sánchez-López M., Martínez-Vizcaíno V., Martínez-Andrés M., Ruiz-Hermosa A., Rodríguez-Martín B.	Parents’ perceptions on barriers and facilitators of physical activity among schoolchildren: A qualitative study	2021	International Journal of Environmental Research and Public Health	10.3390/ijerph18063086	Attitude; Focus group; Parents; Perceptions; Physical activity; Qualitative research; Schoolchild	Scopus
	n	n	n	n		Many individuals use online platforms operated by third parties as sellers or buyers to offer and/or purchase products (e. g. eBay) and services (e. g. EatWith). Within the broad field of the sharing economy, there are peer-to-peer marketplaces in various branches such as mobility, finance, media and entertainment, hospitality, travel management or accommodation. This study focuses on the so-call…	Namberger P.	Short-term rentals in the city of Munich: Effects on residents in their own homes [Kurzzeitvermietungen in der Stadt München: Auswirkungen auf die Bewohner/-innen im eigenen Haus]	2021	Berichte Geographie und Landeskunde	10.25162/BGL-2021-0005	Airbnb; Airbnb; Bewohner/-innen; Disturbance; Kurzzeitvermietungen; Perception; Residents – Sharing Economy; Sharing Economy; Short-term rentals; Störung; Wahrnehmung	Scopus
	y	y	y	y		Although children's play environments are known to be linked to their subjective well-being (SWB), this is not a topic that has been thoroughly studied. The present article has three aims: to identify factors that can ensure an optimum play environment in relation to children's SWB; to analyze the most relevant groups of children that share similar play environments; and to focus on social inequa…	Corominas M., González-Carrasco M., Casas F.	Analyzing factors for an optimum play environment through children's subjective well-being indicators	2021	Children and Youth Services Review	10.1016/j.childyouth.2020.105688	Children's rights; Children's subjective well-being; Children's Worlds; Play environment; Social inequality	Scopus
	y	y	y	y		Despite the positive influence of environmental factors on physical activity (PA) levels of children, further investigation is necessary when considering the unique characteristics of children with autism spectrum disorder (ASD). The purpose of this study was to examine the relationship between neighborhood environment factors and PA among children with ASD by examining the extent to which (a) th…	Fiscella N.A., Case L.K., Jung J., Yun J.	Influence of Neighborhood Environment on Physical Activity Participation among Children with Autism Spectrum Disorder	2021	Autism Research	10.1002/aur.2445	autism; built environment; neighborhood; physical activity; safety; support	Scopus
	y	y	y	y		The rapid development of cities results in many public health and built-up environmental problems, which have vital impacts on children's growth environment, the development of children, and city contradictions. There is a lack of children being a main concern when constructing new urban areas or reconstructing old districts. Children's activity spaces tend to be standardized and unified (kit, fe…	Bao Y., Gao M., Luo D., Zhou X.	Effects of Children's Outdoor Physical Activity in the Urban Neighborhood Activity Space Environment	2021	Frontiers in Public Health	10.3389/fpubh.2021.631492	children; environmental characteristics; neighborhood space; physical activity; spatial characteristics	Scopus
	y	y	y	y		Children’s independent mobility (CIM) has declined dramatically in recent decades de-spite its benefits in facilitating childhood development, promoting physical activity, and combating the obesity epidemic. This US-based study examines the impacts of housing and neighborhood environments on two modes of CIM—home-based independent travel to non-school destinations and unsupervised outdoor play—wh…	Qiu L., Zhu X.	Housing and community environments vs. Independent mobility: Roles in promoting children’s independent travel and unsupervised outdoor play	2021	International Journal of Environmental Research and Public Health	10.3390/ijerph18042132	Children; Housing; Independent mobility; Independent travel; Neighborhood; Physical environment; Unsupervised outdoor play	Scopus
	y	y	y	y		While urban greenspace is increasingly recognized as important to mental health, its role in substance use is understudied. This exploratory study investigates the interaction of greenspace with peer network health, sex, and executive function (EF) in models of substance use among a sample of disadvantaged, urban youth. Adolescents and their parents were recruited from a hospital in the mid-Atlan…	Mennis J., Li X., Meenar M., Coatsworth J.D., McKeon T.P., Mason M.J.	Residential greenspace and urban adolescent substance use: Exploring interactive effects with peer network health, sex, and executive function	2021	International Journal of Environmental Research and Public Health	10.3390/ijerph18041611	Adolescents; Differential susceptibility; Environmental sus-ceptibility; Executive function; Greenspace; Mental health; Peers; Substance use	Scopus
	n	n	y	n		Scholars have determined that low socioeconomic status (SES) is associated with unhealthy dietary behaviours and that local food environments shape food inequality. Less is known about how residents' perceptions of their food environment affect their dietary behaviours. We conducted 37 semistructured interviews and 29 focus groups in three socioeconomically distinct neighbourhoods in Madrid. We i…	Rivera-Navarro J., Conde P., Díez J., Gutiérrez-Sastre M., González-Salgado I., Sandín M., Gittelsohn J., Franco M.	Urban environment and dietary behaviours as perceived by residents living in socioeconomically diverse neighbourhoods: A qualitative study in a Mediterranean context	2021	Appetite	10.1016/j.appet.2020.104983	Diet; Food environment; Neighbourhood; Qualitative research; Socioeconomic status	Scopus
需要确定是否在社区	y	y	y	y		An increasingly well-developed body of research uses neighbourhood walks to better understand primary school children's experiences of local environments, yet virtually nothing is known about preschool-aged children's connections to their neighbourhoods. A reason for this omission is the commonly held view that preschool children lack competency to reflect on lived environments beyond playgrounds…	Ergler C.R., Freeman C., Guiney T.	Walking with preschool-aged children to explore their local wellbeing affordances	2021	Geographical Research	10.1111/1745-5871.12402	affordances; children; mobilities; play; walking; wellbeing	Scopus
	y	n	n	n		Extreme heat events result in higher indoor temperatures in buildings, increased energy consumption, and more frequent health problems, mainly between the children, the elderly over 65, and vulnerable low-income people. The indoor environment plays a key role in reducing the effects of extreme heat events. While the benefits of passive cooling measures on thermal and environmental aspects are wel…	Flores-Larsen S., Filippín C.	Energy efficiency, thermal resilience, and health during extreme heat events in low-income housing in Argentina	2021	Energy and Buildings	10.1016/j.enbuild.2020.110576	Extreme heat events; Health risks; Heat index; Heat waves; Social houses	Scopus
	n	y	y	n		Objective: Parenting sensitivity and mutual parent-child attunement are key features of environments that support children’s learning and development. To-date, observational measures of these constructs have focused on children aged 2–6 years and are less relevant to the more sophisticated developmental skills of children aged 7–8 years, despite parenting being equally important at these ages. We…	Bennetts S.K., Love J., Westrupp E.M., Hackworth N.J., Mensah F.K., Nicholson J.M., Levickis P.	Protocol for the Adaptation of a Direct Observational Measure of Parent-Child Interaction for Use With 7–8-Year-Old Children	2021	Frontiers in Psychology	10.3389/fpsyg.2020.619336	measurement; observation; parent responsiveness; parent sensitivity; parent-child interaction; positive mutuality; sensitive responding	Scopus
	y	y	y	n		Access to green schoolyards (schoolyards designed with greenery and natural elements to create a park-like environment, as opposed to asphalt-based playgrounds) are associated with many benefits for students, including improvements in physical and mental health. While many studies examining these associations are cross-sectional, some feature experimental designs that offer the possibility of cau…	Bikomeye J.C., Balza J., Beyer K.M.	The impact of schoolyard greening on children’s physical activity and socioemotional health: A systematic review of experimental studies	2021	International Journal of Environmental Research and Public Health	10.3390/ijerph18020535	Child health; Experimental design; Green space; Health equity; Mental health; Nature; Physical activity; Pre-post study design; Schoolyard greening; Socioemotional health	Scopus
需要确定是否在社区和游戏，12月份才能下载全文	y	y	y	y		Drawing from two ethnographic studies of children, one in a former industrial neighbourhood in the process of demolition in Shanghai, and the other in a rural town in Guangdong, this article explores the relationships children form with the landscape of ruins as they wander about with the aim of identifying the opportunities these offer in terms of games, freedom, and sharing, etc. The article an…	Salgues C.	In the Midst of Rubble, Bordering the Wasteland: Landscapes of Ruins and Childhood Experiences in China	2021	Journal of Current Chinese Affairs	10.4000/chinaperspectives.12709	Childhood; Deleuze; Ethnography; Guangdong; Left-behind children; Migrant workers; Qualitative demography; Ruins; Shanghai; Structural geography	Scopus
	y	n	y	y		This study aims to research the expectations of users who bring their children to a park of the neighbourhood scale. For this purpose, a survey was conducted randomly with 550 people in 2018. The scope of this task encompassed research entailed questions regarding the occupation, educational status, age of the users, their relation to the children, as well as the age and gender of the children th…	Caymaz G.F.Y., Sirel A.	Expectations of Persons Accompanying Children for the Physical Environment at Ataköy 5, Klslm Children's Park	2021	Architecture and Urban Planning	10.2478/aup-2021-0011	Built environment; children behaviour; design features; neighbourhood park; parental perception; playground	Scopus
	y	y	y	y		Objective: The aim of the study is to look at the effects of climate on the way and place of childcare and their impact on children's health. Method: The method used is field exploration by observing how parents take care of their children, and measuring the temperature and humidity of the caregiver, besides looking for secondary data at the local health center regarding the level of health of in…	Asmal I., Syarif E., Amin S.	elerator	2021	Gaceta Sanitaria	10.1016/j.gaceta.2021.10.096	Child health; Childcare; Coastal climate	Scopus
是否在社区,无全文	y	y	y	y		In leisure studies, qualitative research investigating leisure experiences in underprivileged contexts has focused mainly on adults of economically developed countries. Accordingly, this article aims to determine the suitability of qualitative methods used in previous investigations, such as interviews and photo-elicitation, in addition to drawings and the creation of mock-ups, to investigate how…	Diaz-Hernandez A., Lazcano I.	‘I drew myself playing football with the clouds and the sun’: qualitative research methods to explore children’s leisure experiences in disadvantaged contexts of less economically developed countries	2021	Leisure Studies	10.1080/02614367.2021.2006276	children; informal settlements; leisure experience; lines of action; poverty; Qualitative research methods	Scopus
	n	y	y	y		The contemporary neighborhood literature discusses the complex relationships among neighborhood environments, social support, and parenting. Grounded in the Person-Process-Context-Time (PPCT) model, we examined how different sources of social support interact with Korean mothers’ perception of disorder in their neighborhoods, and if social support increases or decreases their parenting stress in …	Lee S., Chin M., Sung M.	Are neighbors and neighborhoods still important? Examining the impact of neighbors and neighborhood environments on mothers’ parenting stress	2021	Journal of Comparative Family Studies	10.3138/jcfs.52.3.02	Neighborhood disorder; Neighbors; Parenting stress; School-aged children; Social support	Scopus
	y	y	y	y		When public space is void of uses and people are deprived of making it their own, the space ceases to exist. This situation encourages architects to begin its revitalisation. The Jacob Riis Park (1966) of New York, a work by the urban landscape architect M. Paul Friedberg, enlightens us in this sense. His architectural project is a kind of laboratory in urban form with the aim of redefining the a…	Davó J.J.T.	RIIS project: A happening for social life [PROYECTO RIIS: UN HAPPENING PARA LA VIDA SOCIAL]	2021	Revista Proyecto, Progreso, Arquitectura	10.12795/ppa.2021.i25.02	Community; New York; Park; Playground; Square; Urban design	Scopus
	y	n	y	n		School connectedness, a construct indexing supportive school relationships, has been posited to promote resilience to environmental adversity. Consistent with prominent calls in the field, we examined the protective nature of school connectedness against two dimensions of early adversity that index multiple levels of environmental exposure (violence exposure, social deprivation) when predicting b…	Goetschius L.G., McLoyd V.C., Hein T.C., Mitchell C., Hyde L.W., Monk C.S.	School connectedness as a protective factor against childhood exposure to violence and social deprivation: A longitudinal study of adaptive and maladaptive outcomes	2021	Development and Psychopathology	10.1017/S0954579421001140	early adversity; latent variable modeling; longitudinal; resilience; school connectedness	Scopus
亲子环境	y	y	y	y		The birthrate in Japan is declining rapidly, which is attributed to the lack of perspective and consideration for “child-rearing” in the architecture of cities. Therefore, to gain knowledge of the measures to support child-rearing, determining factors such as how urban space is used is essential. In this study, Japanese parents were requested to send pictures of their surrounding environment. The…	Cho S., Nishide K.	Research on acceptance of child-rearing environment from the viewpoint of parent-child route selection and recognition of walking space in various urban environments in Japan	2021	Journal of Asian Architecture and Building Engineering	10.1080/13467581.2021.1971996	Child-rearing; environments; route selection; walking space	Scopus
	n	n	y	n		Mental health problems are common in childhood and tend to be more frequent in populations at risk of poverty or social exclusion (AROPE). The family environment can play a role in reducing the impact of economic hardship on these problems. The aim of this study was to assess the effect of multidimensional poverty on the mental health of children aged 7–11 years and the role of the family environ…	González L., Estarlich M., Murcia M., Barreto-Zarza F., Santa-Marina L., Simó S., Larrañaga M.I., Ruiz-Palomino E., Ibarluzea J., Rebagliato M.	Poverty, social exclusion, and mental health: the role of the family context in children aged 7–11 years INMA mother-and-child cohort study	2021	European Child and Adolescent Psychiatry	10.1007/s00787-021-01848-w	Externalizing problems; Family context; Internalizing problems; Poverty	Scopus
	n	n	y	n		The UK Department for the Environment, Food and Rural Affairs (DEFRA) commissioned research into provision of opportunities that support children and young people’s (CYP) engagement with natural environments outside school time to identify whether CYP from disadvantaged backgrounds access the opportunities available, the challenges to do so, and how provision might be optimised to improve engagem…	Waite S., Husain F., Scandone B., Forsyth E., Piggott H.	‘It’s not for people like (them)’: structural and cultural barriers to children and young people engaging with nature outside schooling	2021	Journal of Adventure Education and Outdoor Learning	10.1080/14729679.2021.1935286	barriers; children and young people; engagement; inequalities; leisure; Natural environment; nature connectedness	Scopus
	y	y	y	y		The urbanisation of cities increases the demands on, and complexity of, urban land use. Urban densification is challenging urban green space. Cities have responded to this challenge by adopting a multiple‐use strategy where different functions share space. Shrinking open space has to contain solutions for everyday functions such as bicycle parking, waste sorting, blue‐green stormwater systems, an…	Mottaghi M., Kylin M., Kopljar S., Sternudd C.	Blue‐green playscapes: Exploring children’s places in stormwater spaces in augustenborg, malmö	2021	Urban Planning	10.17645/up.v6i2.3953	Affordance; Blue‐green solutions; Children; Everyday life; Play possibilities; Urban design; Urban open space; Urban water management	Scopus
	n	n	y	n		The adverse mental health outcomes of youth in-care have been examined from a number of disciplinary perspectives. A sociological approach emphasizes the importance that environmental and social factors play in the development of mental health problems. What remains unknown is the extent to which general strain theory (GST) and self-control theory can explain the mental health outcomes of youth i…	Cullen G.J., Yule C., Walters D., O’Grady W.	Mental Health Outcomes of Youth In-Care: Investigating the Effect of General Strain and Self-control Theories	2021	Child and Adolescent Social Work Journal	10.1007/s10560-021-00748-x	Child welfare; General strain theory; Mental health; Self-control	Scopus
是否是实证	y	y	y	y		The child-friendly city concept is relatively new in India. In 1989, the United Nations endorsed a Convention on the Rights of the Child, which aimed at identifying the important services and rights for every child globally. Subsequently, several other initiatives have been undertaken by various governments at global, national, regional, and city levels, primarily focusing on providing basic serv…	Das R., Banerjee A.	Identifying the parameters for assessment of child-friendliness in urban neighborhoods in Indian cities	2021	Journal of Urban Affairs	10.1080/07352166.2020.1863815		Scopus
	n	n	y	n		Introduction Only international studies can provide the full variability of built environments and accurately estimate effect sizes of relations between contrasting environments and health-related outcomes. The aims of the International Physical Activity and Environment Study of Adolescents (IPEN Adolescent) are to estimate the strength, shape and generalisability of associations of the community…	Cain K.L., Salmon J., Conway T.L., Cerin E., Hinckson E., Mitáš J., Schipperijn J., Frank L.D., Anjana R.M., Barnett A., Dygrýn J., Islam M.Z., Molina-García J., Moran M., Wan Muda W.A.M., Oyeyemi A.L., Reis R., Santos M.P., Schmidt T., Schofield G.M., Timperio A., van Dyck D., Sallis J.F.	International physical activity and built environment study of adolescents: IPEN Adolescent design, protocol and measures	2021	BMJ Open	10.1136/bmjopen-2020-046636		Scopus
	n	n	y	n		Summary Greenspaces in school’s neighbourhood represent an important environment to promote healthy development. The aim of this study was to assess the association between the density and type of trees around schools and exhaled Nitric Oxide (NO) levels in schoolchildren. Data on 845 children from 20 primary schools in Porto was analysed. Airway inflammation was assessed by measuring exhaled NO …	Paciência I., Cavaleiro Rufo J., Ribeiro A.I., Mendes F.C., Farraia M., Silva D., Delgado L., Moreira A.	Association between the density and type of trees around urban schools and exhaled nitric oxide levels in schoolchildren	2021	European Annals of Allergy and Clinical Immunology	10.23822/EurAnnACI.1764-1489.162	Children; Environment; Exhaled nitric oxide; Greenness; School neighborhood; Tree density	Scopus
	n	n	y	n		Asthma in children poses a significant clinical and public health burden. We examined the association between reported neighborhood traffic (a proxy for traffic-related air pollution) and asthma among 855multi-racial children aged 4–8 years old who participated in the Environmental Influences on Child Health Outcomes (ECHO) cohort. We hypothesized that high neighborhood traffic density would be a…	Commodore S., Ferguson P.L., Neelon B., Newman R., Grobman W., Tita A., Pearce J., Bloom M.S., Svendsen E., Roberts J., Skupski D., Sciscione A., Palomares K., Miller R., Wapner R., Vena J.E., Hunt K.J.	Reported neighborhood traffic and the odds of asthma/asthma-like symptoms: A cross-sectional analysis of a multi-racial cohort of children	2021	International Journal of Environmental Research and Public Health	10.3390/ijerph18010243	Air pollution exposure; Asthma; Cohort; Neighborhood traffic; Racial/ethnic disparities	Scopus
	n	n	y	n		Background: Restraint and seclusion (R&S) are controversial methods of intervention aimed at protecting children from immediate harm in residential treatment centers (RTC). Previous studies have mainly focused on situational factors and youth characteristics to predict its use. Objectives: This study sought to evaluate the role other potential predictors could play in the decision to use R&S, nam…	Geoffrion S., Lamothe J., Fraser S., Lafortune D., Dumais A.	Worker and perceived team climate factors influence the use of restraint and seclusion in youth residential treatment centers: Results from a mixed-method longitudinal study	2021	Child Abuse and Neglect	10.1016/j.chiabu.2020.104825	Mixed-method; Residential treatment centers; Restraint and seclusion; Worker and perceived team climate factors	Scopus
可以引用儿童增加对自然的体验可以减少成年后对自然的负面认知	y	n	y	n		Although negative perceptions of wildlands may play a role in outdoor recreational preferences, little is known about whether childhood nature experiences change people's negative perceptions towards nature and their preferences for outdoor recreation later in life. We conducted a questionnaire survey of university students in Tokyo, Japan, to explore their disgust and fear-evoking episodes in ea…	Sugiyama N., Hosaka T., Takagi E., Numata S.	How do childhood nature experiences and negative emotions towards nature influence preferences for outdoor activity among young adults?	2021	Landscape and Urban Planning	10.1016/j.landurbplan.2020.103971	Childhood nature experience; Disgust sensitivity; Fear expectancy; Orientation of parents towards nature; Urban green space	Scopus
	n	n	y	n		Digital serious games have shown to be effective in promoting citizen engagement and social interaction. The reasons for their success are, however, unknown. This paper proposes design recommendations to support designers of serious games for meaningful social interaction, based on player preferences, needs and desires, based on literature study and a case study for which a location-based game fr…	Fonseca X., Slingerland G., Lukosch S., Brazier F.	Designing for meaningful social interaction in digital serious games	2021	Entertainment Computing	10.1016/j.entcom.2020.100385	Meaningfulness; Serious games; Social interaction	Scopus
	n	n	y	n		Zambia has one of the highest cervical cancer rates in the world. This paper explores the acceptability of the Human Papillomavirus vaccine administered in girls (9–13 years) in Zambia. A qualitative case study was conducted in two schools in Lusaka district, which participated in the pilot for the Human Papillomavirus vaccine rollout. The study revealed that community level health systems factor…	Kucheba F., Mweemba O., Matenga T.F.L., Zulu J.M.	Acceptability of the human papillomavirus vaccine in schools in Lusaka in Zambia: Role of community and formal health system factors	2021	Global Public Health	10.1080/17441692.2020.1810734	acceptability; community; health systems; vaccines	Scopus
	n	n	y	n		Environmental noise may play a role in the manifestation and severity of attention deficit/hyperactivity disorder (ADHD) symptoms, but evidence is limited. We investigated the cross-sectional associations between residential and school road traffic noise exposure and ADHD symptoms and diagnosis. The sample included n = 1710, 10–12-year-old children from the TRAILS study in The Netherlands. ADHD s…	Zijlema W.L., de Kluizenaar Y., van Kamp I., Hartman C.A.	Associations between road traffic noise exposure at home and school and ADHD in school-aged children: the TRAILS study	2021	European Child and Adolescent Psychiatry	10.1007/s00787-020-01521-8	Adolescents; Attention deficit/hyperactivity disorder; Child health; Cross-sectional study; Road traffic noise	Scopus
	n	n	n	n		The resilience and activism of marginalised urban populations have played an important role in imagining urban politics in Indian cities. Similarly, the issue of sexual violence against women in public spaces became a significant part of urban politics in the aftermath of the 2012 Delhi gang rape and murder case. However, subsequent activism and research have paid lesser attention to other pervas…	Chakraborty P.	Gendered violence, frontline workers, and intersections of space, care and agency in Dharavi, India	2021	Gender, Place and Culture	10.1080/0966369X.2020.1739004	Agency; care labour; Dharavi; frontline workers; gendered violence; urban poor neighbourhoods	Scopus
	n	n	y	y		Background: Effective place-based interventions for childhood obesity call for the recognition of the high-risk neighbourhoods and an understanding of the determinants present locally. However, such an approach is uncommon. In this study, we identified neighbourhoods with elevated prevalence of childhood obesity ('hotspots') in the Porto Metropolitan Area and investigated to what extent the socio…	Ribeiro A.I., Santos A.C., Vieira V.M., Barros H.	Hotspots of childhood obesity in a large metropolitan area: Does neighbourhood social and built environment play a part?	2021	International Journal of Epidemiology	10.1093/IJE/DYZ205	Built environment; Childhood obesity; Neighbourhoods; Socio-economic factors; Spatial analysis	Scopus
	n	n	y	n		Individual attributes have been investigated to explain sedentary behavior. However, few studies have evaluated this association at the neighborhood level. This study aimed to determine the association between screen time (ST) among adolescents and perceived neighborhood characteristics. This cross-sectional study was conducted using a multistage household survey in Vespasiano, Brazil, in 2015–20…	Parajára M.D.C., Andrade A.C.D.S., Xavier C.C., Proietti F.A., Meireles A.L.	Associations of the perceived neighborhood environment and screen time in adolescents living in a medium-sized city in Brazil: a cross-sectional study	2021	International Journal of Environmental Health Research	10.1080/09603123.2019.1703912	adolescent; environment; neighborhood; Sedentary lifestyle; urban health	Scopus
室内设计室外化	n	y	y	n		Playtime in urban cities has become an indoor activity for children due to limited access to natural outdoor environments. This product of urbanization makes the case for the introduction of biophilic design. However, playrooms are often neglected as a possibility in designing a natural space indoors. Interior designers and other specialists lack a reliable tool to identify and incorporate biophi…	Marte E., Calumpit A., de Sá Bessa B., Toledo A., Fadda R., Skoler T.	Testing Reliability of Biophilic Design Matrix Within Urban Residential Playrooms	2020	Frontiers in Psychology	10.3389/fpsyg.2020.570099	biophilia; biophilic design; Biophilic Interior Design Matrix; children; nature play; playroom; urban	Scopus
	n	n	y	n		Objective: To verify the association of lifestyle, anthropometric, sociodemographic, family and school environment indicators with the number of steps/day in children. Methods: The sample consisted of 334 children (171 boys) from nine to 11 years old. Participants used the Actigraph GT3X accelerometer to monitor the number of steps/day, moderate to vigorous physical activity (MVPA) and sedentary …	De Victo E.R., Ferrari G., Pires C.A.M., Solé D., Araújo T.L., Katzmarzyk P.T., Matsudo V.K.R.	Lifestyle and anthropometric indicators have greater associations with steps/day in boys than in girls [Indicadores de estilo de vida e antropométricos possuem maiores associações com passos/dia nos meninos do que nas meninas: ISCOLE Brasil]	2020	Revista Paulista de Pediatria	10.1590/1984-0462/2021/39/2019413	Body composition; Lifestyle; Motor activity; Pediatrics; Public health; Students	Scopus
	y	n	y	n		Orphanages have traditionally played a key role in meeting the needs of abandoned and displaced children. This is still the case in many countries like Nigeria where they provide shelter for children of all ages presenting a variety of needs. For those defined as orphaned and vulnerable, there are few alternatives and no budgetary allocations for residential provision. In this situation, the mana…	Akanle O., Ojuri A.T.	Understanding the history, needs and experiences of looked after children with African heritage: lessons from Ibadan, Nigeria	2020	Adoption and Fostering	10.1177/0308575920963392	African children in care; Ibadan; Orphanages; residential care	Scopus
	y	y	y	y		Co-participation in physical activity may be important for helping families with young children meet physical activity recommendations. Yet, little is known about what families perceive to be the benefits, barriers and facilitators of co-participation. This study explored (i) parents' perceptions about physical activity and possible benefits of family-based co-participation in physical activity, …	Hnatiuk J.A., Dwyer G., George E.S., Bennie A.	Co-participation in physical activity: Perspectives from Australian parents of pre-schoolers	2020	Health Promotion International	10.1093/heapro/daaa022	Co-participation; Parents; Physical activity; Qualitative	Scopus
	n	n	n	n		Introduction: Negative emotional reactivity and the neighborhood environment have been individually associated with marijuana use outcomes; however, less is known about whether neighborhood factors differentiate the association between negative emotional reactivity and marijuana use. The present study examined whether neighborhood risk (i.e., neighborhood problems) and protective factors (i.e., n…	Tache R.M., Rabinowitz J.A., Gepty A.A., Lambert S.F., Reboussin B.A., Reynolds M.D.	The role of negative emotional reactivity and neighborhood factors in predicting marijuana use during early adolescence	2020	Journal of Adolescence	10.1016/j.adolescence.2020.09.002	Early adolescence; Marijuana use; Neighborhood; Temperament	Scopus
	y	n	y	y		Evidence suggests that where people live, learn, work, and play affects a range of health outcomes for children and adults. Differential access to social, economic, and environmental supports puts some community members at greater risk, leading to disparities in health and well-being. The 2014 release of the For the Sake of All report highlighted persistent health disparities for African American…	Foell A., Purnell J.Q., Barth R., Witthaus M., Murphy-Watson T., Martinez S., Foley M.	Resident-Led Neighborhood Development to Support Health: Identifying Strategies Using CBPR	2020	American Journal of Community Psychology	10.1002/ajcp.12441	Community-based participatory research; Community-university partnerships; Health; Social determinants of health; Urban neighborhoods	Scopus
	n	n	y	n		Purpose: Existing evidence on relationships between school food environments and children's in-school purchases, dietary behaviors, and body composition is based on observational studies that are vulnerable to residential selection bias. Methods: This study leveraged exogenous variation in school environments generated by the natural experiment due to military parents' assignment to installations…	Richardson A.S., Nicosia N., Ghosh-Dastidar M.B., Datar A.	School Food and Beverage Availability and Children's Diet, Purchasing, and Obesity: Evidence From a Natural Experiment	2020	Journal of Adolescent Health	10.1016/j.jadohealth.2020.03.004	Body mass index; Childhood obesity; Competitive foods and beverages; School policies	Scopus
	y	n	n	y		Low Impact Developments (LIDs) employ a series of vegetative techniques to retain rainfall close to the site of origin. Although LIDs offer sustainable runoff management, these infrastructures can be considered a risk to public health due to the presence of pathogens in the runoff and human exposure to contaminated water held in and transported by LIDs. The objective of this study is to examine t…	Ishaq S., Sadiq R., Farooq S., Chhipi-Shrestha G., Hewage K.	Investigating the public health risks of low impact developments at residential, neighbourhood, and municipal levels	2020	Science of the Total Environment	10.1016/j.scitotenv.2020.140778	Gastrointestinal (GI) illness; Low impact developments (LIDs); Meta-analysis; Public health; Risk assessment	Scopus
	y	n	n	n		Background: Lead (Pb) exposure is a problem that disproportionately impacts low-income communities and communities of color. We applied a community-based participatory research approach to assess the distribution of soil Pb concentrations and related social vulnerabilities across Census tracts in Santa Ana, CA. Methods: Soil Pb samples (n = 1528) were collected by the ¡Plo-NO! Santa Ana! Lead-Fre…	Masri S., LeBrón A., Logue M., Valencia E., Ruiz A., Reyes A., Lawrence J.M., Wu J.	Social and spatial distribution of soil lead concentrations in the City of Santa Ana, California: Implications for health inequities	2020	Science of the Total Environment	10.1016/j.scitotenv.2020.140764	Children; Environmental hazards; Environmental justice; Pb exposure; Risk assessment; Urban soil	Scopus
	y	n	y	y		Objectives: The environment is believed to be key in obesity prevention, yet it is unclear how factors in the neighborhood influence weight-related behaviors. The present study aimed to investigate the influence of parental perceived environment on physical activity (PA), television (TV) time, active play and Body Mass Index (BMI) z score, and the mediating role of these weight-related behaviors …	do Carmo A.S., Rodrigues D., Nogueira H., Mendes L.L., dos Santos L.C., Gama A., Machado-Rodrigues A.M., Silva M.-R.G., Rosado-Marques V., Padez C.	Influence of parental perceived environment on physical activity, TV viewing, active play and Body Mass Index among Portuguese children: A mediation analysis	2020	American Journal of Human Biology	10.1002/ajhb.23400		Scopus
	y	y	y	y		It has been well established that gentrification can undermine access to green amenities for socially vulnerable residents through socio-cultural or physical displacement from working-class and minority neighbourhoods. However, in the growing literature on environmental gentrification, little attention has been given to the impacts of gentrification on young families and children, especially in n…	Oscilowicz E., Honey-Rosés J., Anguelovski I., Triguero-Mas M., Cole H.	Young families and children in gentrifying neighbourhoods: how gentrification reshapes use and perception of green play spaces	2020	Local Environment	10.1080/13549839.2020.1835849	Barcelona; children; community; gentrification; green space; tourism	Scopus
	y	n	y	y		Background: Allergic disease is a recognized global epidemic and a significant cause of ill health and poor quality of life. The prevalence of pollen allergy is high throughout the world, and pollen exposure itself plays a role in emergency department presentations and hospitalizations for asthma. Lung function and airway inflammation are important measures of asthma activity and control. Objecti…	Lambert K.A., Katelaris C., Burton P., Cowie C., Lodge C., Garden F.L., Prendergast L.A., Toelle B.G., Erbas B.	Tree pollen exposure is associated with reduced lung function in children	2020	Clinical and Experimental Allergy	10.1111/cea.13711	environment; epidemiology; pediatrics	Scopus
	n	n	n	n		Objective This article aims at filling some gaps in the literature regarding conditions conducive to high-quality collaborative care in youth mental health (YMH) for migrant families. It focuses on the factors that are susceptible to foster the engagement of migrant families in the services, by examining the clinical encounter, as well as sociopolitical and institutional dimensions. Methods Using…	Nadeau L., Johnson-Lafleur J., Jaimes A., Bolduc E.	Migrant families’ engagement in youth mental health collaborative care: Clinical spaces anchored within their institutional and sociopolitical context [L’engagement dans les soins en collaboration en santé mentale jeunesse pour les familles migrantes: Des lieux cliniques ancrés dans leurs contextes institutionnel et sociopolitique]	2020	Sante Mentale au Quebec	10.7202/1075386ar	Collaborative care; Engagement; Migrant; Systemic context; Youth mental health	Scopus
	n	n	y	n		The COVID-19 pandemic has created conditions which heighten risk for child abuse. As key players in times of crisis, pediatric emergency medicine providers must be equipped with the tools to recognize, respond to, and mitigate risk of child abuse. An exploration of the scientific literature, stakeholder organization reports and lay press was undertaken to understand the impact of large-scale U.S.…	Agrawal N., Kelley M.	Child Abuse in Times of Crises: Lessons Learned	2020	Clinical Pediatric Emergency Medicine	10.1016/j.cpem.2020.100801	child abuse; child abuse prevention; COVID-19; crisis; disaster	Scopus
	n	n	y	n		Background: In our modern society, physical activity (PA) is decreasing and sedentary time (ST) is increasing, especially for children from disadvantaged neighborhoods. School-based interventions to promote PA and decrease ST are therefore required among this population in order to change children's lifestyle habits. Moreover, attentional capacities and academic achievement can be enhanced by chr…	Bernal C.M.M., Lhuisset L., Fabre N., Bois J.	School-based multicomponent intervention to promote physical activity and reduce sedentary time of disadvantaged children aged 6-10 years: Protocol for a randomized controlled trial	2020	JMIR Research Protocols	10.2196/17815	Academic achievement; Attention; Children; Intervention; Physical activity; Promotion; School; Sedentary time	Scopus
	y	y	y	y		The neighborhood is a critical setting that broadly affects health, although specific mechanisms that link relationships between the neighborhood environment and indicators of health are still emerging. Children playing is a simple, but underexplored marker that may explain how the neighborhood built environment is related to a psychological sense of community. A telephone survey was conducted am…	Ross A., Wood L., Searle M.	The indirect influence of child play on the association between parent perceptions of the neighborhood environment and sense of community	2020	Health and Place	10.1016/j.healthplace.2020.102422		Scopus
	y	n	n	n		Degraded parks in disadvantaged areas are underutilized for recreation, which may impact long-term health. Using a natural experiment, we examined the effects of local government refurbishments to parks (n = 3 intervention; n = 3 comparison) in low socioeconomic areas (LSEA) of Melbourne on park use, health behavior, social engagement and psychological well-being. Amenities promoting physical act…	Dobbinson S.J., Simmons J., Chamberlain J.A., Macinnis R.J., Salmon J., Staiger P.K., Wakefield M., Veitch J.	Examining health-related effects of refurbishment to parks in a lower socioeconomic area: The shadeplus natural experiment	2020	International Journal of Environmental Research and Public Health	10.3390/ijerph17176102	Active living; Behavior change; Intervention; Low income; Neighborhood/community; Parks/trails; Public health	Scopus
社会信任对活动的促进作用	n	y	y	y		Background Most UK adolescents do not achieve recommended levels of physical activity (PA). Previous studies suggest that the social environment could contribute to inequalities in PA behaviours, but longitudinal evidence is limited. We examined whether neighbourhood trust and social support were longitudinally associated with four common forms of PA: walking to school, walking for leisure, outdo…	Berger N., Lewis D., Quartagno M., Njagi E.N., Cummins S.	Longitudinal associations between neighbourhood trust, social support and physical activity in adolescents: Evidence from the Olympic Regeneration in East London (ORiEL) study	2020	Journal of Epidemiology and Community Health	10.1136/jech-2019-213412	HEALTH BEHAVIOUR; INEQUALITIES; PHYSICAL ACTIVITY; PREVENTION; PUBLIC HEALTH; SOCIAL CAPITAL; SOCIAL COHESION; SOCIAL ENVIRONMENT; SOCIAL EPIDEMIOLOGY; SOCIAL SUPPORT; SPORT	Scopus
	y	n	n	y		Introduction: The impact of the built environment on health and wellbeing has been well demonstrated. One aspect of this is the impact of traffic on the quality of neighbourhoods, communities and wellbeing. Method: In this case study we use the temporary closure of a street to through traffic in Christchurch, New Zealand, as an opportunity to explore whether the street was used differently, to re…	Kingham S., Curl A., Banwell K.	Streets for transport and health: The opportunity of a temporary road closure for neighbourhood connection, activity and wellbeing	2020	Journal of Transport and Health	10.1016/j.jth.2020.100872	Community; Ocial interaction; Streets; Transport; Wellbeing	Scopus
	y	y	n	y		With rapid growth in the aging population around the world, the promotion of aging in place has become more significant in recent years. Many neighborhood landscape elements and features have been revealed by accumulating research findings to be critical to aging in place. However, they are usually studied separately or in small groups. Little has been done to examine the relative importance of t…	Shi S.-L.	Important Elements and Features of Neighborhood Landscape for Aging in Place: A Study in Hong Kong	2020	Frontiers in Public Health	10.3389/fpubh.2020.00316	aging in place; landscape elements and features; neighborhood; older adults; perceived importance	Scopus
	n	n	y	n		Reducing children's exposure to unhealthy food advertising is an accepted strategy to end childhood obesity. This study aimed to (i) measure children's space-time exposures to unhealthy food advertising in public outdoor spaces, using GPS and wearable cameras; and (ii) test effectiveness of banning options. We compiled data (collected July 2014-June 2015) on 138 12-year-old children in Wellington…	Liu W., Barr M., Pearson A.L., Chambers T., Pfeiffer K.A., Smith M., Signal L.	Space-time analysis of unhealthy food advertising: New Zealand children's exposure and health policy options	2020	Health Promotion International	10.1093/heapro/daz083	children; obesity; spatio-temporal analyses; unhealthy food advertising	Scopus
	n	n	n	n		Does education change people’s lives in a way that delays mortality? Or is education primarily a proxy for unobserved endowments that promote longevity? Most scholars conclude that the former is true, but recent evidence based on Danish twin data calls this conclusion into question. Unfortunately, these potentially field-changing findings—that obtaining additional schooling has no independent eff…	Halpern-Manners A., Helgertz J., Warren J.R., Roberts E.	The Effects of Education on Mortality: Evidence From Linked U.S. Census and Administrative Mortality Data	2020	Demography	10.1007/s13524-020-00892-6	Education; Mortality; Twins; United States	Scopus
	y	y	y	y		There has been increasing recognition of the importance of children's outdoor play and independent mobility for thriving children, neighbourhoods, cities and society, which has led to calls to reverse children's retreat from the street commonplace in many Western nations. We privilege the voices of children aged 10–13 living in three diverse neighbourhoods in an urban centre in Canada to examine …	Brussoni M., Lin Y., Han C., Janssen I., Schuurman N., Boyes R., Swanlund D., Mâsse L.C.	A qualitative investigation of unsupervised outdoor activities for 10- to 13-year-old children: “I like adventuring but I don't like adventuring without being careful”	2020	Journal of Environmental Psychology	10.1016/j.jenvp.2020.101460	Active transport; Child-friendly city; Independent mobility; Neighbo; Outdoor play; Playability; rhood design; u	Scopus
	n	n	n	n		Background: Pesticide exposure is suspected to play a role in the etiology of childhood leukemia (AL). Various sources of exposure have been explored, but few studies have investigated the risk of childhood AL in relation to residential exposure to agricultural pesticides. Since around 50% of France is agricultural land, with marked pesticide use, France is a suitable location to investigate for …	Coste A., Goujon S., Faure L., Hémon D., Clavel J.	Agricultural crop density in the municipalities of France and incidence of childhood leukemia: An ecological study	2020	Environmental Research	10.1016/j.envres.2020.109517	Agriculture; Childhood leukemia; Ecological study; Pesticides; Record-based study	Scopus
	n	n	y	n		This study investigated discordant reports of maternal aggression using the Fragile Families and Child Wellbeing Study (N = 1,606). Multinomial logistic regression models predicted discordant reports of hitting and shouting from child, mother, and environmental characteristics. Compared to dyads in which both mothers and children reported aggression, mothers with a college degree had higher child…	Kremer K.P., Kondis J.S., Kremer T.R.	Discordance in Reporting of Maternal Aggression: Exploring Differences by Characteristics of Children, Mothers, and Their Environments	2020	Child Maltreatment	10.1177/1077559519876033	adolescent victims; aggressive behavior; child abuse; CPS; disclosure; longitudinal research	Scopus
	n	n	n	n		Underresourced communities often have limited access to print and materials to promote children's early literacy development. Recognizing that the neighborhood is a unit of social change, organizations that engage families in early reading and learning with their children, therefore, have increasingly become part of the community landscape. Recently, efforts to promote early literacy have found f…	Neuman S.B., Portillo M., Celano D.C.	Looking for Literacy in All the Right Spaces: The Laundromat	2020	Reading Teacher	10.1002/trtr.1905	1-Early childhood; 2-Childhood; Community-based programs; Constructivism < Theoretical perspectives; Family literacy; Home-school connections < Family literacy; Language development < Oral language; Motivation/engagement; Oral language; Parental involvement < Family literacy; Program evaluation < Strategies, methods, and materials; resources < Family literacy; Sociocultural < Theoretical perspect…	Scopus
	n	n	y	y		This study examines: (1) the association between the neighborhood social environment and obesity among adolescents, (2) whether physical activity, screen time, and short sleep mediates this association, and (3) examine sex differences. Participants (n = 12,692; age 11–19 years old) came from Waves I and II of the National Longitudinal Study of Adolescent to Adult Health. Neighborhood social disor…	Saelee R., Gazmararian J.A., Haardörfer R., Suglia S.F.	Associations between the neighborhood social environment and obesity among adolescents: Do physical activity, screen time, and sleep play a role?	2020	Health and Place	10.1016/j.healthplace.2020.102380	Exercise; Pediatric obesity; Screen time; Sleep; Social environment	Scopus
	n	n	n	n		The present work is a cross-sectional study aimed at assessing the risk perception and evaluating the community outrage linked to environmental factors among a self-selected sample of citizens living in an area characterized by the presence of industrial structures of high emotional impact. An anonymous questionnaire was administered to the population by publishing a Google form URL code in local…	Dettori M., Pittaluga P., Busonera G., Gugliotta C., Azara A., Piana A., Arghittu A., Castiglia P.	Environmental risks perception among citizens living near industrial plants: A cross-sectional study	2020	International Journal of Environmental Research and Public Health	10.3390/ijerph17134870	Community outrage; Environmental health; Environmental risks perception; Risk perception	Scopus
看视频和户外活动的相关性，查看是否指出空间的特征	y	y	y	y		The purpose of this study is to identify regional differences in outdoor activity time and screen-viewing time of preschool children in urban and rural areas and to provide data on the environmental factors to identify modifiable determinants for each region. This cross-sectional study was conducted on 1772 out of 2790 children between the age of 3 to 6 years living in northern China, with their …	Wang Q., Ma J., Maehashi A., Kim H.	The associations between outdoor playtime, screen-viewing time, and environmental factors in chinese young children: The “eat, be active and sleep well” study	2020	International Journal of Environmental Research and Public Health	10.3390/ijerph17134867	Environment; Outdoor play; Preschool children; Screen-viewing time; Urban/rural	Scopus
	n	n	y	y		This article draws attention to a neglected topic in historical geography: the names children give to places that matter to them. In doing so, it seeks to make a contribution to the rapidly developing field of children's geography and to bring together two rarely connected research areas: geographical and psychological research into children's play and literary research on cartography in children…	Burchardt J.	Far away and close to home: Children's toponyms and imagined geographies, c. 1870 – c. 1950	2020	Journal of Historical Geography	10.1016/j.jhg.2020.05.005	Children's geographies; Landscapes of play; Literary cartography; Transfigurative naming	Scopus
	n	n	n	y		Early studies conclude that high-rise apartment buildings present challenges for people’s quality of life, resulting in social isolation, social annoyance and anonymity for residents. Nevertheless, empirical research into factors supporting social interaction in high-rise apartment buildings is still scarce. This study aims to investigate how often and where people in high-rise neighborhoods inte…	Nguyen L., van den Berg P., Kemperman A., Mohammadi M.	Where do people interact in high-rise apartment buildings? Exploring the influence of personal and neighborhood characteristics	2020	International Journal of Environmental Research and Public Health	10.3390/ijerph17134619	High-rise apartment buildings; Neighborhood characteristics; Personal characteristics; Social interaction; Spaces for social interaction	Scopus
	y	y	y	y		There is scarce insight into the role of the built environment for children's subjective well-being. In an attempt to increase our knowledge on this matter, we conducted a cross-sectional study comprising 23,043 children from the Norwegian Mother and Child Cohort Study. Information about children's leisure activities and their moods and feelings were linked to geospatial data on green space, faci…	Nordbø E.C.A., Raanaas R.K., Nordh H., Aamodt G.	Disentangling how the built environment relates to children's well-being: Participation in leisure activities as a mediating pathway among 8-year-olds based on the Norwegian Mother and Child Cohort Study	2020	Health and Place	10.1016/j.healthplace.2020.102360	Facilities; Green space; Mediation; Population density; Short mood and feelings questionnaire; The Norwegian mother and child cohort study	Scopus
	y	y	y	y		Background: One cause of childhood obesity is a reduction in the amount of unstructured time spent outdoors, resulting in less physical activity. Greenspaces have the potential to increase children's physical activity levels, so it is desirable to understand how to create spaces that promote visitation and activity. Objectives: We investigate the relationship between rates of obesity at ages 4 to…	Mears M., Brindley P., Baxter I., Maheswaran R., Jorgensen A.	Neighbourhood greenspace influences on childhood obesity in Sheffield, UK	2020	Pediatric Obesity	10.1111/ijpo.12629	childhood obesity; greenspace accessibility; health inequalities; neighbourhood environment; Sheffield, UK; urban greenspace	Scopus
	y	y	y	y		Mixed methods research (MMR) is useful for addressing complex and multidisciplinary urban problems. This article demonstrates an integrated MMR approach with a novel two-phase exploratory sequential design while studying play, play space, and children’s (age 7-15 years) location preference for play in three residential areas in Dhaka. We used directly administered survey and interviews in the fir…	Bhuyan M.R., Zhang Y.	A Mixed Methods Research Strategy to Study Children’s Play and Urban Physical Environments in Dhaka	2020	Journal of Mixed Methods Research	10.1177/1558689819871820	children’s play; Dhaka; exploratory sequential design; mixed methods research; urban physical environments	Scopus
	n	n	y	n		Background Identifying factors shaping knowledge of and attitudes towards tobacco products in preadolescence is a key component supporting tobacco control policies aimed at preventing smoking initiation. This study quantified exposure to tobacco retailing environments within the individual-level activity spaces of children across a socioeconomic gradient. Methods One week of global positioning sy…	Caryl F., Shortt N.K., Pearce J., Reid G., Mitchell R.	Socioeconomic inequalities in children's exposure to tobacco retailing based on individual-level GPS data in Scotland	2020	Tobacco Control	10.1136/tobaccocontrol-2018-054891	denormalization; end game; environment; prevention; socioeconomic status	Scopus
	n	n	y	n		Background: Existing literature shows that there is an inverse association between socioeconomic position and screen time among adolescents. What is less known is the mechanism behind these differences. The study aimed to explore individual, interpersonal and neighborhood environmental correlates of total screen time (TST) among adolescents and to assess their mediating role in the association be…	Gebremariam M.K., Henjum S., Terragni L., Torheim L.E.	Correlates of screen time and mediators of differences by parental education among adolescents	2020	BMC Pediatrics	10.1186/s12887-020-02181-y	Adolescents; Correlates; Mediators; Sedentary behavior; Social inequalities	Scopus
	n	n	n	n		To follow up on research conducted in several countries, in this paper, we look at the dilemmas middle-class parents face of being "good parents"by choosing the "best"school with a milieu-related environment for their child versus being "good citizens"by choosing a "local"public school with a large proportion of students from a working-class or migrant background. Analyzing semi-structured interv…	Mayer T., Geist V., Pohl V.S., Schwarz J., Koinzer T.	A parental school choice misery: Middle class parents' dilemma in choosing a primary school in Berlin's multi-ethnic neighborhoods	2020	Journal of Pedagogy	10.2478/jped-2020-0003	neighborhood; private school; school choice; segregation; spatial inequalities	Scopus
	y	y	y	n		Children's outdoor experiences have been explored for many years but little research has specifically highlighted the role of water in children's outdoor play. In this paper we present findings from an innovative study which focussed on children's play with water in three urban green spaces: two neighbourhood parks and one civic space. We define constructed and natural water features and explore …	Bozkurt M., Woolley H.	Let's splash: Children's active and passive water play in constructed and natural water features in urban green spaces in Sheffield	2020	Urban Forestry and Urban Greening	10.1016/j.ufug.2020.126696	Children; children's experiences; public water features; urban green space; water play	Scopus
	y	n	n	n		Behavior mapping is an effective tool for the direct observation of the interaction between people and places. However, current approaches have shortcomings that introduce location inaccuracies and hinder micro-context recording of observed activities. This study explores the applicability of unmanned aerial vehicles (UAVs) in behavior mapping. First, we suggest a protocol for the use of UAVs in …	Park K., Christensen K., Lee D.	Unmanned aerial vehicles (UAVs) in behavior mapping: A case study of neighborhood parks	2020	Urban Forestry and Urban Greening	10.1016/j.ufug.2020.126693	Behavior setting; Behavioral mapping; Evidence-based design; Public space; UAS; Unmanned aircraft system; Urban parks	Scopus
	y	n	y	y		Purpose: The type of dwelling where a child lives is an important factor when considering residential exposure to environmental agents. In this paper, we explore its role when estimating the potential effects of magnetic fields (MF) on leukemia using data from the California Power Line Study (CAPS). In this context, dwelling type could be a risk factor, a proxy for other risk factors, a cause of …	Amoon A.T., Crespi C.M., Nguyen A., Zhao X., Vergara X., Arah O.A., Kheifets L.	The role of dwelling type when estimating the effect of magnetic fields on childhood leukemia in the California Power Line Study (CAPS)	2020	Cancer Causes and Control	10.1007/s10552-020-01299-9	Childhood leukemia; Electromagnetic fields; Power lines; Proximity; Residence	Scopus
	n	n	n	n		Background: Despite evidence that ambient air pollution may play a role in the development of asthma, little is known about the potential contribution of industrial emissions. Objective: We used a population-based birth cohort to investigate the association between asthma onset in childhood and residential exposure to industrial emissions, estimated from atmospheric dispersion modeling. Methods: …	Buteau S., Shekarrizfard M., Hatzopolou M., Gamache P., Liu L., Smargiassi A.	Air pollution from industries and asthma onset in childhood: A population-based birth cohort study using dispersion modeling	2020	Environmental Research	10.1016/j.envres.2020.109180		Scopus
	y	n	n	n		Green space has been associated with better health and well-being. However, most studies have been cross-sectional with limited long-term exposure data. Further, research is limited in what type of green space is beneficial for health. We conducted a longitudinal study to assess sensitive periods (birth, childhood or adulthood) of exposure to different types of green space in association with adu…	Jimenez M.P., Wellenius G.A., James P., Subramanian S.V., Buka S., Eaton C., Gilman S.E., Loucks E.B.	Associations of types of green space across the life-course with blood pressure and body mass index	2020	Environmental Research	10.1016/j.envres.2020.109411	Green space; Hypertension; Longitudinal data0; Multilevel models; Obesity; Sensitive periods	Scopus
	y	n	n	y		Urban green spaces (UGS) offer a wide range of ecosystem services to city dwellers, contributing to their health and well-being. The resources of formally designated UGS, such as parks and forests, are frequently underprovided, however. This results in unequal access to UGS, which has become an environmental justice issue. We investigated the potential of informal green spaces (IGS) to complement…	Sikorska D., Łaszkiewicz E., Krauze K., Sikorski P.	The role of informal green spaces in reducing inequalities in urban green space availability to children and seniors	2020	Environmental Science and Policy	10.1016/j.envsci.2020.03.007	Environmental justice; Recreation; Spatial analysis; Spontaneous vegetation; Unmanaged greenery; Urban ecosystem services; Urban planning	Scopus
	n	n	n	n		Lead (Pb) exposure is known to affect the health of children while soil Pb is an important contributor to human Pb exposure. To analyze the effects of both environmental and other factors, especially total and bioaccessible Pb in neighborhood soil, on school-aged urban children's blood lead level (BLL), 75 children (6–11 years old) were recruited from an industry city in eastern China for BLL mea…	Wu Y., Lou J., Sun X., Ma L.Q., Wang J., Li M., Sun H., Li H., Huang L.	Linking elevated blood lead level in urban school-aged children with bioaccessible lead in neighborhood soil	2020	Environmental Pollution	10.1016/j.envpol.2020.114093	Blood lead level; Health risk assessment; Pb bioaccessibility; School-aged children; Urban soil	Scopus
	y	n	y	n		There has been an extensive tradition of geographical studies7 conducted to analyse the access to urban parks or green spaces. Several studies deploy approaches to measure the potential spatial accessibility and congestion of children’s playgrounds in urban areas. Identifying inequalities in terms of spatial access to children’s playgrounds is an important issue that could be useful for urban pla…	Martori J.C., Apparicio P., Séguin A.-M.	Spatial Potential Accessibility of Playgrounds in Barcelona City	2020	Applied Spatial Analysis and Policy	10.1007/s12061-019-09316-4	Accessibility and congestion measures; Barcelona city; Multinomial logistic regression; Playgrounds; Spatial models	Scopus
	y	y	y	n		Purpose: The playground is a commonly advised means to integrate children into the public realm of “child-friendly cities”, yet research has tended not to examine it in relation to adjacent public space. This paper aims to understand the extent to which the playground – a socio-spatial phenomenon – facilitates children's integration into the public realm, enabling critical examination of the “chi…	Pitsikali A., Parnell R., McIntyre L.	The public value of child-friendly space: Reconceptualising the playground	2020	Archnet-IJAR	10.1108/ARCH-07-2019-0164	Athens; Child-friendly city; Ethnography; Playground; Public realm; Public value	Scopus
	n	n	y	n		Background: Paediatric, pedestrian road traffic injuries (PPRTIs) constitute a major cause of premature death in Iran. Identification of high-risk areas would be the primary step in designing policy intervention for PPRTI reduction because environmental factors play a significant role in these events. The present study aims to determine high-risk areas for PPRTIs at three different geographical s…	Shabanikiya H., Hashtarkhani S., Bergquist R., Bagheri N., Vafaeinejad R., Amiri-Gholanlou M., Akbari T., Kiani B.	Multiple-scale spatial analysis of paediatric, pedestrian road traffic injuries in a major city in North-Eastern Iran 2015-2019	2020	BMC Public Health	10.1186/s12889-020-08911-2	Cluster analysis; Geographical information system; Iran; Paediatric; Pedestrian accident; Road traffic injuries; Spatial analysis	Scopus
	n	n	y	n		Objectives This study investigated physical activity (PA) and sedentary behaviour (SB) among preschool-aged children in Singapore and potential correlates at multiple levels of the socioecological model from in-school and out-of-school settings. Design A cross-sectional study using a mixed-methods approach. Participants Parent-child dyads from six preschools in Singapore. Methods PA and SB of chi…	Chen B., Waters C.N., Compier T., Uijtdewilligen L., Petrunoff N.A., Lim Y.W., Van Dam R., Müller-Riemenschneider F.	Understanding physical activity and sedentary behaviour among preschool-aged children in Singapore: A mixed-methods approach	2020	BMJ Open	10.1136/bmjopen-2019-030606	correlates; early childhood; in-school setting; out-of-school setting; socio-ecological model	Scopus
	y	n	y	y		The purpose of this study was to analyze the frequency and contents of horticultural activities in 696 individual activities listed in 11 teacher’s guidebooks of Nuri Curriculum for 5-year-olds, and to find out the perceptions of horticultural activities in the formal curriculum. The target horticultural activities that were selected were those using natural objects like potted plants, water, win…	Choi B.J., Jeong Y.J., Kim M.J., Yun S.Y.	Analysis of horticultural activities in the teacher’s guidebooks of nuri curriculum for 5-year-olds	2020	Journal of People, Plants, and Environment	10.11628/ksppe.2020.23.2.211	Activity domains; Activity types; Children’s horticulture; Horticultural program; Life-based themes	Scopus
	y	n	y	y		Background Identification of features of the neighbourhood physical environment that have a causal association with positive child development is important for promoting long-term developmental health. Previous research on these associations have been conducted at the neighbourhood level, and do not account for individual variation in exposure to these features. Methods This cross-sectional study…	Bell M.F., Turrell G., Beesley B., Boruff B., Trapp G., Zubrick S.R., Christian H.E.	Children's neighbourhood physical environment and early development: An individual child level linked data study	2020	Journal of Epidemiology and Community Health	10.1136/jech-2019-212686	GIS; lifecourse/childhood circumstances; neighborhood/place; public health; record linkage	Scopus
	n	n	n	n		Background: One of the main objectives of health policy-makers is to promote children's growth, development, and survival. The current research evaluates the impact of breastfeeding on infant survival and highlights the major socio-economic determinants of child survival from 0 to 5 years old in Côte d'Ivoire. Methods: This study uses Probit estimation to evaluate the impact of the type of breast…	Yapo Y.V.	Breastfeeding and child survival from 0 to 5 years in Côte d'Ivoire	2020	Journal of Health, Population and Nutrition	10.1186/s41043-020-0210-4	Child survival; Côte d'Ivoire; Exclusive Breastfeeding; Health; Mother; up to 6 months	Scopus
	y	n	y	y		Although many previous studies have identified inequalities among children based on various neighborhood characteristics, it is still difficult to determine what is most needed for individual neighborhoods to support child development at an early age, and for providing public interventions and appropriate resources to meet the diverse and urgent needs of young children. This study proposes a tool…	Yoo D.-U., Lee S.	Neighborhood sustainability measure for preschool children based on proximity to major service amenities	2020	Sustainability (Switzerland)	10.3390/su12051712	Accessibility; Amenity; Deprivation; Healthcare; Index; Neighborhood; Parks; Preschool children; Resources; Service	Scopus
	n	n	n	n		Introduction: In recent years, there has been growing interest in studies integrating social cognitive and environmental variables as predictors of active transport to school (ATS). However, a theoretical model of associations between children's ATS and these variables has not been well established. The aims of this study were (1) to develop and test a model which conceptualized relationships bet…	Zaragoza J., Corral A., Ikeda E., García-Bengoechea E., Aibar A.	Assessment of psychological, social cognitive and perceived environmental influences on children's active transport to school	2020	Journal of Transport and Health	10.1016/j.jth.2020.100839	Active commuting to school travel; Perceived environment; Social cognitive; Structural equation modelling	Scopus
	y	y	y	y		A convergent parallel mixed methods design was used to understand parenting practices for outdoor play, their influence on adolescent's physical activity and outdoor play and the role of the neighborhood and child's sex. Adolescents (n = 263) and their parents completed questionnaires and wore accelerometers. Parents (n = 30) participated in in-depth interviews. Parenting practices were examined …	Kepper M.M., Staiano A.E., Katzmarzyk P.T., Reis R.S., Eyler A.A., Griffith D.M., Kendall M.L., ElBanna B., Denstel K.D., Broyles S.T.	Using mixed methods to understand women's parenting practices related to their child's outdoor play and physical activity among families living in diverse neighborhood environments	2020	Health and Place	10.1016/j.healthplace.2020.102292	Independent mobility; Mixed methods; Neighborhood disadvantage; Outdoor play; Parenting practices; Physical activity	Scopus
	n	n	y	y		This research offers insights into children's agency in the context of recycling behaviors by exploring how children's agency might be enacted in various settings (e.g., family, school, neighborhood). Using a series of child-centered methods, the authors observe children's recycling behaviors at school and at home and investigate their behaviors using role-playing games and a verbalization phase …	Schill M., Godefroit-Winkel D., Hogg M.K.	Young children's consumer agency: The case of French children and recycling	2020	Journal of Business Research	10.1016/j.jbusres.2020.01.030	Agency; Children; Family; Microenvironment; Recycling behaviors; Social cognitive theory	Scopus
	y	n	y	n		Introduction: Active school travel (AST) is important for child and environmental health. In New Zealand, AST has declined over recent decades and is relatively low compared to many other countries. A plethora of evidence related to children's AST exists, yet a holistic and context-specific understanding of factors related to the behaviour remains elusive. The aim of this study is to triangulate …	Smith M., Ikeda E., Hawley G., Mavoa S., Hosking J., Egli V., Zhao J., Mackay L., Donnellan N., Amann R., Mackie H., Witten K.	An integrated conceptual model of environmental needs for New Zealand children's active travel to school: Environmental needs for active school travel	2020	Journal of Transport and Health	10.1016/j.jth.2019.100814	Active transport; Geographic information systems; Mixed methods; Neighbourhood environment; Transport safety	Scopus
	y	n	n	n		Historical centers of small towns are a unique example of public space. They are often the most representative feature of a town, as well as a tourist attraction, but they are also residential districts. The unique character of historical downtown areas has prompted the authors to evaluate the nature of interactions between members of the local community and public spaces using the example of a r…	Szczepańska A., Pietrzyk K.	Evaluation of Public Spaces in Historical Centers of Small Towns: Case Study	2020	Journal of Urban Planning and Development	10.1061/(ASCE)UP.1943-5444.0000542		Scopus
	n	n	n	n		Background: About one in ten mothers experience postpartum depression (PPD) in Japan. Although the individual and social risk factors of depression have been reported, few studies have focused on the neighborhood environmental features. In this study, we examined the association between neighborhood environmental features and PPD symptoms among Japanese women. Methods: Questionnaire survey includ…	Miura R., Tani Y., Fujiwara T., Kawachi I., Hanazato M., Kim Y.	Multilevel analysis of the impact of neighborhood environment on postpartum depressive symptoms	2020	Journal of Affective Disorders	10.1016/j.jad.2019.11.033	Japan; Neighborhood environment; Physical environment; Postpartum depression; Social capital	Scopus
	y	n	y	n		We conducted secondary data analyses of pooled data from a clinical trial that prescribed park visits to children and their caregivers in a low-income, urban setting. Data were collected at the prescribing visit (baseline) and at one and three months of follow up from 78 families. Family characteristics were identified at baseline; regression models were used to explore changes during follow up i…	Razani N., Hills N.K., Thompson D., Rutherford G.W.	The association of knowledge, attitudes and access with park use before and after a park-prescription intervention for low-income families in the U.S.	2020	International Journal of Environmental Research and Public Health	10.3390/ijerph17030701	Behavioral theory; Health; Park prescriptions; Park use; Pediatrics	Scopus
	y	n	y	n		Urban parks provide spaces and facilities for children's physical activity (PA) and can be a free resource in low-income communities. This study examined whether neighborhood characteristics were associated with children's park use and park-based moderate-to-vigorous PA (MVPA) in low-income diverse communities and how associations differed between ethnic groups. Data on park visits and MVPA came …	Huang J.-H., Hipp J.A., Marquet O., Alberico C., Fry D., Mazak E., Lovasi G.S., Robinson W.R., Floyd M.F.	Neighborhood characteristics associated with park use and park-based physical activity among children in low-income diverse neighborhoods in New York City	2020	Preventive Medicine	10.1016/j.ypmed.2019.105948	Built environment; Exercise; Health disparities; Recreation; Social equity; Urban green space	Scopus
	y	y	y	n		All people need to engage in routine physical activity and children require it daily. Playgrounds are settings designed for children to be physically active, yet there has been little research assessing which play elements and structures are associated with more moderate-to-vigorous physical activity (MVPA) among both youth and adults. We conducted a national study of neighborhood parks with the …	Cohen D.A., Han B., Williamson S., Nagel C., McKenzie T.L., Evenson K.R., Harnik P.	Playground features and physical activity in U.S. neighborhood parks	2020	Preventive Medicine	10.1016/j.ypmed.2019.105945	Age groups; Design; Gender; Parks; Physical activity; Playgrounds	Scopus
	y	n	y	n		Objectives: To describe cycling behaviours and examine individual, social and neighbourhood correlates of cycling among children living in socio-economically disadvantaged neighbourhoods. Design: Cross-sectional. Methods: Mothers of 289 children (46% boys) aged 8–15 (mean 12 ± 2.2) years living in disadvantaged neighbourhoods in Victoria, Australia were surveyed about their child's cycling freque…	Bell L., Timperio A., Veitch J., Carver A.	Individual, social and neighbourhood correlates of cycling among children living in disadvantaged neighbourhoods	2020	Journal of Science and Medicine in Sport	10.1016/j.jsams.2019.08.010	Bicycling; Child health; Cross-sectional; Exercise; Mothers; Vulnerable populations	Scopus
	n	n	y	n		Socio economic inequities in obesity have been attributed to individuals’ psychosocial and behavioral characteristics. School environment, where children spend a large part of their day, may play an important role in shaping their health. This study aims to assess whether prevalence of overweight and obesity among elementary school students was associated with the school’s social and built enviro…	Amram O., Amiri S., Lutz R.B., Crowley A., Monsivais P.	The Association Between Obesity, Socio-Economic Status, and Neighborhood Environment: A Multi-Level Analysis of Spokane Public Schools	2020	Journal of Community Health	10.1007/s10900-019-00714-w	Health equity; Obesity; School environment; Socioeconomic status	Scopus
	n	n	y	n		Attention-deficit/hyperactivity disorder (ADHD) is a highly heritable neurodevelopmental disorder. However, no study has examined genetic and environmental influences in the longitudinal developmental course of ADHD symptoms in a non-Western population. This study investigated changes of genetic and environmental influences and their contributions to the stability and change of ADHD symptoms of h…	Zheng Y., Pingault J.-B., Unger J.B., Rijsdijk F.	Genetic and environmental influences on attention-deficit/hyperactivity disorder symptoms in Chinese adolescents: a longitudinal twin study	2020	European Child and Adolescent Psychiatry	10.1007/s00787-019-01346-0	ADHD; Adolescent; Chinese; Genetic influences; Twins	Scopus
	y	y	y	n		Although play activity is essential for children, opportunities for play is decreasing due to changes in life patterns. Urban neighbourhoods should be part of the provision of space where children can play freely and should help children play as part of their daily routine. This study analysed the elementary school neighbourhood environment features influencing the play activity of children. Stud…	Lee W.M., Park H.S., Kim S.N., Kim J.C., Lee K.H.	Effects of elementary school neighbourhood environment on children’s play activities: a case study of GaeMyong elementary school neighbourhood	2020	International Journal of Urban Sciences	10.1080/12265934.2019.1570862	adventurous play; children’s play activities; community consciousness; crime safety; Elementary school neighbourhood environment; traffic safety; walking environment	Scopus
	n	n	y	n		Leprosy, a disease caused by M. leprae, mainly affects dermis and peripheral nerve but is feared for its complications, and disabilities. Despite major reduction in leprosy cases after use of multi-drug therapy, blocking the transmission of leprosy is an arduous task due to factors that are possibly involved, these include agent (microbial characteristics), host and environmental factors. These f…	Prakoeswa F.R.S., Soebono H., Husada D., Notobroto H.B., Listiawan M.Y., Endaryanto A., Prakoeswa C.R.S.	Towards prevention and eradication of leprosy: Current status and research needed in community health & immune dysregulation	2020	Indian Journal of Leprosy		Immune Dysregulation in Leprosy; Leprosy; Risk Factors of Leprosy	Scopus
	n	n	n	y		The three-square sequence (Croatian Great Men Square - Square of the Victims of Fascism - Krešimir Square) is the backbone of the eastern part of Zagreb' s city centre. The urban status of this extension of the Lower Town is a result of the evolution of the district that used to be called “the area east of Draškovićeva Street” in the regulation plans, which at the turn of the 20th century meant b…	Mahečić D.R.	The three-square sequence (Croatian Great Men Square - Square of the Victims of Fascism - Krešimir Square) and the urban status of the eastern extension of Zagreb's lower town [Potez triju trgova (Trg hrvatskih velikana - Trg žrtava fašizma - Krešimirov trg) - Urbani status istočne ekstenzije zagrebačkoga Donjeg grada]	2020	Radovi Instituta za Povijest Umjetnosti	10.31664/RIPU.2020.44/2.10	Classical modernism of the 1920s; Interpolation; Interwar architecture; Milan Lenuci; Regulatory Plan for the Eastern Part of the City (1905); Regulatory plans; Urban planning; Zagreb architecture	Scopus
	n	n	n	n		Human-wildlife interactions are believed to be increasing worldwide, and a number of studies have analyzed the risks posed by larger carnivores. However, people can also perceive smaller species of carnivores as threatening, particularly in urban areas. Red foxes (Vulpes vulpes) started to colonize British cities in the 1930s, and there is growing public concern about foxes biting people, particu…	Bridge B., Harris S.	Do urban red foxes attack people? An exploratory study and review of incidents in Britain	2020	Human-Wildlife Interactions		Canid attacks; Dominance; Human-wildlife interactions; Infant vocalizations; Investigative behavior; Playback experiments; Red fox; United kingdom; Urban carnivores; Vulpes vulpes	Scopus
可以引用在大论文中，因为家庭结构和家中媒体接触可能是影响学龄前儿童PA模式的重要因素。构建的环境相关因素可以通过父母帮助幼儿积极参与行为间接影响幼儿户外活动	n	n	y	n		Objective: This cross-sectional study examined environmental correlates of sedentary behavior (SB) and physical activity (PA) in preschool children in the urban area of Tianjin, China. Methods: Data were collected from the Physical Activity and Health in Tianjin Chinese Children study, involving healthy children 3–6 years old and their families. In all children (n = 980), leisure-time SB (LTSB) a…	Lu C., Shen T., Huang G., Corpeleijn E.	Environmental correlates of sedentary behaviors and physical activity in Chinese preschool children: a cross-sectional study	2020	Journal of Sport and Health Science	10.1016/j.jshs.2020.02.010	Active commuting; Built environment; Family structure; Media exposure; Traffic safety	Scopus
	n	n	y	n		First Nations peoples in Canada have a history of poor mental health outcomes, as the result of colonisation and the legacy of residential schools. The PAX Good Behaviour Game (PAX-GBG) is a school-based intervention shown to improve student behaviour, academic outcomes, and reduce suicidal thoughts and actions. This study examines the use of PAX-GBG in First Nations Grade 1 classrooms in Manitob…	Jack E.M., Chartier M.J., Ly G., Fortier J., Murdock N., Cochrane B., Weenusk J., Woodgate R.L., Munro G., Sareen J.	School personnel and community members’ perspectives in implementing PAX good behaviour game in first nations grade 1 classrooms	2020	International Journal of Circumpolar Health	10.1080/22423982.2020.1735052	case study; implementation; indigenous; Mental health; promotion; qualitative; school	Scopus
	y	n	n	y		The aim of this study was to evaluate environmental contamination by helminth eggs with zoonotic potential that were found in dog feces in the vicinity of elementary schools. Seventy-nine samples of dog feces were collected from 28 municipal schools located in five neighborhoods in Pelotas, Rio Grande do Sul (RS), Brazil. The samples were processed using the Willis-Mollay technique and analyzed u…	de Mello C.C.S., Nizoli L.Q., Ferraz A., Chagas B.C., Azario W.J.D., Villela M.M.	Helminth eggs with zoonotic potential in the vicinity of public schools in southern brazil [Ovos de helmintos com potencial zoonótico nas proximidades de escolas públicas no extremo sul do brasil]	2020	Revista Brasileira de Parasitologia Veterinaria	10.1590/s1984-29612019102	Environmental contamination; Hookworms; Larva migrans; Toxocara spp	Scopus
	n	n	n	n		Maternal alcohol consumption during pregnancy is responsible for negative health outcomes. The literature shows that socio-economic and lifestyle factors are both related with alcohol consumption during pregnancy; nevertheless, the role of other factors is unclear. The objective of this study is to assess the role that partners' alcohol consumption plays, that played by accessibility to alcohol, …	Ortega-García J.A., López-Hernández F.A., Azurmendi Funes M.L., Sánchez Sauco M.F., Ramis R.	My partner and my neighbourhood: The built environment and social networks’ impact on alcohol consumption during early pregnancy	2020	Health and Place	10.1016/j.healthplace.2019.102239		Scopus
	n	n	n	n		Planned relocation may permanently reduce exposure to natural hazards; however, residents in designated relocation zones are confronted with a broad array of challenges and face profound changes in their everyday lives. The present study empirically illustrates how economic, emotional, risk and social dimensions underpin household decisions to accept or decline a home buyout offer in a voluntary …	Seebauer S., Winkler C.	Should I stay or should I go? Factors in household decisions for or against relocation from a flood risk area	2020	Global Environmental Change	10.1016/j.gloenvcha.2019.102018	Climate change; Flooding; Place identity; Planned relocation; Resettlement	Scopus
	n	n	y	n		Purpose of the study: This research-action focuses on the prevention of interpersonal violence in primary schools through a work on emotions and situations of otherness with children and educational teams. In a context of school climate marked by violence, the study particularly questions the possible evolution of empathy, alexithymia and self-esteem in children following a research-action device…	Karray A., Vasile J., Bagnulo A., Grillo M.	Interpersonal violence and empathy. Prevention through research-action in school [Violence interpersonnelle et empathie. Prévention par une recherche-action en milieu scolaire]	2020	Neuropsychiatrie de l'Enfance et de l'Adolescence	10.1016/j.neurenf.2019.10.003	Alterity; Empathy; Research-action; School violence	Scopus
	y	n	y	n		In the United States, obesity rates among children remain a pressing public health concern Compounding that, disparities exist with higher childhood obesity among minority and lower socioeconomic neighborhoods. Physical activity is associated with more favorable weight status in children and adolescents. Purpose: This study aimed to identify and explore factors that influence physical activity in…	Duck A.A., Robinson J.C., Stewart M.W.	Adults' and children's perceptions of barriers and facilitators of school-aged children's physical activity in an inner-city urban area	2020	Journal for Specialists in Pediatric Nursing	10.1111/jspn.12278	barriers; children; facilitators; focus group; Photovoice; physical activity	Scopus
将聚集的地方改为互动或学习的公共空间,小论文可以引用	y	n	n	n		How can we transform places where people gather or wait into hubs for interaction and playful learning? Bus stops offer one setting in which to test this idea. Urban Thinkscape reimagines an everyday bus stop in an under-resourced area as an interaction zone instead of merely a place to wait for a ride. Results suggest that embedding playful learning into architectural design is associated with i…	Hassinger-Das B., Palti I., Golinkoff R.M., Hirsh-Pasek K.	Urban Thinkscape: Infusing Public Spaces with STEM Conversation and Interaction Opportunities	2020	Journal of Cognition and Development	10.1080/15248372.2019.1673753		Scopus
	y	n	n	n		Objectives: Road intersection density is an important indicator of walkability. The objectives of this study were to examine the trends in intersection density in the US from 2007 to 2011 and assess the associations between intersection density and childhood obesity risk at the state level. Study design: Longitudinal analyses were conducted to assess the spatial-temporal changes of population-wei…	Xue H., Cheng X., Jia P., Wang Y.	Road network intersection density and childhood obesity risk in the US: a national longitudinal study	2020	Public Health	10.1016/j.puhe.2019.08.002	Childhood obesity; Geographic information system; Neighborhood environment; Spatial analysis; Walkability	Scopus
	n	n	y	n		This paper examines recent urban green amenities directed toward children and families and develops a novel understanding of the ways in which children's socio-natures are made/unmade through such interventions. We employ ethnographic and archival analysis in two new parks – Poble Nou and Nou Barris – in Barcelona to examine how a particular type of children's wellbeing, what we call “relational …	Pérez del Pulgar C., Anguelovski I., Connolly J.	Toward a green and playful city: Understanding the social and political production of children's relational wellbeing in Barcelona	2020	Cities	10.1016/j.cities.2019.102438	Barcelona; Children-nature-play; Environmental justice; Gentrification; Relational wellbeing; Urban environmental equity; Urban political ecology	Scopus
	n	n	y	n		Objective • To investigate the seroprevalence of Toxocara canis (T. canis) from preschool children in Yangpu District of Shanghai, and to evaluate the environmental contamination with T. canis eggs in public areas. Methods • A cross-sectional study was performed. A total of 789 children from 7 kindergartens in Yangpu District of Shanghai were asked to fill up a questionnaire. Serum samples of 605…	Lu Z.-P., Zhang X., Li J., Mi R.-S., Zhao P.-Q.	Seroprevalence of Toxocara canis infection in preschool children and environmental contamination with Toxocara canis eggs in Yangpu District of Shanghai [上海市杨浦区学龄前儿童犬弓首蛔虫的感染情况及环境中犬弓首蛔虫的存在情况调查]	2019	Journal of Shanghai Jiaotong University (Medical Science)	10.3969/j.issn.1674-8115.2019.12.018	Environment; Ocular toxocariasis; Preschool children; Seroepidemiology; Toxocara canis	Scopus
	y	y	y	n		Objectives Preschool is an important setting for regulating sedentary time (ST). The preschool day in Finland follows daily structures by having morning and afternoon slots for group-based activities that can encourage children for movement (eg, free play and outdoor time) or be still (eg, teacher-led sessions and sitting-based circles). This study aims to explore if the weekly routines in presch…	Määttä S., Lehto R., Konttinen H., Ray C., Sajaniemi N., Erkkola M., Roos E.	Preschool group practices and preschool children's sedentary time: A cross-sectional study in Finland	2019	BMJ Open	10.1136/bmjopen-2019-032210	children; physical activity; public health; sedentary lifestyle	Scopus
	y	y	y	y		Background: Physical activity (PA) is one of the major protective behaviours to prevent non-communicable diseases. Positive effects of the built environment on PA are well investigated, although evidence of this association is mostly based on cross-sectional studies. The present study aims to investigate the longitudinal effects of built environment characteristics in terms of a moveability index…	Buck C., Eiben G., Lauria F., Konstabel K., Page A., Ahrens W., Pigeot I.	Urban Moveability and physical activity in children: Longitudinal results from the IDEFICS and I.Family cohort	2019	International Journal of Behavioral Nutrition and Physical Activity	10.1186/s12966-019-0886-2	Accelerometer; Built environment; Childhood obesity; European children's cohort; Physical activity; Walkability	Scopus
	n	n	n	n		Objective: Fused filament fabrication “3-dimensional (3-D)” printing has expanded beyond the workplace to 3-D printers and pens for use by children as toys to create objects. Materials and methods: Emissions from two brands of toy 3-D pens and one brand of toy 3-D printer were characterized in a 0.6 m3 chamber (particle number, size, elemental composition; concentrations of individual and total v…	Yi J., Duling M.G., Bowers L.N., Knepp A.K., LeBouf R.F., Nurkiewicz T.R., Ranpara A., Luxton T., Martin S.B., Jr., Burns D.A., Peloquin D.M., Baumann E.J., Virji M.A., Stefaniak A.B.	Particle and organic vapor emissions from children’s 3-D pen and 3-D printer toys	2019	Inhalation Toxicology	10.1080/08958378.2019.1705441	3-D printing; children; exposure; particles; toys; volatile organic compounds	Scopus
	n	n	n	n		This paper provides evidence from the literature regarding the social benefits associated with plants and how they influence the physiological, psychological, and cognitive well-being constructs affecting quality of life. These benefits are segmented and discussed using the following categories: place or community attachment, reduced crime, disaster resilience, access to locally-produced foods, s…	Hall C.R., Knuth M.J.	An update of the literature supporting the well-being benefits of plants: Part 3 - social benefits	2019	Journal of Environmental Horticulture	10.24266/0738-2898-37.4.136	Benefits of plants; Community; Social benefits	Scopus
	n	n	n	n		Evolved mechanisms of phenotypic plasticity, which are evolutionary processes in their own right, enable species to respond adaptively to their environments. The Scandinavian countries, and Norway in particular, have for many years scored exceptionally high on lists of life quality, economic indicators, and measures of happiness. We propose that learning prosocial and cooperative behavior, which …	Simon C., Mobekk H.	Dugnad: A Fact and a Narrative of Norwegian Prosocial Behavior	2019	Perspectives on Behavior Science	10.1007/s40614-019-00227-w	Dugnad; Evolution; Nordic model; Nurturing environment; Patterns of behavior; Prosociality	Scopus
	y	n	n	n		Street trees are an important component of green infrastructure in cities, providing multiple ecosystem services (ES) and hence contributing to urban resilience, sustainability and livability. Still, access to these benefits may display an uneven distribution across the urban fabric, potentially leading to socio-environmental inequalities. Some studies have analyzed the distributional justice imp…	Baró F., Calderón-Argelich A., Langemeyer J., Connolly J.J.T.	Under one canopy? Assessing the distributional environmental justice implications of street tree benefits in Barcelona	2019	Environmental Science and Policy	10.1016/j.envsci.2019.08.016	Green infrastructure; Socio-environmental equity; Spatial analysis; Urban climate adaptation; Urban ecosystem services	Scopus
	n	y	y	n		Knowledge on how to improve public open spaces in deprived neighbourhoods to increase active living among children is scarce and comprehensively evaluated public open space interventions are needed. Firstly, the aim was to explore if involving 39 local fifth-grade children (10–11 years old) from a deprived neighbourhood in creating playable installations in a public open space influenced their us…	Pawlowski C.S., Schmidt T., Nielsen J.V., Troelsen J., Schipperijn J.	Will the children use it?—A RE-AIM evaluation of a local public open space intervention involving children from a deprived neighbourhood	2019	Evaluation and Program Planning	10.1016/j.evalprogplan.2019.101706	Active living; Children; Deprived neighbourhood; Implementation; Maintenance; Participatory design; Public open space; RE-AIM	Scopus
	y	y	y	n		This paper investigates children’s experiences of hyperdiversity in public spaces in inner city and suburban neighbourhoods in Auckland, New Zealand. As children walk through, and talk about, their everyday places of play and mobility they sense and reveal material and relational diversity in the places and people they encounter. We examine temporal and affective changes in children’s experiences…	Witten K., Kearns R., Carroll P., Asiasiga L.	Children’s everyday encounters and affective relations with place: experiences of hyperdiversity in Auckland neighbourhoods [Rencontres quotidiennes et relations affectives d'enfants avec l'espace: expériences d'hyper diversité dans les quartiers d'Auckland] [Los encuentros cotidianos de los niños y las relaciones afectivas con el lugar: experiencias de hiper-diversidad en los barrios de Auckland]	2019	Social and Cultural Geography	10.1080/14649365.2017.1347700	afecto; affect; affect; Children’s geographies; children’s independent mobility; geografías de los niños; géographies des enfants; hiper-diversidad; hyper diversité; hyperdiversity; lieu; lugar; mobilité indépendante des enfants; movilidad independiente de los niños; New Zealand; Nouvelle Zélande; Nueva Zelanda; place	Scopus
	n	n	n	n		Numerous epidemiological studies have confirmed the negative influences of air pollutants on human health, where fine particles (PM2.5) and nitrogen dioxide (NO2) cause the highest health risks. However, the traditional studies have only involved the ambient concentration for a short to medium time period, which ignores the influence of indoor sources, the individual time-activity pattern, and th…	Li N., Maesano C.N., Friedrich R., Medda E., Brandstetter S., Kabesch M., Apfelbacher C., Melter M., Seelbach-Göbel B., Annesi-Maesano I., Sarigiannis D., the KUNO-Kids study group	A model for estimating the lifelong exposure to PM2.5 and NO2 and the application to population studies	2019	Environmental Research	10.1016/j.envres.2019.108629	Exposure modelling; Fine particles; Nitrogen dioxide; Sequence analysis; Socio-demographic characteristics	Scopus
	y	y	y	y		BACKGROUND: A rapidly growing body of research suggests that qualities of the built environment can promote active living among children and youth. Nevertheless, shortcomings in the current evidence for understanding which built environment characteristics provide opportunities for taking part in activities in childhood remain. This study aimed to examine whether population density, green spaces,…	Nordbø E.C.A., Raanaas R.K., Nordh H., Aamodt G.	Neighborhood green spaces, facilities and population density as predictors of activity participation among 8-year-olds: a cross-sectional GIS study based on the Norwegian mother and child cohort study	2019	BMC public health	10.1186/s12889-019-7795-9	Built environment; Children; Geographic information systems; Organized activity; Physical activity; Social activity; The Norwegian mother and child cohort study; Well-being	Scopus
	y	y	y	y		Understanding factors that influence parenting decisions for outdoor play is necessary to promote physical activity during critical years for adolescent adjustment. This study explored physical and social environmental influences on parenting decisions and rules for their child’s outdoor play using semistructured in-depth interviews with parents (n = 30, 29 of whom were mothers) of adolescents. M…	Kepper M.M., Staiano A.E., Katzmarzyk P.T., Reis R.S., Eyler A.A., Griffith D.M., Kendall M.L., Elbanna B., Denstel K.D., Broyles S.T.	Neighborhood influences on women’s parenting practices for adolescents’ outdoor play: A qualitative study	2019	International Journal of Environmental Research and Public Health	10.3390/ijerph16203853	Adolescent; Adolescent wellbeing; Neighborhood; Outdoor play; Parenting; Physical activity	Scopus
	y	y	y	y		Residential Treatment Centers (RTCs) serve youth who have suffered extreme abuse and trauma and must reside in 24-hour facilities to receive mental health, medication, and social services. Currently, specific therapeutic interventions utilize talk therapy or cognitive therapies, which may have limited use with children due to developmental considerations, specifically children who have been throu…	Agarwal S.M., Ray D.C.	Play Therapy in Residential Treatment Centers for Children	2019	Residential Treatment for Children and Youth	10.1080/0886571X.2018.1536496	child-centered play therapy; play therapy; Residential treatment	Scopus
	n	n	y	y		Objective. Home food environments are important contexts for children and their food intake. It is unknown whether neighborhood economic context plays a role in explaining the association between a national economic crisis and children’s home food environments. This study attempts to investigate neighborhood economic changes after the Great Recession and their associations with home food environm…	Kim Y., Cubbin C.	Neighborhood Economic Changes After the Great Recession and Home Food Environments	2019	Health Education and Behavior	10.1177/1090198119859409	child health environments; home food environments; neighborhood; The Great Recession	Scopus
	y	n	n	n		Objective: To evaluate trends and geographic distribution of infant bronchiolitis hospitalizations in Chile, a country with large variation in solar radiation (SR) and high rates of urban air pollution. Methods: We performed a nationwide ecological study of bronchiolitis hospitalizations from 2001 to 2014. We investigated the associations of regional SR (a proxy of vitamin D status) and regional …	Terrazas C., Castro-Rodriguez J.A., Camargo C.A., Jr., Borzutzky A.	Solar radiation, air pollution, and bronchiolitis hospitalizations in Chile: An ecological study	2019	Pediatric Pulmonology	10.1002/ppul.24421	air pollution; bronchiolitis; children; vitamin D; vitamin D deficiency	Scopus
	y	y	y	n		Objectives: The aim of the study is to assess the use and levels of moderate-to-vigorous physical activity (MVPA) occurring in innovative playgrounds in London vs. traditional playgrounds in the US in neighborhoods with a similar population density. Study design: This is a cross-sectional observational study. Methods: We selected a sample of London playgrounds based on their innovative design. On…	Talarowski M., Cohen D.A., Williamson S., Han B.	Innovative playgrounds: use, physical activity, and implications for health	2019	Public Health	10.1016/j.puhe.2019.06.002	Community health; Design; Physical activity; Playgrounds	Scopus
	n	n	n	n		Urban conurbation development affects contamination of HBCDs and TBBPA in soil. © 2019 Elsevier LtdHexabromocyclododecane (HBCD) and tetrabromobisphenol A (TBBPA) are legacy brominated flame retardants which are still produced and used in China. In this study, 187 surface soils from the Pearl River Delta (PRD) urban conurbation in China were collected, and the effects of urban conurbation develop…	Gao C.-J., Xia L.-L., Wu C.-C., Wong C.S., Guo Y.	The effects of prosperity indices and land use indicators of an urban conurbation on the occurrence of hexabromocyclododecanes and tetrabromobisphenol A in surface soil in South China	2019	Environmental Pollution	10.1016/j.envpol.2019.06.128	Hexabromocyclododecanes (HBCDs); Surface soil; Tetrabromobisphenol A (TBBPA); The Pearl River Delta (PRD) urban conurbation	Scopus
	y	n	y	y		The present study evaluated a social network typology of continuing care retirement community (CCRC) residents and examined it against their physical and emotional wellbeing. The social network typology was constructed, using a name-generator, followed by detailed questions about the characteristics of the individuals who make up the network and the nature of the relationship with them. Latent pr…	Ayalon L.	Social network type in the continuing care retirement community	2019	Archives of Gerontology and Geriatrics	10.1016/j.archger.2019.103900	Community; Residential; Social capital; Social network; Social relations	Scopus
	y	n	n	n		Crime and safety perceptions are commonly cited barriers to park use and physical activity (PA). Given the importance of parks as settings for outdoor recreation and physical activity, the presence of crime may have a detrimental effect on public health. This study uses objective police crime reports and observational park use data to assess type of crime and the time when the crime was committed…	Marquet O., Hipp J.A., Alberico C., Huang J.-H., Fry D., Mazak E., Lovasi G.S., Floyd M.F.	Short-term associations between objective crime, park-use, and park-based physical activity in low-income neighborhoods	2019	Preventive Medicine	10.1016/j.ypmed.2019.05.023	Children park use; Crime; Crime reports; Park physical activity; Park use	Scopus
	n	n	y	y		In Sweden, as in many other European countries, poor neighborhoods with ethnically diverse inhabitants and high crime rates have grown up around big cities in the last decades. We hypothesized that, compared with adolescents in advantaged neighborhoods, adolescents in disadvantaged neighborhoods would perceive their schools as relatively safe, due to their contrast with the more threatening and d…	Stattin H., Svensson Y., Korol L.	Schools can be supporting environments in disadvantaged neighborhoods	2019	International Journal of Behavioral Development	10.1177/0165025419833824	adolescents; delinquency; Disadvantaged neighborhoods; immigrant background; parent–child relations; school environment	Scopus
	n	y	y	y		Background: Adolescents engage in various combinations (typologies) of physical activity and sedentary behaviors, which impact their health and wellbeing in different ways. As such, there is a need to understand the factors that may inhibit or facilitate engagement in combinations of activity-related behaviors to help inform effective intervention strategies targeting those most in need. The aim …	Parker K.E., Salmon J., Villanueva K., Mavoa S., Veitch J., Brown H.L., Timperio A.	Ecological correlates of activity-related behavior typologies among adolescents	2019	BMC Public Health	10.1186/s12889-019-7386-9	Clustering; Correlates; Ecological framework; Geographic information systems; Physical activity; Sedentary behavior; Typologies	Scopus
满足代际活动差异的可持续空间	y	y	y	y		Social sustainability includes aspects of equity and is associated with two of the United Nations Sustainable Development goals focused on promoting good health and well-being for all ages. Yet, this pillar of sustainability is considered the least understood, as compared to economic and environmental components. To address this, our study focused on intergenerational engagement within residentia…	Washington T.L., Cushing D.F., Mackenzie J., Buys L., Trost S.	Fostering social sustainability through intergenerational engagement in Australian neighborhood parks	2019	Sustainability (Switzerland)	10.3390/su11164435	Intergenerational engagement; Parks; Residential neighborhood parks; Social sustainability; Wellbeing	Scopus
	n	n	y	n		There is a cross-sectional evidence that physical and social environments are linked to childhood adiposity. Evidence is scarce for the role of preconception, pregnancy, and early-life area-level characteristics in shaping childhood adiposity. We aimed to systematically review evidence for associations between physical and social environmental conditions experienced in these periods and childhood…	Wilding S., Ziauddeen N., Smith D., Roderick P., Alwan N.A.	Maternal and early-life area-level characteristics and childhood adiposity: A systematic review	2019	Obesity Reviews	10.1111/obr.12861	children; DOHaD; environment; obesity	Scopus
	n	n	n	n		This paper outlines the role of urban design in the relationship between public space and families with children. The quality of outside play in urban and suburban spaces is crucial for the physical, social and cognitive development of young children. By analysing three important daily living domains–street, green spaces and play spaces–through observations, surveys, workshops and interviews in t…	Krishnamurthy S.	Reclaiming spaces: child inclusive urban design	2019	Cities and Health	10.1080/23748834.2019.1586327	child-friendly cities; engagement; Urban design; urban spaces	Scopus
	n	n	y	y		The north-western city of Turin, Italy, well known for the FIAT car industry, representing the leading Italian example of a one-company town, ranks the highest Italian level of PM10 air pollution, among the worst in Europe. According to epidemiologists, children’s health in Turin is severely affected by air pollution, primarily originated from private motorized traffic. Based on this data, a comp…	Forni E., Negro E., Carlucci C., Nasso A., Struppek M.	Actions against air pollution in Turin for a healthy and playable city	2019	Cities and Health	10.1080/23748834.2019.1596045	air; Childhood; city; health; justice; playable; pollution	Scopus
	y	y	y	y		A co-design process can bring children into the design and development of public neighbourhood spaces as a way to ensure that their perspectives are represented in the design. The co-design process itself can also create resonance beyond the actors immediately involved and form a discursive forum for how visions and perceptions for public spaces are defined and vocalized in the wider community. O…	Winge L., Lamm B.	Making the red dot on the map - bringing children’s perspectives to the city planning agenda through visible co-design actions in public spaces	2019	Cities and Health	10.1080/23748834.2019.1604931	children; Co-design; design anthropology; healthy city; matters of concern; public hearing; public space	Scopus
	y	y	n	y		Facing the demographic changes is our common responsibility as researchers of all scientific disciplines. The forecasts based on statistical data show that in many countries in the nearest future the highest growth in population will be in the segment of 65-year-olds and older people. With age, mobility, intellectual ability and spatial orientation are reduced. Creating a proper living environmen…	Skalna B., Haupt P.	Urban spaces in residential areas as an environment for continuous prevention and rehabilitation - Design and benefits	2019	International Journal of Engineering and Advanced Technology	10.35940/ijeat.E1070.0785S319	Demographic changes; Emphasis; Forecasts; Population; Urban spaces	Scopus
	n	n	y	n		Background Since 2006 there has been substantial long-term investment in school-based child obesity prevention programs in New South Wales (Australia). Whether these programs have led to population level improvements in children’s weight status and weight-related behaviors are yet to be determined. The purpose of this study was to describe changes in children’s weight status and weight-related be…	Hardy L.L., MacNiven R., Esgin T., Mihrshahi S.	Cross-sectional changes in weight status and weight related behaviors among Australian children and Australian Indigenous children between 2010 and 2015	2019	PLoS ONE	10.1371/journal.pone.0211249		Scopus
	y	n	y	y		Background: We used the introduction of dedicated physical activity (PA) spaces in Rotterdam, the Netherlands, to study the impact of reducing distance to dedicated PA spaces on outdoor play and sedentary behavior, and to evaluate if these effects were similar between population subgroups. Methods: We included 1841 Dutch children from the Generation R Study who participated at two subsequent meas…	Mölenberg F.J.M., Noordzij J.M., Burdorf A., van Lenthe F.J.	New physical activity spaces in deprived neighborhoods: Does it change outdoor play and sedentary behavior? A natural experiment	2019	Health and Place	10.1016/j.healthplace.2019.102151	Built environment; Children; Equity effects; Natural experiment; Outdoor play; Physical activity spaces; Sedentary behavior	Scopus
	y	n	n	n		This study was conducted to investigate the concentrations, distributions, toxicities, and sources of polycyclic aromatic hydrocarbons (PAHs) in the soils from different areas in Ulsan, South Korea. Samples were collected from 41 sites, including a waste treatment facilities area (WA), traffic facilities area (TA), child playground area (CA), industrial area (IA), railroad facilities area (RA), o…	Jeon H.-D., Oh S.-Y.	Distribution, toxicity, and origins of polycyclic aromatic hydrocarbons in soils in Ulsan, South Korea	2019	Environmental Monitoring and Assessment	10.1007/s10661-019-7558-1	Carcinogenic PAHs; PAH; PAH origin index; TEQ	Scopus
不同文化背景的儿童有不同的游戏偏好空间	y	y	y	y		A continued decrease in outdoor play time among children has contributed to the decline in their overall physical activity levels. Creating safe and supportive neighborhood environments for outdoor play can help promote physical activity especially among children lacking private play areas. Further, children from different cultural backgrounds may be influenced by different factors when deciding …	Yoon J., Lee C.	Neighborhood outdoor play of White and Non-White Hispanic children: Cultural differences and environmental disparities	2019	Landscape and Urban Planning	10.1016/j.landurbplan.2019.01.010	Children; Environmental disparity; Ethnic difference; Outdoor play	Scopus
	n	n	n	n		Taking an everyday life setting, namely playgrounds, as a starting point, the paper foregrounds a nuanced analysis of the internal differentiations of the middle class’s positioning in regard to social diversity. In so doing, the paper contributes to debates on contemporary segregation research, (dis-)affiliation of the middle classes in inner-city diverse neighbourhoods and geographies of encoun…	Weck S.	‘Together apart’ or ‘apart together’?–middle-class parents’ choice of playgrounds and playground interactions in socially diverse neighbourhoods [“Ensemble séparément” ou “séparés ensemble”?–Choix de terrains de jeux de parents de classe moyenne et interactions sur le terrain de jeu dans des quartiers d’origine sociale différente] [¿‘Juntos separados' o 'separados juntos'? — La elección de plazas…	2019	Social and Cultural Geography	10.1080/14649365.2017.1373302	barrios del centro de la ciudad; clases medias; classes moyennes; crianza urbana; Dusseldorf/Alemania; Dusseldorf/Allemagne; Dusseldorf/Germany; encounter with difference; encuentro con la diferencia; inner-city neighbourhoods; Middle classes; playgrounds; plazas infantiles; quartiers du centre-ville; rencontre de la différence; terrains de jeux; urban parenting; éducation parentale urbaine	Scopus
	y	n	n	n		In the Europe of the mid-twentieth century, different ways of dealing with the links between the public place in the modern city and the needs of homo ludens emerged. Among them, we must highlight two complementary proposals: the one carried out by the English landscape artist Lady Allen of Hurtwood in some neighborhoods of London during the postwar years, where she claimed - from the field of so…	García-González M.C., Salvador-Guerrero, ORCID 0000-0001-6766-8695	About the children’s play space in the modern city: Lady Allen of Hurtwood versus Jakoba Mulder [Sobre el espacio de juego infantil en la ciudad moderna: Lady Allen of Hurtwood versus Jakoba Mulder]	2019	Ciudad y Territorio Estudios Territoriales		Europe; Jakoba mulder; Lady Allen of Hurtwood; Playgrounds; XX century	Scopus
	y	n	n	n		The United States lacks surveillance to monitor park use and conditions. The purpose of this study was to use the System for Observing Play and Recreation in Communities (SOPARC) as a surveillance tool to describe the conditions, user characteristics, and physical activity of a national sample of neighborhood parks at two time points. Using a stratified multistage sampling strategy, a representat…	Evenson K.R., Williamson S., Han B., McKenzie T.L., Cohen D.A.	United States’ neighborhood park use and physical activity over two years: The National Study of Neighborhood Parks	2019	Preventive Medicine	10.1016/j.ypmed.2019.03.027	Environment; Parks and recreation; Physical activity; Sedentary behavior; Surveillance	Scopus
	n	n	y	n		Aims: To gain knowledge about families’ experiences while staying in a hospital family house during their child's hospitalisation. Background: When a child is hospitalised with a chronic, serious or life-threatening disease, the entire family is stressed as normal everyday life is disrupted. In Denmark, accompanying the ill child to the paediatric wards is often possible only for one of the paren…	Dyekjær C.D., Dreyer P.	The family house—A safe haven: A qualitative study of families' experiences staying in a hospital family house during their children's hospitalisation	2019	Journal of Clinical Nursing	10.1111/jocn.14827	accommodation; families; family house; family nursing; healing environment; hermeneutic; hospitalised children; nursing; paediatric nursing; qualitative research	Scopus
	n	n	y	n		Background: Mental health problems are leading contributors to the global disease burden in adolescents. This study aims to highlight (1) salient context-specific factors that influence stress and coping among school-going adolescents across two urban sites in India; and (2) potential targets for preventing mental health difficulties. Methods: Focus group discussions were undertaken with a large …	Parikh R., Sapru M., Krishna M., Cuijpers P., Patel V., Michelson D.	"it is like a mind attack": Stress and coping among urban school-going adolescents in India	2019	BMC Psychology	10.1186/s40359-019-0306-z	Coping; India; Mental health; Schools; Stress	Scopus
	n	n	n	n		This study investigated the associations between the characteristics of the nearby physical environment with the total and domain-specific leisure-time sedentary behaviour (SB) in young people. The study included 1578 youth (9–18 years) from the UP&DOWN study. Total leisure-time SB was objectively-assessed by accelerometers. Participants self-reported the time spent during leisure-time in differe…	Cabanas-Sánchez V., Izquierdo-Gómez R., García-Cervantes L., Castro-Piñero J., Conde-Caveda J., Veiga O.L.	Environmental correlates of total and domain-specific sedentary behaviour in young people. The UP&DOWN study	2019	European Journal of Sport Science	10.1080/17461391.2018.1551425	computer; house; materials; media equipment; Neighbourhood; television	Scopus
	y	y	y	y		Through a questionnaire and Photo-Projective Methods (PPM), this study investigates how children perceive their neighbourhood environment for walking and outdoor play. It aims to understand what features children prefer when they walk and play in their neighbourhood. A total of 86 survey packages were mailed to households with children between 8 and 12 years old; 42 survey responses were returned…	Li C., Seymour M.	Children’s perceptions of neighbourhood environments for walking and outdoor play	2019	Landscape Research	10.1080/01426397.2018.1460336	children; Environmental perception; neighbourhood planning; outdoor play; walking	Scopus
	n	n	n	n		Background: Air pollution has been shown to promote cardiovascular disease in adults. Possible mechanisms include air pollution induced changes in arterial wall function and structure. Atherosclerotic vascular disease is a lifelong process and childhood exposure may play a critical role. We investigated whether air pollution is related to arterial wall changes in 5-year old children. To this aim,…	Ntarladima A.-M., Vaartjes I., Grobbee D.E., Dijst M., Schmitz O., Uiterwaal C., Dalmeijer G., Van Der Ent C., Hoek G., Karssenberg D.	Relations between air pollution and vascular development in 5-year old children: A cross-sectional study in the Netherlands	2019	Environmental Health: A Global Access Science Source	10.1186/s12940-019-0487-1	Air pollution; Carotid artery; Children; Exposure assessment	Scopus
	y	n	y	n		Objectives This study examined the relationship between environmental correlates and children's sedentary time (ST), light physical activity (LPA) and moderate-to-vigorous physical activity (MVPA) in preschool children. Design Cross-sectional study Setting A birth cohort in Drenthe, a northern province and relatively rural area of the Netherlands. Participants Valid data both for the ActiGraph an…	Lu C., Huang G., Corpeleijn E.	Environmental correlates of sedentary time and physical activity in preschool children living in a relatively rural setting in the netherlands: A cross-sectional analysis of the gecko drenthe cohort	2019	BMJ Open	10.1136/bmjopen-2018-027468	Environmental correlates; Parental support; Physical activity; Preschool children; Sedentary behaviours; Traffic safety	Scopus
	n	n	y	n		Background: Although previous studies have reported negative associations between exposure to air pollution and cognition, studies of the effects of prenatal and postnatal exposures in early childhood have been limited. Objectives: We sought to assess the role exposure to fine particulate matter (PM2.5) during different prenatal and postnatal windows may play in children’s cognitive development a…	Rivas I., Basagaña X., Cirach M., López-Vicente M., Suades-González E., Garcia-Esteban R., Álvarez-Pedrerol M., Dadvand P., Sunyer J.	Association between early life exposure to air pollution and working memory and attention	2019	Environmental Health Perspectives	10.1289/EHP3169		Scopus
	n	n	n	n		Safety concerns are a primary deterrent to bicycling. Bicycle infrastructure is both preferred and safer for bicycling. In this paper, we examine the association between availability of bicycle infrastructure and perceptions of bicycling safety amongst over 3000 bicyclists living in six large Canadian and US cities. In three repeat cross-sectional surveys (2012, 2013 and 2014), adults living in B…	Branion-Calles M., Nelson T., Fuller D., Gauvin L., Winters M.	Associations between individual characteristics, availability of bicycle infrastructure, and city-wide safety perceptions of bicycling: A cross-sectional survey of bicyclists in 6 Canadian and U.S. cities	2019	Transportation Research Part A: Policy and Practice	10.1016/j.tra.2018.10.024	Bicycle infrastructure; Bicycling; Bike score; Built environment; Perceived safety	Scopus
	y	n	n	y		There is a need to explore variations in children’s safety perceptions for different settings (home, school and neighbourhood) and their relationship with subjective well-being (this including satisfaction with safety and satisfaction with life as whole) by comparing a variety of cultural contexts. A further objective is to explore to what extent gender, age group (10 and 12-year-olds) and level …	González-Carrasco M., Casas F., Ben-Arieh A., Savahl S., Tiliouine H.	Children’s Perspectives and Evaluations of Safety in Diverse Settings and Their Subjective Well-Being: A Multi-National Approach	2019	Applied Research in Quality of Life	10.1007/s11482-018-9594-3	Binary logistic regression; Children; Perceptions of safety; Satisfaction with safety; Subjective well-being	Scopus
	n	n	n	n		Rubber surfacing is often used in playgrounds due to its potential injury prevention benefits and as a way to recycle waste tires. Available research on chemicals in recycled rubber has focused on synthetic turf applications, but is limited for playground rubber surfacing. Potential lead contamination from vulcanizing agents used in rubber surfacing are a possible concern; however this has not be…	Almansour K.S., Arisco N.J., Woo M.K., Young A.S., Adamkiewicz G., Hart J.E.	Playground lead levels in rubber, soil, sand, and mulch surfaces in Boston	2019	PLoS ONE	10.1371/journal.pone.0216156		Scopus
	y	n	y	y		OBJECTIVES: Our purpose in this study was to adapt and validate the Traumatic Events Screening Inventory (TESI) as a primary-care childhood adversity screening tool for children living in vulnerable neighborhoods using a community-partnered approach. METHODS: In this cross-sectional, descriptive study, we used a sample of 261 children (3-16 years old) who were seeking services at a Federally Qual…	Choi K.R., McCreary M., Ford J.D., Koushkaki S.R., Kenan K.N., Zima B.T.	Validation of the traumatic events screening inventory for ACES	2019	Pediatrics	10.1542/peds.2018-2546		Scopus
	n	n	y	n		Over the last decade, cyberbullying has emerged as a public health concern among young people. Cyberbullying refers to intentional harmful behaviors and communication carried out repeatedly using electronic media. Considerable research has demonstrated the detrimental and long-lasting effects of cyberbullying involvement. This article draws on a social–ecological perspective to identify protectiv…	Chester K.L., Magnusson J., Klemera E., Spencer N.H., Brooks F.	The Mitigating Role of Ecological Health Assets in Adolescent Cyberbullying Victimization	2019	Youth and Society	10.1177/0044118X16673281	aggressive behavior/bullying; neighborhood context; parent support; victimization	Scopus
	n	n	n	n		Prior research indicates that socioeconomic disadvantage is associated with prefrontal cortical (PFC) development in childhood and adolescence, however the mechanisms of this link are unclear. This study investigated whether DNA methylation of the brain-derived neurotrophic factor (BDNF, which plays a key role in synaptic plasticity), mediated the association between neighborhood disadvantage and…	Wrigglesworth J., Ryan J., Vijayakumar N., Whittle S.	Brain-derived neurotrophic factor DNA methylation mediates the association between neighborhood disadvantage and adolescent brain structure	2019	Psychiatry Research - Neuroimaging	10.1016/j.pscychresns.2018.12.012	Brain derived neurotrophic factor; Cortical thickness; DNA methylation; Epigenetics; Prefrontal cortex; Socioeconomic disadvantage	Scopus
	n	n	n	n		Wood used in playground structures built prior to 2004 was pressure-treated with chromated copper arsenate (CCA) which has been associated with negative health and environmental impacts. Given the prevalence and lack of maintenance of these aging play structures in rural northeastern US, the aim of this study was to determine the distribution of As (total, speciated and bioaccessible) in surface …	Deramos King C.M., Dozier C.S., Campbell J.L., Curry E.D., Godri Pollitt K.J.	Long-term leaching of arsenic from pressure-treated playground structures in the northeastern United States	2019	Science of the Total Environment	10.1016/j.scitotenv.2018.11.315	Arsenic speciation; Bioaccessible arsenic; Bioavailability; CCA	Scopus
	n	n	y	n		Kawasaki disease is the leading cause of acquired childhood heart disease in most developed countries, but the etiology of the disease is unknown. An aberrant immune response to some environmental triggers may play a role and involuntary exposure to tobacco smoke can alter immune functions. We thus prospectively examined the association between early childhood exposure to maternal smoking and the…	Yorifuji T., Tsukahara H., Doi H.	Early childhood exposure to maternal smoking and Kawasaki Disease: A longitudinal survey in Japan	2019	Science of the Total Environment	10.1016/j.scitotenv.2018.11.194	Early childhood exposure; Epidemiology; Mucocutaneous lymph node syndrome; Smoking	Scopus
	n	n	y	n		In 2010, the province of Ontario introduced a new universal two-year play-based full-day kindergarten program. The authors exploited the phasing-in of this program over five years, allowing a natural experiment in which children from full-day kindergarten could be compared with those from half-day kindergarten in matched neighborhoods. Children (N = 592) were followed from kindergarten to Grade 2…	Patricia Pelletier J., Corter J.E.	A longitudinal comparison of learning outcomes in full-day and half-day kindergarten	2019	Journal of Educational Research	10.1080/00220671.2018.1486280	Full-day kindergarten; learning outcomes; longitudinal; play-based; self-regulation	Scopus
	y	y	y	y		Recent research suggests that numerous positive physical, cognitive, and social benefits can be derived from independent mobility and play agency amongst children, necessitating an understanding of how physical and social environments facilitate this development. This study involved parents, and children aged 9–13 from twelve households in the neighbourhood of Riverdale in Toronto. Using a mappin…	Furneaux A., Manaugh K.	Eyes on the alley: children’s appropriation of alley space in Riverdale, Toronto	2019	Children's Geographies	10.1080/14733285.2018.1482409	activity spaces; age-friendly cities; alleys; Children’s independent mobility	Scopus
	y	n	y	y		Connecting to nature and spending time outdoors as children have been indicated as predictors of environmentally responsible behavior. This study examined whether a residential outdoor environmental education (ROEE) program contributed to the development of children’s connection to nature and their attitudes and involvement in spending time outdoors. Fifth-grade students (n = 163) in Pennsylvania…	Mullenbach L.E., Andrejewski R.G., Mowen A.J.	Connecting children to nature through residential outdoor environmental education	2019	Environmental Education Research	10.1080/13504622.2018.1458215	Children; evaluation; nature connection; outdoor play; residential outdoor environmental education	Scopus
	n	n	n	n		INTRODUCTION AND OBJECTIVES: This volume provides an update of the health status of the populations living in the National Priority Contaminated Sites (NPCSs) included in the SENTIERI Project. This update is part of an epidemiological surveillance programme carried out in NPCSs, promoted by the Italian Ministry of Health as a further step of a project started in 2006, when the health status of re…	Zona A., Iavarone I., Buzzoni C., Conti S., Santoro M., Fazzo L., Pasetto R., Pirastu R., Bruno C., Ancona C., Bianchi F., Forastiere F., Manno V., Minelli G., Minerba A., Minichilli F., Stoppa G., Pierini A., Ricci P., Scondotto S., Bisceglia L., Cernigliaro A., Ranzi A., Comba P., Gruppo di lavoro SENTIERI, Gruppo di lavoro AIRTUM-SENTIERI, Gruppo di lavoro Malformazioni congenite-SENTIERI	SENTIERI: Epidemiological Study of Residents in National Priority Contaminated Sites. Fifth Report [SENTIERI: Studio epidemiologico nazionale dei territori e degli insediamenti esposti a rischio da inquinamento. Quinto Rapporto]	2019	Epidemiologia e prevenzione	10.19191/EP19.2-3.S1.032		Scopus
	n	n	n	n		The aim of this study was to investigate soil contamination with trace elements and fluoride at sites in Szczecin (NW Poland) where economic activity was historically associated with the use of trace metals. As the Polish legislation does not recognize the lasting impact of historical pollution on soils, land developers are not obliged to determine soil pollution in the new residential areas, inc…	Kupiec M., Pieńkowski P., Bosiacka B., Gutowska I., Kupnicka P., Prokopowicz A., Chlubek D., Baranowska-Bosiacka I.	Old and new threats—trace metals and fluoride contamination in soils at Defunct Smithy sites	2019	International Journal of Environmental Research and Public Health	10.3390/ijerph16050819	Fluorides; Historical industry; Trace metals; Urban soil pollution	Scopus
环境变迁后的游戏方式转变	y	y	y	y		Migration to a different culture may affect opportunities for play and social interaction, essential for children's developing cognitive and social skills. We asked Somali migrant women about experiences of childhood (both while growing up themselves, and subsequent observations) in Somalia and the UK. In Somalia, they described a supportive, connected community and safe environment enabling chil…	Allport T., Mace J., Farah F., Yusuf F., Mahdjoubi L., Redwood S.	‘Like a life in a cage’: Understanding child play and social interaction in Somali refugee families in the UK	2019	Health and Place	10.1016/j.healthplace.2019.01.019	Child; Development; Environment; Migration; Somali	Scopus
	n	y	y	n		Objectives: The deprivation amplification hypothesis postulates that the socially disadvantaged are exposed to further structural deprivation by their residential environment such that social inequalities are therefore amplified. To date, no publication has investigated deprivation amplification solely using playgrounds; the present health geography study investigates this hypothesis with regard …	Schneider S., Bolbos A., Fessler J., Buck C.	Deprivation amplification due to structural disadvantage? Playgrounds as important physical activity resources for children and adolescents	2019	Public Health	10.1016/j.puhe.2018.11.016	Adolescent; Child; Environmental impact; Environmental justice; Health	Scopus
	n	n	n	n		Potentially toxic elements such as heavy metals are ubiquitous in the environment. Risk-based environmental management relies upon identifying pollution sources, pathways, and the exposed population. In a Chinese urban setting, many residents live in high-rise buildings without private gardens. Therefore, the main residential risk of exposure to contaminated soils and dusts may be associated with…	Jin Y., O'Connor D., Ok Y.S., Tsang D.C.W., Liu A., Hou D.	Assessment of sources of heavy metals in soil and dust at children's playgrounds in Beijing using GIS and multivariate statistical analysis	2019	Environment International	10.1016/j.envint.2019.01.024	Air pollution; Atmospheric deposition; GIS; Heavy metals; Soil contamination	Scopus
	n	n	y	n		Background: Little is known about the exposure of young children to radiofrequency electromagnetic fields (RF-EMF) and potentially associated health effects. We assessed the relationship of RF-EMF exposure from different sources and screen time exposure with emotional and behavioural problems in 5-year-old children. Methods: Cross-sectional study including 3102 children aged 5 years from the Amst…	Guxens M., Vermeulen R., Steenkamer I., Beekhuizen J., Vrijkotte T.G.M., Kromhout H., Huss A.	Radiofrequency electromagnetic fields, screen time, and emotional and behavioural problems in 5-year-old children	2019	International Journal of Hygiene and Environmental Health	10.1016/j.ijheh.2018.09.006		Scopus
	n	n	n	n		Background: Sensitization to common environmental aeroallergens plays a significant role in the pathogenesis and severity of respiratory allergic disorders, specifically asthma and allergic rhinitis. Understanding sensitization patterns helps clinicians tailor care more effectively. This study examines patterns of sensitization to aeroallergens in subjects suspected of having an allergic disease …	Ahmed H., Ospina M.B., Sideri K., Vliagoftis H.	Retrospective analysis of aeroallergen's sensitization patterns in Edmonton, Canada	2019	Allergy, Asthma and Clinical Immunology	10.1186/s13223-019-0320-y	Aeroallergens; Atopy; Sensitization; Skin prick testing	Scopus
	y	y	y	y		Background: In Belgium, as in many other countries, the juvenile practice of physical activity is insufficient. A growing attention has been paid to environmental factors that may influence physical activity but with inconsistent findings. This study aims to estimate the association between daily life environment characteristics and physical activity among children 10 to 13 years old in Wallonia …	Pedroni C., Dujeu M., Moreau N., Lebacq T., Méroc E., Godin I., Castetbon K.	Environmental correlates of physical activity among children 10 to 13 years old in Wallonia (Belgium)	2019	BMC Public Health	10.1186/s12889-019-6509-7	Children; Living environment; Physical activity	Scopus
	y	y	y	y		The focus of this study is on examining sufficiency and quality of play space in a densely populated city from the spatial perspective. The study employed a three-stage multilevel mixed-method design using spatial analysis, user questionnaire, and site surveys. Provision of play space was assessed based on location, user perception, and proximity to residential areas and roads. The spatial distri…	Lai P.-C., Low C.-T.	Provision of convenient play space in a densely populated city	2019	International Journal of Environmental Research and Public Health	10.3390/ijerph16040651	Children; City; Hong Kong; Play space; Public space; Urban environment	Scopus
	n	n	y	n		Two trends play an increasing role in shaping the long-term prospects of children across the United States: a growing STEM (science, technology, engineering, and mathematics)-based economy and rising income segregation. Together, they suggest that the future well-being of U.S. children may be based increasingly on the contemporary interplay of mathematical learning and neighborhood environments. …	Pearman F.A., II	The Effect of Neighborhood Poverty on Math Achievement: Evidence From a Value-Added Design	2019	Education and Urban Society	10.1177/0013124517715066	causal inference; children; mathematics; neighborhood effects; school effects	Scopus
	n	n	n	n		Background: This study explores sociodemographic disparities in residential proximity to unconventional gas development (UGD) among pregnant women. Methods: We conducted a secondary analysis using data from a retrospective birth cohort of 164,658 women with a live birth or fetal death from November 2010 to 2012 in the 24-county area comprising the Barnett Shale play, in North Texas. We considered…	Ish J., Symanski E., Whitworth K.W.	Exploring disparities in maternal residential proximity to unconventional gas development in the barnett shale in north Texas	2019	International Journal of Environmental Research and Public Health	10.3390/ijerph16030298	Barnett Shale; Environmental justice; Index of concentration at the extremes; Maternal and child health; Unconventional gas development	Scopus
	n	n	n	n		Blood lead toxicity has been prominently related to vehicular emissions. The lead is a carcinogenic metal systematically damages bones and central nervous system. The present investigation is focused on likely impacts of environmental and socioeconomic factors on the concentration of blood lead levels in children. The findings of the study show that the highest blood lead levels were observed in …	Rashid A., Bhat R.A., Qadri H., Mehmood M.A., Shafiq-ur-Rehman	Environmental and socioeconomic factors induced blood lead in children: an investigation from Kashmir, India	2019	Environmental Monitoring and Assessment	10.1007/s10661-019-7220-y	Blood lead levels; Environmental factors; Lead exposure; School proximity; Socioeconomic; Traffic density	Scopus
	n	n	n	n		Lead contamination is widespread across China, posing a serious public health concern. In quantifying child lead exposure, established health risk assessment (HRA) approaches often take into account residential soil lead levels. However, this may not constitute a significant exposure source for children in urban mainland China, where the population mainly dwell in high-rise buildings without back…	Peng T., O'Connor D., Zhao B., Jin Y., Zhang Y., Tian L., Zheng N., Li X., Hou D.	Spatial distribution of lead contamination in soil and equipment dust at children's playgrounds in Beijing, China	2019	Environmental Pollution	10.1016/j.envpol.2018.11.011	Blood lead levels; Community children's playground; Dust; Lead	Scopus
	n	n	n	n		Exposure to phthalate esters (PAEs) poses health risks to humans. Much research has been performed evaluating PAE levels in foodstuffs, river sediment and drinking water, but little attention has been paid to their presence in urban outdoor environments where human activities are highly intense. Here we evaluated PAE presence and distribution in street dust in Kaohsiung, the most industrialized c…	Lee S.-T., Lin C., Vu C.T., Chen Y.-C., Chen K.-S., Villanueva M.C.	How human activities in commercial areas contribute to phthalate ester pollution in street dust of Taiwan	2019	Science of the Total Environment	10.1016/j.scitotenv.2018.07.362	Commercial areas; Consumer exposure; Daily intakes; Night markets; Phthalate esters (PAEs); Street dust	Scopus
	n	n	n	n		By the interwar years, Parisian parks—artificial pockets of nature in the densely built city—had become a locus of debates around “child-friendly play spaces.” The diversity of Paris’s young population in age, gender, and social status meant that the criteria of what constituted “child-friendly” was constantly in flux and that definitions of childhood remained fluid. Interwar Parisian parks becam…	Sahin E.	Sandcastles, ball games, and scooters: Unearthing children’s play in the public parks of interwar paris	2019	Historical Reflections	10.3167/hrrh.2019.450203	Interwar period; Outdoor play; Paris; Public parks; Risk; Urban childhood	Scopus
	n	y	y	y		Residential neighbourhoods are vital parts of cities, accommodating various activity patterns that reflect the daily life for residents. Each residential neighbourhood is characterised by housing typology and urban pattern, which has been formed and transformed overtime. The city centre of Tripoli has experienced continuous growth and witnessed intensive development programs that transformed resi…	Remali A.M., Abudib H.	Interrogating the characteristics of residential neighbourhoods in the city of Tripoli / Libya	2019	Open House International		Residential neighbourhood; Space profile; Tripoli; Walking tour assessment	Scopus
	n	y	y	y		Background: Sociodemographic and environmental factors play important roles in determining both indoor and outdoor play activities in children. Methods: The Built Environment and Active Play Study assessed neighborhood playability for children (7–12 y), based on parental report of their children’s active play behaviors, neighborhood characteristics, and geographic locations. Simple logistic regre…	Puett R.C., Huang D., Montresor-Lopez J., Ray R., Roberts J.D.	Sociodemographic and environmental determinants of indoor versus outdoor active play among children living in the Washington, DC area	2019	Journal of Physical Activity and Health	10.1123/jpah.2019-0142	BEAP Study; Built environment; Indoor physical activity; Outdoor physical activity	Scopus
	n	y	y	n		Introduction. Children’s playgrounds are an integral part of the infrastructure of urban and rural settlements, a place of active recreation and development of children. Analysis of the regulatory framework governing the location and environmental condition of the territory of children’s playgrounds, the order of their operation allowed establishing the absence of a single document that permits t…	Baltrukova T.B., Janushanets O.I., Ivanova O.I., Frolova N.M., Noskov S.N., Levanchuk A.V.	Hygienic evaluation of the dislocation and state of recreations for children in the city of Saint-Petersburg	2019	Gigiena i Sanitariya	10.18821/0016-9900-2019-98-6-619-624	Air pollution; Playgrounds; Sanitary and hygienic assessment; Soil pollution	Scopus
	n	y	y	n		Background: Playgrounds are a central resource when it comes to physical activity among minors. This study assesses the association between area deprivation and the quality of playgrounds. Methods: All playgrounds in the city of Mannheim, Germany (145 km2, 311,000 inhabitants) were visited between July 2016 and January 2017 as part of a systematic audit. Each playground's amenities, attractivenes…	Buck C., Bolbos A., Schneider S.	Do poorer children have poorer playgrounds? A geographically weighted analysis of attractiveness, cleanliness, and safety of playgrounds in affluent and deprived urban neighborhoods	2019	Journal of Physical Activity and Health	10.1123/jpah.2018-0177	Child; Deprivation amplification; Environmental impact; Environmental justice; Health	Scopus
	n	n	y	n		Background/Aims Recent studies suggest that air pollution may play a role in gastrointestinal disorders. However, the effect of long-term exposure to air pollution on childhood irritable bowel syndrome (IBS) is unclear. Hence, we conducted a nationwide cohort study to investigate the association between long-term air pollution exposure and the incidence and risk of IBS in Taiwanese children durin…	Tan T.-K., Saps M., Lin C.-L., Wei C.-C.	Is long-term ambient air pollutant exposure a risk factor for irritable bowel syndrome in children? A 12-year longitudinal cohort study	2019	Journal of Neurogastroenterology and Motility	10.5056/jnm18135	Air pollutant; Child; Follow-up studies; Irritable bowel syndrome	Scopus
	y	y	y	y		Neighborhoods have traditionally served as important settings for children’s independent activities, but use has declined dramatically. Global positioning system (GPS) monitors, activity diaries, annotated maps, and Google Earth–enabled interviews captured the neighborhood perceptions, usage, and independent activity ranges of twenty-three children (nine to twelve years) from London, Canada. Whil…	Loebach J., Gilliland J.	Examining the Social and Built Environment Factors Influencing Children’s Independent Use of Their Neighborhoods and the Experience of Local Settings as Child-Friendly	2019	Journal of Planning Education and Research	10.1177/0739456X19828444	activity spaces; affordances; child-friendly environments; community planning; GPS; independent mobility; neighborhood use; play; urban form	Scopus
	n	n	n	n		Environmental factors, preventive medical care, and behaviors play a role in childhood obesity. This study used the National Survey of Children's Health, 2011-2012, for 42,828 children, ages 10-17 years. Greater percent of children in the overweight/obese category performed no moderate-to-vigorous physical activity: 11.9 (10.6, 13.3) as compared to children in the underweight/normal weight catego…	Vaccaro J.A., Zarini G.G., Huffman F.G.	Parental Perceptions of Child's Medical Care and Neighborhood and Child's Behavioral Risk Factors for Obesity in U.S. Children by Body Mass Index Classification	2019	Journal of Environmental and Public Health	10.1155/2019/3737194		Scopus
	n	n	n	n		Background: Previous research shows that mortality varies significantly by residential context; however, the nature of this variation is unclear. Some studies report higher mortality levels in urban compared to rural areas, whereas others suggest elevated mortality in rural areas or a complex U-shaped relationship. Further, the extent to which compositional factors explain urban-rural mortality v…	Allan R., Williamson P., Kulu H.	Gendered mortality differentials over the rural-urban continuum: The analysis of census linked longitudinal data from England and Wales	2019	Social Science and Medicine	10.1016/j.socscimed.2018.10.005	England and wales; Gender; Health; Mortality; Rural; Survival analysis; Urban	Scopus
无摘要						[无可用摘要]	Gerlach A.J., Jenkins E., Hodgson K.	Disrupting assumptions of risky play in the context of structural marginalization: A community engagement project in a Canadian inner-city neighbourhood	2019	Health and Place	10.1016/j.healthplace.2018.11.008		Scopus
	n	n	n	n		Introduction: Several urban neighborhoods in Philadelphia, Pennsylvania, have a history of soil, household lead paint, and potential lead-emitting industry contamination. Objectives: To (1) describe blood lead levels (BLLs) in target neighborhoods, (2) identify risk factors and sources of lead exposure, (3) describe household environmental lead levels, and (4) compare results with existing data. …	Dignam T., Pomales A., Werner L., Newbern E.C., Hodge J., Nielsen J., Grober A., Scruton K., Young R., Kelly J., Brown M.J.	Assessment of Child Lead Exposure in a Philadelphia Community, 2014	2019	Journal of Public Health Management and Practice	10.1097/PHH.0000000000000711	housing; lead dust; lead paint; lead poisoning	Scopus
	n	n	n	n		Background: Social and environmental stressors may modify associations between environmental pollutants and asthma symptoms. We examined if neighborhood asthma prevalence (higher: HAPN vs. lower: LAPN), a surrogate for underlying risk factors for asthma, modified the relationship between pollutants and urgent asthma visits. Methods: Through zip code, home addresses were linked to New York City Co…	Lovinsky-Desir S., Acosta L.M., Rundle A.G., Miller R.L., Goldstein I.F., Jacobson J.S., Chillrud S.N., Perzanowski M.S.	Air pollution, urgent asthma medical visits and the modifying effect of neighborhood asthma prevalence	2019	Pediatric Research	10.1038/s41390-018-0189-3		Scopus
	n	n	y	n		Previous studies have focused on the role anchor institutions play in community development. However, less attention has been directed to how hospitals can effectively partner with community-organizations and residents as part of population health efforts. This article examines community views of one initiative developed by a major American children’s hospital in partnership with local community …	Franz B., Skinner D., Kerr A.M., Penfold R., Kelleher K.	Hospital–Community Partnerships: Facilitating Communication for Population Health on Columbus’ South Side	2018	Health Communication	10.1080/10410236.2017.1359033		Scopus
	y	y	y	y		This study aims to compare lifestyles and environmental perceptions of urban and rural children. Ninety-two students completed a questionnaire and were given two means (drawing or wring) to express their thoughts regarding (1) the activity and play areas, (2) their neighborhood and (3) their city. The results showed higher levels of parental supervision and restrictions on the independent mobilit…	Çubukçu E., Kahraman D.E., Yavaşal Ö.F.	Comparing the lifestyles and environmental perceptions of rural and urban children: a case study in Turkey	2018	Journal of Housing and the Built Environment	10.1007/s10901-018-9594-5	Children; Cities and neighborhoods; Drawings; Environmental perception	Scopus
	n	n	y	y		Physical activity and screen viewing are associated with cardio-metabolic risk factors, psychological wellbeing, and academic performance among children. Across the last generation, children’s physical activity and screen viewing behaviours have changed, coinciding with changes to the home and neighbourhood environment. This study aimed to qualitatively explore parents’ views on their 8–9-year-ol…	Solomon-Moore E., Emm-Collison L.G., Sebire S.J., Toumpakari Z., Thompson J.L., Lawlor D.A., Jago R.	“In my day…”-Parents’ Views on Children’s Physical Activity and Screen Viewing in Relation to Their Own Childhood	2018	International Journal of Environmental Research and Public Health	10.3390/ijerph15112547	Childhood; Generations; Independent mobility; Physical activity; Qualitative; Screen viewing	Scopus
	y	y	n	y		The current study examined racial/ethnic differences in use of parks and park facilities and features and self-reported park use and perceptions. We conducted observations in a nationally representative sample of 193 neighborhood parks in 27 US cities over a 1-week period between April and August of 2016 using the System of Observing Play and Recreation in Communities (SOPARC). To determine the p…	Vaughan C.A., Cohen D.A., Han B.	How Do Racial/Ethnic Groups Differ in Their Use of Neighborhood Parks? Findings from the National Study of Neighborhood Parks	2018	Journal of Urban Health	10.1007/s11524-018-0278-y	Neighborhood parks; Park observations; Park use; Park visits; Racial/ethnic differences	Scopus
	n	n	y	y		Low birthweight (<2500 g), associated with low socioeconomic status, has a negative effect on cognition and development. This is especially true for fluid intelligence and language. This study aimed to examine and identify (1) fluid intelligence and language in low- and adequate-birthweight children in a low-income Brazilian neighborhood and (2) the environmental factors that could account for po…	Pacheco M.J.T., Gonçalves H.M.C., Ribeiro T.G.D.S., Gonçalves T.H.N.M., Pacheco M.B., Ribeiro M.R.C., Ribeiro L.B., Carvalho A.P., Cabral J.L., Artoni L.G., Vantini M.A.B., Tomás R.C.C., Engel De Abreu P., Laurence P.G., Macedo E.C.	Low weight at birth and unfavorable socioeconomic background: effects on language and fluid intelligence	2018	Vulnerable Children and Youth Studies	10.1080/17450128.2018.1524613	early childhood education; fluid reasoning/cognition; Language/Cognitive deficits; premature children; vulnerability	Scopus
	n	n	y	n		Breastfeeding is an important public health issue worldwide. Breastfeeding rates in the United Kingdom, particularly for exclusive breastfeeding, are low compared with other OECD countries, despite its wide-ranging health benefits for both mother and child. There is evidence that deprivation in the structural and social organisation of neighbourhoods is associated with adverse child outcomes. Thi…	Peregrino A.B., Watt R.G., Heilmann A., Jivraj S.	Breastfeeding practices in the United Kingdom: Is the neighbourhood context important?	2018	Maternal and Child Nutrition	10.1111/mcn.12626	breastfeeding; deprivation; maternal perception; neighbourhood; social environment; social inequalities	Scopus
	n	n	n	n		Exposure to low levels of lead in children can cause cognitive deficits (reduced IQ) and behavioral changes such as reduced attention span and increased antisocial behavior. There are no mandatory limits on lead in paint in Israel, with the exception of paints used on toys and children's furniture. However, paints in playgrounds and public areas may be a source of exposure to lead in young childr…	Berman T., Barnett-Itzhaki Z., Reicher S., Ardi R., Shammai Y., Aruas L., Negev M.	Lead in spray paint and painted surfaces in playgrounds and public areas in Israel: Results of a pilot study	2018	Science of the Total Environment	10.1016/j.scitotenv.2018.05.005		Scopus
	n	n	y	n		Little is known about the relative influences of neighborhood and school on the alcohol socialization process. Survey data from the Young in Oslo Study (N = 10,038, mean age 17.1 years, 52% girls) were used to investigate the details of such influences, using cross-classified multilevel models. School and neighborhood contexts were equally important for ordinary alcohol use; however, neighborhood…	Pedersen W., Bakken A., von Soest T.	Neighborhood or School? Influences on Alcohol Consumption and Heavy Episodic Drinking Among Urban Adolescents	2018	Journal of Youth and Adolescence	10.1007/s10964-017-0787-0	Alcohol; Alcohol problems; Cross-classified models; Neighborhood; School	Scopus
	n	n	n	n		Young children are infected by a diverse range of enteric pathogens in high disease burden settings, suggesting pathogen contamination of the environment is equally diverse. This study aimed to characterize across- and within-neighborhood diversity in enteric pathogen contamination of public domains in urban informal settlements of Kisumu, Kenya, and to assess the relationship between pathogen de…	Baker K.K., Senesac R., Sewell D., Sen Gupta A., Cumming O., Mumma J.	Fecal Fingerprints of Enteric Pathogen Contamination in Public Environments of Kisumu, Kenya, Associated with Human Sanitation Conditions and Domestic Animals	2018	Environmental Science and Technology	10.1021/acs.est.8b01528		Scopus
	n	n	y	y		Background: High-income countries like Australia play a vital role in resettling refugees from around the world, half of whom are children and adolescents. Informed by an ecological framework, this study examined the post-migration adjustment of refugee children and adolescents 2-3 years after arrival to Australia. We aimed to estimate the overall rate of adjustment among young refugees and explo…	Lau W., Silove D., Edwards B., Forbes D., Bryant R., McFarlane A., Hadzi-Pavlovic D., Steel Z., Nickerson A., Van Hooff M., Felmingham K., Cowlishaw S., Alkemade N., Kartal D., O'Donnell M.	Adjustment of refugee children and adolescents in Australia: Outcomes from wave three of the Building a New Life in Australia study	2018	BMC Medicine	10.1186/s12916-018-1124-5	Adjustment; Adolescents; Children; Ecological; Mental health; Psychosocial; Refugee; Resettlement; Strengths and Difficulties Questionnaire	Scopus
	n	n	n	n		Objectives: Schools can play an important role in addressing the effects of traumatic stress on students by providing prevention, early intervention, and intensive treatment for children exposed to trauma. This article aims to describe key domains for implementing trauma-informed practices in schools. Design: The Substance Abuse and Mental Health Administration (SAMHSA) has identified trauma-info…	Kataoka S.H., Vona P., Acuña A., Jaycox L., Escudero P., Rojas C., Ramirez E., Langley A., Stein B.D.	Applying a trauma informed school systems approach: Examples from school community-academic partnerships	2018	Ethnicity and Disease	10.18865/ed.28.S2.417	Community; Community participation; Mental health services; School-based services; Traumatic stress disorder	Scopus
	n	n	n	y		Many scholars have found evidence that low-income neighborhoods contain fewer supermarkets, but there is a lack of consensus regarding whether and how this matters to residents. A few qualitative studies have asked food desert residents about their experiences of their food environments, while a small number of other studies have utilized spatial analyses to examine actual shopping behaviors. To …	MacNell L.	A geo-ethnographic analysis of low-income rural and urban women's food shopping behaviors	2018	Appetite	10.1016/j.appet.2018.05.147	Food access; Food deserts; Food shopping; Geographic information systems (GIS); Mapping; Mixed methods	Scopus
	n	n	n	n		Aim: Extremely low-frequency magnetic fields (ELF-MFs) are emitted by electrical household appliances, wiring, meter boxes, conductive plumbing, power lines and transformers. Some of the studies investigating the link between ELF-MFs and health problems have not adequately characterized the magnetic field exposure of subjects, as they did not always measure residential magnetic fields or measure …	Halgamuge M.N., McLean L.	Measurement and analysis of power-frequency magnetic fields in residences: Results from a pilot study	2018	Measurement: Journal of the International Measurement Confederation	10.1016/j.measurement.2018.05.007	Extremely low frequency magnetic fields; Indoor environments; New data collection model; Public health; Residential power frequency	Scopus
内容丰富，多处可以引用,如成人辅助	y	y	y	y		This paper rethinks geographical approaches to children's play in the Global North. One narrowly conceived strand of past research considered the erosion of outdoor free play, but overlooked children's views of alternative play environments (e.g., out-of-school activities). A separate thread examined the feminisation of employment and growth in childcare, but investigations into children's play i…	Holloway S.L., Pimlott-Wilson H.	Reconceptualising play: Balancing childcare, extra-curricular activities and free play in contemporary childhoods	2018	Transactions of the Institute of British Geographers	10.1111/tran.12230	after school activities; class; geography of play; working mother; work–life balance; wraparound care	Scopus
	n	n	n	n		With rates of obesity among adults and youth rising in Canada, it is clear that the current approaches currently used to reduce the prevalence of obesity, with an emphasis on individual weight management interventions focused on restrictive dieting, are not proving successful at a population level. Given that obesity is associated with poor physical and mental health outcomes, is placing a multi-…	Shentow-Bewsh R., Zuberi D.	Reducing the prevalence of obesity in Canada: a call to action	2018	Social Work in Public Health	10.1080/19371918.2018.1482252	Canada; Interventions; Obesity; Policy Reforms	Scopus
	y	n	y	y		Aims and objectives: The importance of childhood physical activity is widely recognised. Helping children to articulate their opinions is a crucial factor in improving their health and well-being, yet the field is predominantly focused on adult-led quantitative methods and lacks deeper understanding from a child perspective. Methods: This paper draws on experiences from a Danish study in which ch…	Hayball F.Z.L., Pawlowski C.S.	Using participatory approaches with children to better understand their physical activity behaviour	2018	Health Education Journal	10.1177/0017896918759567	Children; outdoor environments; participatory approaches; physical activity behaviour; visual data	Scopus
	n	n	y	n		Obesity is a major public health issue affecting rising medical costs and contributing to morbidity and premature mortality. We aimed to identify factors that may play a role in obesity and physical activity at the individual and environmental/neighborhood levels. We analyzed data from an adult sample who were parents of students enrolled in a school-based health and wellness program. The sample …	Towne S.D., Jr., Lopez M.L., Li Y., Smith M.L., Warren J.L., Evans A.E., Ory M.G.	Examining the Role of Income Inequality and Neighborhood Walkability on Obesity and Physical Activity among Low-Income Hispanic Adults	2018	Journal of Immigrant and Minority Health	10.1007/s10903-017-0625-1	Health and place; Hispanic; Income inequality; Low income; Minority; Physical activity	Scopus
	y	n	y	n		Background: Although the active transportation (AT) indicator received an F grade on the 2016 US Report Card on Physical Activity for Children and Youth, this AT assessment excluded public transportation. An objective of the Built Environment and Active Play Study was to assess youth AT, including public transportation, among Washington, DC area children in relation to parental perceptions of nei…	Roberts J.D., Rodkey L., Ray R., Saelens B.E.	Do not forget about public transportation: Analysis of the association of active transportation to school among Washington, DC area children with parental perceived built environment measures	2018	Journal of Physical Activity and Health	10.1123/jpah.2017-0266	BEAP study; Cross-sectional study; Sample diversity; Sociodemographics; United States	Scopus
	n	n	y	n		Objective: Despite nearly three in four African American (AA) children being born to unwed mothers, AA fathers maintain relatively high levels of parenting engagement, whether or not they live with their children. While father involvement correlates with decreased adverse child health outcomes, the nature of AA father involvement in child health—including engagement in the pediatric medical home—…	Bignall O.N.-R., Raglin Bignall W.J., Vaughn L.M., Unaka N.I.	Fathers Know Best: Inner-City African American Fathers’ Perceptions Regarding Their Involvement in the Pediatric Medical Home	2018	Journal of Racial and Ethnic Health Disparities	10.1007/s40615-017-0407-4	African American (AA) children; Fathers; Group level assessments; Pediatric medical home	Scopus
	n	n	y	n		Latinos are the largest and fastest growing minority population group in the United States, and children in low-income Latino families are at elevated risk of becoming overweight or having obesity. A child’s home is an important social environment in which he/she develops and maintains dietary and physical activity (PA) habits that ultimately impact weight status. Previous research suggests the p…	Lindsay A.C., Wallington S.F., Lees F.D., Greaney M.L.	Exploring how the home environment influences eating and physical activity habits of low-income, latino children of predominantly immigrant families: A qualitative study	2018	International Journal of Environmental Research and Public Health	10.3390/ijerph15050978	Healthy eating; Home environment; Latino; Obesity; Parents; Physical activity	Scopus
	n	n	y	n		The author contextualizes the social construction of body weight among 31 adolescents living in low-income neighborhoods in Southern Ontario, Canada. Theoretically informed by critical “obesity” discourse and the temporal turn in youth geographies, this article explores the ways in which participants defined acceptance and risk of fatness, the fluidity of their own body weight, and the connection…	Dean J.	Imagining body size over time: Adolescents’ relational perspectives on body weight and place	2018	Fat Studies	10.1080/21604851.2017.1372994	Critical geographies of “obesity”; fatness; relationality; temporality; youth	Scopus
	n	n	n	n		A household’s wealth provides an important form of economic security for a family, as well as enabling parents to invest in children to help them realize their aspirations. Yet in the United States, wealth inequality between white families and families of color who are earning the same incomes has reached startling levels. The racial wealth gap, which reduces the opportunities available to Africa…	Thomas H., Mann A., Meschede T.	Race and Location: The Role Neighborhoods Play in Family Wealth and Well-Being	2018	American Journal of Economics and Sociology	10.1111/ajes.12239		Scopus
	n	n	y	n		BACKGROUND: We evaluated associations between use of public places for physical activity and active leisure (PAAL) and their distances from subjects’ homes and indicators of overweight and obesity, among schoolchildren from different socioeconomic levels, in the city of Florianópolis, Brazil. DESIGN AND SETTING: Cross-sectional study conducted on a sample of 2,152 schoolchildren aged 7 to 14 year…	Rossi C.E., Correa E.N., das Neves J., Gabriel C.G., Benedet J., Rech C.R., de Vasconcelos F.A.G.	Body mass index and association with use of and distance from places for physical activity and active leisure among schoolchildren in Brazil. Cross-sectional study	2018	Sao Paulo Medical Journal	10.1590/1516-3180.2017.0347020118	Environment and public health; Overweight; Socioeconomic factors; Youth	Scopus
	n	n	y	n		Introduction: Reaching preschool-aged children to establish healthy lifestyle habits, including physical activity, is an important component of obesity prevention efforts. However, few studies have examined family child care homes where nearly 1 million children receive care. Study design: A pre- and post-intervention evaluation without a control group was conducted to evaluate what changes occur…	Kao J., Woodward-Lopez G., Kuo E.S., James P., Becker C.M., Lenhart K., Boyle K., Williamson D., Rauzon S.	Improvements in Physical Activity Opportunities: Results From a Community-Based Family Child Care Intervention	2018	American Journal of Preventive Medicine	10.1016/j.amepre.2018.01.005		Scopus
	n	n	y	n		This study examined the impact of community and neighborhood on time spent computer gaming. Computer gaming for over 20 hours a week was set as the cutoff line for "engaged use" of computer games. For the analysis, this study analyzed data for about 1,800 subjects who participated in the Korean Children and Youth Panel Survey. The main findings are as follows: first, structural community characte…	Lim T.T., Jung S.Y., Kim E.	The Effects of Social Environments on Time Spent Gaming: Focusing on the Effects of Communities and Neighborhoods	2018	Cyberpsychology, Behavior, and Social Networking	10.1089/cyber.2017.0439	community; computer game; engaged use; neighborhood	Scopus
	y	n	y	y		The current study examined the nexus of neighborhood disorder—in the form of physical disorder (e.g., broken glass and vandalism) and social disorder (e.g., public drinking and lewd conduct)—and physical activity (PA) in urban public parks to inform public policy addressing chronic disease in at-risk populations. Five hundred and twenty-two unique observations were conducted in 22 public parks fr…	Douglas J.A., Briones M.D., Bauer E.Z., Trujillo M., Lopez M., Subica A.M.	Social and environmental determinants of physical activity in urban parks: Testing a neighborhood disorder model	2018	Preventive Medicine	10.1016/j.ypmed.2018.01.013	Neighborhood disorder; Physical activity; Public health; Public parks	Scopus
	y	y	y	y		Aim: Safe neighbourhood environments can provide important spaces for child activity and well-being. Self-explaining roads (SERs), which reduce vehicle speeds by changing neighbourhood street design, are an intervention with known safety benefits. However, little is known about children's experiences of SERs. Methods: We engaged schoolchildren in developing a project to articulate children's pers…	Ryan R., Hosking J., Wilkinson-Meyers L., Ameratunga S.	Children's perceptions of a ‘self-explaining road’ intervention to improve neighbourhood safety	2018	Journal of Paediatrics and Child Health	10.1111/jpc.13776	children; neighbourhoods; play; road safety; self-explaining roads	Scopus
	n	n	y	n		In public health research, it has been well established that geographic location plays an important role in influencing health outcomes. In recent years, there has been an increased emphasis on the impact of neighborhood or contextual factors as potential risk factors for childhood obesity. Some neighborhood factors relevant to childhood obesity include access to food sources, access to recreatio…	Grant L.P., Gennings C., Wickham E.P., III, Chapman D., Sun S., Wheeler D.C.	Modeling pediatric body mass index and neighborhood environment at different spatial scales	2018	International Journal of Environmental Research and Public Health	10.3390/ijerph15030473	Body mass index; Lasso; Model selection; Obesity; Spatial scale	Scopus
	n	n	y	n		Young children are infected by a diverse variety of enteric pathogens in low-income, high-burden countries. Little is known about which conditions pose the greatest risk for enteric pathogen exposure and infection. Young children frequently play in residential public areas around their household, including areas contaminated by human and animal feces, suggesting these exposures are particularly h…	Medgyesi D., Sewell D., Senesac R., Cumming O., Mumma J., Baker K.K.	The landscape of enteric pathogen exposure of young children in public domains of low-income, urban Kenya: The influence of exposure pathway and spatial range of play on multi-pathogen exposure risks	2018	PLoS Neglected Tropical Diseases	10.1371/journal.pntd.0007292		Scopus
大论文可以参考，阐述专家记忆与非专家记忆对环境的感知，	y	n	n	n		Background and aims of the study: The transaction between people and space/objects is interpreted in environmental psychology as a both conscious and unconscious matching process (human-environment fit). The constant change in the human-environment transaction (psycho-bio-contextual progress) plays an important role during the lifelong development. According to the model of place attachment and p…	Dúll A., Krisztina S., Attila H., Péter B., Julianna S.	First arena of socio-physical independency: Comparison of mental maps of architecture and psychology university students [A szociofizikai önállóság elso színtere: Építészhallgatók és térlaikus egyetemi hallgatók mentális térképábrázolásainak összehasonlítása]	2018	Magyar Pszichologiai Szemle	10.1556/0016.2018.73.1.6	Alloyed qualitative; Environmental psychology; Expert; Mental mapping; Non-expert depiction of place; Quantitative research strategy; Socio-physical independency; Transdisciplinary analysis	Scopus
	n	n	y	n		To examine the influence of neighborhood environment on childhood overweight and obesity in Shelby County Schools, Tennessee, and whether and to what extent that influence varies by age, gender, and the specific environment characteristics. 41,283 students were surveyed covering both individual-level covariates and several objective measures of neighborhood environment. Multilevel logistic regres…	Yang Y., Jiang Y., Xu Y., Mzayek F., Levy M.	A cross-sectional study of the influence of neighborhood environment on childhood overweight and obesity: Variation by age, gender, and environment characteristics	2018	Preventive Medicine	10.1016/j.ypmed.2017.12.021	Age; Childhood obesity; Childhood overweight; Gender; Neighborhood environment	Scopus
	n	n	y	n		Background: Guided by the Socialization Model of Child Behavior (SMCB), this cross-sectional study examined direct and indirect associations of parental cognitions and behavior, the home and neighborhood environment, and toddlers' personal attributes with toddlers' physical activity and screen time. Methods: Participants included 193 toddlers (1.6 ± 0.2 years) from the Parents' Role in Establishi…	Lee E.-Y., Hesketh K.D., Rhodes R.E., Rinaldi C.M., Spence J.C., Carson V.	Role of parental and environmental characteristics in toddlers' physical activity and screen time: Bayesian analysis of structural equation models	2018	International Journal of Behavioral Nutrition and Physical Activity	10.1186/s12966-018-0649-5	Barrier self-efficacy; Bayesian theorem; Outcome expectations; Parental modeling; Screen time limits; Socialization model of child behavior	Scopus
	n	n	y	n		Background: The purpose of this study was to investigate whether there is a bi-directional relationship between sleep characteristics (time in bed, sleep duration, sleep chronology, and sleep efficiency) and time spent participating in outdoor active play among children. Methods: Participants consisted of 433 children aged 10-13 years from Kingston, ON, Canada. Time in bed, sleep duration, sleep …	Lin Y., Borghese M.M., Janssen I.	Bi-directional association between sleep and outdoor active play among 10-13 year olds	2018	BMC Public Health	10.1186/s12889-018-5122-5	Child; Physical activity; Sleep	Scopus
	n	n	n	y		Aims: The aim of this paper is to advocate for the importance of meaningful leisure time for young people from a health-promotion perspective using experiences from two youth centres in multicultural neighbourhoods in Sweden. Methods: In this practice-based study, data were collected between 2012 and 2014 at two youth centres in multicultural, socially deprived suburbs in Sweden using surveys wit…	Fredriksson I., Geidne S., Eriksson C.	Leisure-time youth centres as health-promoting settings: Experiences from multicultural neighbourhoods in Sweden	2018	Scandinavian Journal of Public Health	10.1177/1403494817743900	Health promotion; leisure-time activities; mixed methods; multicultural; settings based	Scopus
	n	n	n	n		In this research, a visiting class on disaster preparedness education for higher-grade elementary school students (10–11 years old) was conducted in Wakayama prefecture, which is exposed to Nankai Trough earthquakes, and in different parts of the three prefectures whose coasts were most affected by the 2011 Great East Japan Earthquake: Fukushima (Western inland), Miyagi (North side out of the tsu…	Yasuda M., Muramoto T., Nouchi R.	Assessment of educational methods for improving children’s awareness of tsunamis and other natural disasters: Focusing on changes in awareness and regional characteristics in Japan	2018	Geosciences (Switzerland)	10.3390/geosciences8020047	Awareness of disaster reduction; Disaster-preparedness education; Regional characteristics; Tsunami disaster education	Scopus
	n	n	n	n		A cross-sectional study was performed between school term dates 2014 and 2015 to diagnose intestinal parasites in dogs and children living with them. The socio-environmental characteristics and hygiene practices of the children were also evaluated in terms of risk factors for parasitic infection of periurban neighbourhoods of La Plata (Buenos Aires, Argentina). Serial coproparasitological samples…	Cociancic P., Zonta M.L., Navone G.T.	A cross-sectional study of intestinal parasitoses in dogs and children of the periurban area of La Plata (Buenos Aires, Argentina): Zoonotic importance and implications in public health	2018	Zoonoses and Public Health	10.1111/zph.12408	Argentina; children; dogs; intestinal parasites; risk factors; zoonosis	Scopus
	n	n	y	n		The current study sought to understand commercially sexually exploited (CSE) youths’ health care experiences, barriers to care, and recommendations for improving health care services. We conducted focus groups (N = 5) with 18 CSE youth from February 2015 through May 2016 at two group homes serving CSE youth in Southern California. We performed thematic content analysis to identify emergent themes…	Ijadi-Maghsoodi R., Bath E., Cook M., Textor L., Barnert E.	Commercially sexually exploited youths’ health care experiences, barriers, and recommendations: A qualitative analysis	2018	Child Abuse and Neglect	10.1016/j.chiabu.2017.11.002	Commercial sexual exploitation of children; Qualitative; Sex trafficking	Scopus
	n	n	n	n		Many studies reveal a strong impact of childhood maltreatment on language development, mainly resulting in shorter utterances, less rich vocabulary, or a delay in grammatical complexity. However, different theories suggest the possibility for resilience—a positive adaptation to an otherwise adverse environment—in children who experienced childhood maltreatment. Here, we investigated different mea…	Knolle F., Vallotton C.D., Ayoub C.C.	Maltreated Children Use More Grammatical Negations	2018	Journal of Child and Family Studies	10.1007/s10826-017-0905-3	Abuse; Childhood maltreatment; Language acquisition; Negativity bias; Resilience	Scopus
	n	n	n	n		This article investigated selected American plays to elaborate on the provision of aged care in the home or in a residential care setting; specifically, the maintenance of privacy and autonomy, how they relate to an individual’s ability to maintain their sense of self and social relations, and how the disruption of privacy and autonomy can result in significant effects are evaluated. In Sam Shepa…	Chang C.-Y.	Aged care and the concept of home in contemporary American drama	2018	International Journal of the Humanities	10.18848/1447-9508/CGP/v16i01/1-9	Aged care; Autonomy; Home; Home space; Privacy	Scopus
可以学学研究方法	y	y	y	n		Research Framework: While Beirut may be best known for its Pine Forest (recently reopened to the public), the city remains sorely lacking public spaces. The few available places have, for the most part, been left fallow, and the small recreational spaces dedicated to children are rare. Young couples are slowly leaving the city (especially with the increase in the price of real estate) and it seem…	Azzam C.	Recapturing Beirut for the benefit of children and teenagers via school infrastructure [La reconquête de Beyrouth pour les enfants et les adolescents au prisme des infrastructures scolaires]	2018	Enfances, Familles, Generations		Beirut; Children; Parents; Public policies; Public spaces; School; School architecture; Teenagers	Scopus
	n	n	n	n		Background: Early-life exposure to traffic-related air pollution exacerbates childhood asthma, but it is unclear what role it plays in asthma development. Methods: The association between exposure to primary mobile source pollutants during pregnancy and during infancy and asthma incidence by ages 2 through 6 was examined in the Kaiser Air Pollution and Pediatric Asthma Study, a racially diverse b…	Pennington A.F., Strickland M.J., Klein M., Zhai X., Bates J.T., Drews-Botsch C., Hansen C., Russell A.G., Tolbert P.E., Darrow L.A.	Exposure to Mobile Source Air Pollution in Early-life and Childhood Asthma Incidence: The Kaiser Air Pollution and Pediatric Asthma Study	2018	Epidemiology	10.1097/EDE.0000000000000754		Scopus
	y	y	y	y		The aim of this study is to investigate how children behave in the landscape of three Chinese residential quarters. Based on information collected through investigation using Principal Component Analysis and Cluster Analysis, the residential landscapes are classified into ten types, each of which can be generally described according to four spatial factors-- exposure, proximity to water, accessib…	Zeng R., Li Z.	Analysis of the relationship between landscape and children's behaviour in Chinese residential quarters	2018	Journal of Asian Architecture and Building Engineering	10.3130/jaabe.17.47	Children's behaviour; Cluster; Principal component; Residential landscape; Visualization	Scopus
	n	n	n	n		Alcohol use among Muslims has received scant research attention, and little is known about the factors that underlie Arab Muslim adolescents' use of alcohol. The data used in this study is based on a large and representative sample of 2,948 Arab Muslim students from Israel, aged 11-18. The results showed that almost 10% of the adolescents reported using alcohol. The findings indicated that greate…	Eseed R., Khoury-Kassabri M.	Alcohol use among arab muslim adolescents: A mediation-moderation model of family, peer, and community factors	2018	American Journal of Orthopsychiatry	10.1037/ort0000263	Alcohol use; Community violence; Muslim adolescents; Parent communication; Peer delinquency	Scopus
	y	y	y	y		This study aims to understand how children perceive their environment, exploring the affordances children perceive to influence their physical activity (PA) behaviour when outside. Participants included boys and girls aged 10–12 years (n = 15) living in Scotland. Children's visual and verbal representations of their perceived environment were analysed to assess environmental determinants of PA. T…	Hayball F., McCrorie P., Kirk A., Gibson A.-M., Ellaway A.	Exploring Children's Perceptions of their Local Environment in Relation to Time Spent Outside	2018	Children and Society	10.1111/chso.12217	affordances; children; neighbourhoods; outdoors; participatory research; perceptions; physical activity	Scopus
	n	n	y	n		Neighborhoods are critical contexts for adolescent development, but little attention has been paid to how neighborhood characteristics play a role in positive youth development (PYD), notably among predominantly African American youth. This study examined distinct features of the neighborhood, including youth-serving institutional resources (YSI) and safety, as they relate to PYD among adolescent…	Anderson S., McDermott E.R., Elliott M.C., Donlan A.E., Aasland K., Zaff J.F.	Youth-serving institutional resources and neighborhood safety: Ties with positive youth development	2018	American Journal of Orthopsychiatry	10.1037/ort0000220	Adolescence; Neighborhood resources; Neighborhood safety; Positive youth development	Scopus
	n	n	y	n		Mount Isa, Queensland, is one of three Australian cities with significant lead emissions due to nonferrous mining and smelting. Unlike the two other cities with lead mines or smelters, Mount Isa currently has no system of annual, systematic, community-wide blood lead level testing; and testing rates among Indigenous children are low. In previous screenings, this group of children has been shown t…	Green D., Sullivan M., Cooper N., Dean A., Marquez C.	A pilot study of children’s blood lead levels in Mount Isa, Queensland	2017	International Journal of Environmental Research and Public Health	10.3390/ijerph14121567	Children’s blood lead level; Indigenous; Lead smelter; Leadcare II point of care; Mount Isa	Scopus
	n	n	y	y		This study explored parents’ physical activity (PA) knowledge and perceptions of children’s out-of-school PA to formatively contribute to a family-based intervention design. Eleven telephone interviews were conducted with parents of children aged 10–11 years. Child and parent data were triangulated and family case studies were written. Most parents were unaware of the UK child PA guidelines and w…	Noonan R.J., Boddy L.M., Fairclough S.J., Knowles Z.R.	Parental perceptions on childrens out-of-school physical activity and family-based physical activity	2017	Early Child Development and Care	10.1080/03004430.2016.1194409	family; independent mobility; intervention; outdoor play; Physical activity	Scopus
待定	y	y	y	y		Childhood physical activity (PA) is important for health across the lifespan. Time pre-schoolers spend outdoors, which has been associated with more PA, is likely influenced by parents’ perception of neighbourhood informal social control relevant to pre-schoolers' PA, defined as the willingness of neighbours to intervene to ensure social order and a safe community environment for young children's…	Cerin E., Suen Y.N., Barnett A., Huang W.Y.J., Mellecker R.R.	Validity of a scale of neighbourhood informal social control relevant to pre-schoolers’ physical activity: A cross-sectional study	2017	SSM - Population Health	10.1016/j.ssmph.2016.11.007	Collective efficacy; Hong Kong; Physical activity; Preschool-age children; Safety; Scale validity	Scopus
	n	n	n	n		Background: Intestinal parasitoses are a major concern for public health, especially in children from middle and low-income populations of tropical and subtropical areas. We examined the presence and co-infection of parasites in humans as well as parasitic environmental contamination in Puerto Iguazú, Argentina. We explored the environmental and socio-demographic characteristics of the persistenc…	Rivero M.R., De Angelo C., Nuñez P., Salas M., Motta C.E., Chiaretta A., Salomón O.D., Liang S.	Environmental and socio-demographic individual, family and neighborhood factors associated with children intestinal parasitoses at Iguazú, in the subtropical northern border of Argentina	2017	PLoS Neglected Tropical Diseases	10.1371/journal.pntd.0006098		Scopus
	n	y	y	y		Sedentary behavior and physical inactivity are significant contributors to youth obesity in the United States. Neighborhood dog walking is an outlet for physical activity (PA). Therefore, understanding the relationship between built environment, dog ownership, and youth PA is essential. This study examined the influence of dog ownership and parental built environment perceptions on children’s PA …	Roberts J.D., Rodkey L., Grisham C., Ray R.	The influence of family dog ownership and parental perceived built environment measures on children’s physical activity within the Washington, DC area	2017	International Journal of Environmental Research and Public Health	10.3390/ijerph14111398	Built environment; Dog ownership; Parental perception; Physical activity	Scopus
	n	n	n	y		Background: Evidence is mounting to suggest a causal relationship between the built environment and people's physical activity behaviours, particularly active transport. The evidence base has been hindered to date by restricted consideration of cost and economic factors associated with built environment interventions, investigation of socioeconomic or ethnic differences in intervention effects, a…	Smith M., Hosking J., Woodward A., Witten K., MacMillan A., Field A., Baas P., Mackie H.	Systematic literature review of built environment effects on physical activity and active transport - an update and new findings on health equity	2017	International Journal of Behavioral Nutrition and Physical Activity	10.1186/s12966-017-0613-9	Causation; Cycling; Health equality; Playgrounds; Urban form; Walkability; Walking	Scopus
	y	n	y	y		Background: The prevalence of obesity among Latino children is alarmingly high, when compared to non-Latino White children. Low-income Latino parents living in urban areas, even if they are well-educated, face obstacles that shape familial health behaviors. This study used qualitative methods to explore parents' experiences in providing meals and opportunities to play to their children aged 2 to …	Penilla C., Tschann J.M., Sanchez-Vaznaugh E.V., Flores E., Ozer E.J.	Obstacles to preventing obesity in children aged 2 to 5 years: Latino mothers' and fathers' experiences and perceptions of their urban environments	2017	International Journal of Behavioral Nutrition and Physical Activity	10.1186/s12966-017-0605-9	Childhood obesity; Fathers; Latino; Parent feeding behavior; Urban environments	Scopus
	y	n	n	y		Disseminating public health recommendations to community members is an important step in protecting the public’s health. We describe a community–academic partnership comprising health-based organizations, community groups, academia, and government organizations. This partnership undertook an iterative process to develop an outreach plan, educational materials, and activities to bring lead-poisoni…	Newman N.C., Elam S., Igoe C., Jones C., Menrath W., Porter D., Haynes E.N.	A community–academic partnership to reduce lead exposure from an elevated roadway demolition, Cincinnati, Ohio, 2012	2017	Public Health Reports	10.1177/0033354917732756	Childhood lead poisoning prevention; Community–academic partnership	Scopus
	n	n	y	n		Local street cultures may appear more or less “extreme,” depending on several contextual factors. Using focus groups, the current study aimed to explore what children, aged 7 to 12 years, think of the assumption that parents play an important role on the street to increase safety in the public domain. Involvement of parents can either be helpful or contribute to escalation of the conflict. Childr…	van Dijken M., Stams G.-J., de Winter M.	Children's experiences and perceptions of street culture, parental supervision, and parental mediation in an urban neighborhood	2017	Journal of Community Psychology	10.1002/jcop.21906		Scopus
	n	n	n	n		In city playgrounds, there is a potential risk of harming children’s health by contamination coming from anthropogenic activities. With the aim to determinate the sources and the risk of hazardous elements, soil samples were collected in 19 selected playgrounds of different urban and rural areas from the Rio Grande do Sul state (Brazil). The concentration of 23 metals and metalloids and lead isot…	Gredilla A., Fdez-Ortiz de Vallejuelo S., Gomez-Nubla L., Carrero J.A., de Leão F.B., Madariaga J.M., Silva L.F.O.	Are children playgrounds safe play areas? Inorganic analysis and lead isotope ratios for contamination assessment in recreational (Brazilian) parks	2017	Environmental Science and Pollution Research	10.1007/s11356-017-9831-6	Chemometric analysis; Human health; ICP-MS; Lead isotopic ratio; Metals; Normalized-and-Weighted Average Concentration; Playgrounds	Scopus
	n	n	y	n		Parents' concern about children's safety is a recurring theme in studies exploring children's independent mobility and play. However, few studies have investigated neighbourhood features influencing parents' fear of strangers harming their child, nor the extent to which this fear is influenced by socio-economic status (SES). We explored i) parents' perceived risk of, and fear of, stranger danger;…	Francis J., Martin K., Wood L., Foster S.	‘I'll be driving you to school for the rest of your life’: A qualitative study of parents' fear of stranger danger	2017	Journal of Environmental Psychology	10.1016/j.jenvp.2017.07.004	Children; Fear; Neighbourhood; Parents; Qualitative research; Stranger danger	Scopus
	n	n	n	y		The hot summer and cold winter zone (HSCW) plays a significant role in residential energy consumption in China because of climate, policy, and social-economic factors. Accordingly, occupant heating behaviors and associated social-psychological factors are essential elements in understanding energy consumption. This study presents a new investigation on the demographic factors, building characteri…	Cui Y., Yan D., Chen C.-F.	Exploring the factors and motivations influencing heating behavioral patterns and future energy use intentions in the hot summer and cold winter climate zone of China	2017	Energy and Buildings	10.1016/j.enbuild.2017.07.068	Heating; Hot summer and cold winter (HSCW) zone; Occupant behavior; Residential energy usage	Scopus
	n	n	y	n		Early childhood is an important period for development. Parents play an important role in structuring children's physical and psychosocial environments. Much remains unknown about the best methods for engaging parents in health promotion programs. It is critical that programs meet the needs of the families while encouraging the use of positive parenting strategies. The article describes how one p…	Richerson J., Pendleton A., Davis D.W.	A Community Arts-Based Parent Program	2017	Clinical Pediatrics	10.1177/0009922816678819	arts; CATCH grant; community participation; early childhood; parenting	Scopus
	n	n	y	y		Although evidence indicates that neighborhoods affect educational outcomes, relatively little research has explored the mechanisms thought to mediate these effects. This study investigates whether school poverty mediates the effect of neighborhood context on academic achievement. Specifically, it uses longitudinal data from the Panel Study of Income Dynamics, counterfactual methods, and a value-a…	Wodtke G.T., Parbst M.	Neighborhoods, Schools, and Academic Achievement: A Formal Mediation Analysis of Contextual Effects on Reading and Mathematics Abilities	2017	Demography	10.1007/s13524-017-0603-1	Academic achievement; Mediation; Neighborhoods; Poverty; Schools	Scopus
	n	n	n	n		In the present study, the occurrence, concentrations, and distribution of organophosphate esters (OPEs) were studied in surface soil and street dust samples collected from different sites of Chongqing, a metropolitan city in western China. Furthermore, nondietary daily intakes (DIs) of OPEs only through dust ingestion absorption were assessed between toddlers and adults. The ∑OPEs contents ranged…	He M.-J., Yang T., Yang Z.-H., Li Q., Wei S.-Q.	Occurrence and Distribution of Organophosphate Esters in Surface Soil and Street Dust from Chongqing, China: Implications for Human Exposure	2017	Archives of Environmental Contamination and Toxicology	10.1007/s00244-017-0432-7		Scopus
	y	y	y	y		This study aimed to investigate relationships between near-home street patterns and children's time spent outdoors (TSO). Participants were 60 (n = 60) school-age Dhaka children, 7–11 years old (16 girls and 44 boys) selected by a two-phase cluster sampling method. Data were collected from September 2010 to June 2011 by visiting each of 60 children's homes. Children's mean TSOs (in minutes) were …	Monsur M., Mansur M., Islam M.Z.	Are children living on dead-end streets more active? Near-home street patterns and school-going children's time spent outdoors in Dhaka, Bangladesh	2017	Preventive Medicine	10.1016/j.ypmed.2016.11.016	Behavior; Child; Environmental impact; Motor activity	Scopus
	n	n	n	y		Developments in the conceptualisation of childhood have prompted a fundamental shift in young people’s position within social research. Central to this has been the growing recognition of children’s agency within the landscapes of power between child participants and adult researchers. Participatory research has rooted itself in this paradigm, gaining status from its principles of social inclusio…	Davidson E.	Saying it like it is? Power, participation and research involving young people	2017	Social Inclusion	10.17645/si.v5i3.967	Children’s rights; Participation; Power; Resistance; UK; Voice; Young people	Scopus
待定	y	y	y	y		Background: This study aims to investigate whether mothers’ perceived neighbourhood environment is associated with outdoor playtime of 2- to 3.5-year-old children.Methods: Cross-sectional analyses were conducted using data from the Healthy Beginnings Trial (HBT). Data on children’s outdoor playtime and mothers’ perceived neighbourhood environment were collected through face-to-face interviews wit…	Xu H., Wen L.M., Hardy L.L., Rissel C.	Mothers’ perceived neighbourhood environment and outdoor play of 2- to 3.5-year-old children: Findings from the healthy beginnings trial	2017	International Journal of Environmental Research and Public Health	10.3390/ijerph14091082	Neighbourhood environment; Outdoor play; Perceptions; Physical activity; Young children	Scopus
	n	n	n	n		Background: There is evidence from existing literature that ambient air pollutant exposure in early childhood likely plays an important role in asthma exacerbation and other respiratory symptoms, with greater effect among asthmatic children. However, there is inconclusive evidence on the role of ambient air pollutant exposures in relation to increasing asthma prevalence as well as asthma inductio…	Olaniyan T., Jeebhay M., Röösli M., Naidoo R., Baatjies R., Künzil N., Tsai M., Davey M., De Hoogh K., Berman D., Parker B., Leaner J., Dalvie M.A.	A prospective cohort study on ambient air pollution and respiratory morbidities including childhood asthma in adolescents from the western Cape Province: Study protocol	2017	BMC Public Health	10.1186/s12889-017-4726-5	Airway inflammation; Allergic diseases; Ambient air pollution; Childhood asthma; Environmental pollution; Lung function; Outdoor air pollution; Pollens; Respiratory morbidities; Traffic-related pollutants	Scopus
	y	n	n	y		The purpose of this study is to analyse the effects of changes in neighbourhood environment due to the Crime Prevention Through Environmental Design (CPTED) project on residents’ social activities and sense of community through a case study of Cheonan Safe Village Project. The study conducted an observing survey and questionnaire survey in order to collect data, and a total of 314 residents’ soci…	Seo S.Y., Lee K.H.	Effects of changes in neighbourhood environment due to the CPTED project on residents’ social activities and sense of community: a case study on the Cheonan Safe Village Project in Korea	2017	International Journal of Urban Sciences	10.1080/12265934.2017.1298462	CPTED project; perceived neighbourhood environment; sense of community; social activities	Scopus
	n	y	y	y		Introduction Urban green space and other recreational facilities are associated with physical activity. For adolescents living in multistory housing, public outdoor spaces that support physical activity may play an important role in activity promotion strategies. However, stronger evidence for a relation between the built environment and adolescent physical activity is scarce. Design A natural ex…	Andersen H.B., Christiansen L.B., Klinker C.D., Ersbøll A.K., Troelsen J., Kerr J., Schipperijn J.	Increases in Use and Activity Due to Urban Renewal: Effect of a Natural Experiment	2017	American Journal of Preventive Medicine	10.1016/j.amepre.2017.03.010		Scopus
	n	n	n	n		Objective. The aim was to assess environmental factors associated with disease flare in juvenile and adult dermatomyositis (DM).Methods. An online survey of DM patients from the USA and Canada examined smoking, sun exposure, infections, medications, vaccines, stressful life events and physical activity during the 6 months before flares, or in the past 6 months in patients without flares. Differen…	Mamyrova G., Rider L.G., Ehrlich A., Jones O., Pachman L.M., Nickeson R., Criscone-Schreiber L.G., Jung L.K., Miller F.W., Katz J.D.	Environmental factors associated with disease flare in juvenile and adult dermatomyositis	2017	Rheumatology (United Kingdom)	10.1093/rheumatology/kex162	Dermatomyositis; Disease flare; Environmental factors; Juvenile dermatomyositis	Scopus
	y	n	n	n		Physical inactivity is a known risk factor for obesity and a number of chronic diseases. Modifying the physical features of neighborhoods to provide residents with equitable and convenient access to spaces for physical activity (PA) is a promising strategy for promoting PA. Public urban recreation spaces (e.g., parks) play an important role in promoting PA and are potentially an important neighbo…	Salvo D., Banda J.A., Sheats J.L., Winter S.J., Lopes dos Santos D., King A.C.	Impacts of a Temporary Urban Pop-Up Park on Physical Activity and Other Individual- and Community-Level Outcomes	2017	Journal of Urban Health	10.1007/s11524-017-0167-9	Built environment; Parks and public spaces; Physical activity; Pop-up parks; SOPARC	Scopus
	y	y	y	y		Outdoor activity spaces have very significant influences on children's growth and development. While being one of the most important spaces for children, their living environments have differentiated with the urbanization process in China. This study aims to examine the territorial selection, territorial psychology and territorial behavior of children 8–12 years old when playing outdoors from the…	Wang F., Ruan H., Chieh Wang H., Zong Y., Zhen F.	Create, control and have territories or secret places: A comparative study of children's play territoriality in their daily outdoor environments between Beijing's urban villages and modern residential areas	2017	Habitat International	10.1016/j.habitatint.2017.05.012	Child-friendly spaces; Community design; Outdoor activities; Residential areas; Territoriality; Urban villages	Scopus
看不出是游戏空间	n	n	y	n		Children’s outdoors play (OP) is an important source of physical activity that has been decreasing in recent years due to changes in neighborhood design, parent safety concerns and child sedentary leisure. However, few studies examined such determinants from children’s perspectives. This study explores environmental and socio-cultural aspects of children’s OP using a qualitative and quantitative …	Moran M.R., Plaut P., Merom D.	Is the grass always greener in suburban neighborhoods? Outdoors play in suburban and inner-city neighborhoods	2017	International Journal of Environmental Research and Public Health	10.3390/ijerph14070759	Children; Mixed methods; Neighborhood; Outdoors play; Physical activity	Scopus
	y	n	n	n		Studies have suggested that visiting and viewing landscaping at hospitals accelerates patient’s recovery from surgery and help staff’s recovery from mental fatigue. To plan and construct such landscapes, we need to unravel landscape features desirable to different groups so that the space can benefit a wide range of hospital users. Using discrete choice modeling, we developed experimental choice …	Chang K.G., Chien H.	The influences of landscape features on visitation of hospital green spaces—a choice experiment approach	2017	International Journal of Environmental Research and Public Health	10.3390/ijerph14070724	Built environment wellbeing; Choice experiment; Healing environment; Hospital; Landscape; Site improvement	Scopus
	n	n	n	n		Introduction: Social conduct is a behaviour aimed at the society and among members of the same species, having influence in the surrounding environment, where ludic actions may play a role. Objective: The paper studies the effect of 15 recreational activities on the social behavior of children and adolescents in the Guamani neighborhood, south of the city of Quito, Republic of Ecuador. Method: Us…	Calero Morales S., Fernández Lorenzo A., Castillo de la Rosa F.L.	Recreation activities to improve social behavior. Study in children and adolescents aged 9-14 [Actividades recreativas para mejorar la conducta social. Estudio en niños y adolescentes entre 9-14 años]	2017	Revista Cubana de Medicina General Integral		Adolescents; Ecuador; Recreational activities; Social behavior	Scopus
	n	n	y	n		Objectives: To assess the association of neighbourhood sanitation coverage with under-five children's diarrhoeal morbidity and to evaluate its exposure–response relationship. Methods: We used the Demographic and Health Surveys (DHS) of 29 developing countries in sub-Saharan Africa and South Asia, conducted between 2010 and 2014. The primary outcome was two-week incidence of diarrhoea in children …	Jung Y.T., Lou W., Cheng Y.-L.	Exposure–response relationship of neighbourhood sanitation and children's diarrhoea	2017	Tropical Medicine and International Health	10.1111/tmi.12886	child health; diarrhoea; environmental health; environmental sanitation; sanitation	Scopus
	y	y	y	y		Background New strategies are required to create supportive physical and social environments for children and promote active free-play. Juega en tu Barrio (JETB; Play in your Neighborhood) was designed and implemented to explore the effectiveness of closing a street in a low-to-middle income neighborhood in order to increase children’s outside play and physical activity. Methods A pretest-posttes…	Cortinez-O’Ryan A., Albagli A., Sadarangani K.P., Aguilar-Farias N.	Reclaiming streets for outdoor play: A process and impact evaluation of “Juega en tu Barrio” (Play in your Neighborhood), an intervention to increase physical activity and opportunities for play	2017	PLoS ONE	10.1371/journal.pone.0180172		Scopus
	y	y	y	y		This study examines aspects of neighbourhood social environments (namely, neighbourhood safety, cohesion and connection) and child-specific built environment attributes in relation to children's independent mobility. The results suggest that children aged 8–13 years with parents who perceive their neighbourhood as more cohesive and more connected, and are located closer to school, engaged in high…	Lin E.-Y., Witten K., Smith M., Carroll P., Asiasiga L., Badland H., Parker K.	Social and built-environment factors related to children's independent mobility: The importance of neighbourhood cohesion and connectedness	2017	Health and Place	10.1016/j.healthplace.2017.05.002	Built environment; Children; Independent mobility; Neighbourhood; Social environment	Scopus
	y	n	n	y		Community gardens play an important role in building urban resilience through improving food security and by increasing neighbourhood social capital. As community gardens become more popular in many countries, understanding what motivates people to join them and stay involved is, therefore, worth researching. This paper explores the key motivations of community gardeners using data from interview…	Pascoe J., Howes M.	A growing movement: Motivations for joining community gardens	2017	WIT Transactions on Ecology and the Environment	10.2495/SDP170331	Community; Community gardens; Motivations; Social capital; Sustainability	Scopus
	n	n	y	n		Despite the growth in empirical research on neighborhood environmental characteristics and their influence on children’s diets, physical activity, and obesity, much remains to be learned, as few have examined the relationship between neighborhood food availability on dietary behavior in children, specifically. This analysis utilized data from a community-based, cross-sectional sample of children …	Dunaway L.F., Carton T., Ma P., Mundorf A.R., Keel K., Theall K.P.	Beyond food access: The impact of parent-, home-, and neighborhood-level factors on children’s diets	2017	International Journal of Environmental Research and Public Health	10.3390/ijerph14060662	Children; Diet; Family; Neighborhood	Scopus
	n	n	y	n		Home environment and family lifestyle practices have an influence on child obesity risk, thereby making it critical to systematically examine these factors. Thus, parents (n = 489) of preschool children completed a cross-sectional online survey which was the baseline data collection conducted, before randomization, in the HomeStyles program. The survey comprehensively assessed these factors using…	Quick V., Martin-Biggers J., Povis G.A., Hongu N., Worobey J., Byrd-Bredbenner C.	A socio-ecological examination of weight-related characteristics of the home environment and lifestyles of households with young children	2017	Nutrients	10.3390/nu9060604	Child; Diet; Home environment; Nutrition; Obesity; Parents; Physical activity; Sleep; Socio-ecological model	Scopus
	n	n	y	n		BACKGROUND: Although previous studies suggest that exposure to traffic-related pollution during childhood increases the risk of childhood overweight or obesity (COWO), the role of early life exposure to fine particulate matter (aerodynamic diameter &lt; 2:5 μm; PM2:5) and its joint effect with the mother’s prepregnancy body mass index (MPBMI) on COWO remain unclear. OBJECTIVES: The present study …	Mao G., Nachman R.M., Sun Q., Zhang X., Koehler K., Chen Z., Hong X., Wang G., Caruso D., Zong G., Pearson C., Ji H., Biswal S., Zuckerman B., Wills-Karp M., Wang X.	Individual and joint effects of early-life ambient PM2.5 exposure and maternal prepregnancy obesity on childhood overweight or obesity	2017	Environmental Health Perspectives	10.1289/EHP261		Scopus
	n	n	y	n		An objective of the Built Environment and Active Play (BEAP) Study was to examine whether home built environment, bedroom electronic presence, parental rules and demographics predicted children's sedentary behavior (SB). In 2014, BEAP Study questionnaires were mailed to 2000 parents of children (7–12 years) within the Washington DC area. SB-Duration (hours/day) and SB-Frequency (days/week) were a…	Roberts J.D., Rodkey L., Ray R., Knight B., Saelens B.E.	Electronic media time and sedentary behaviors in children: Findings from the Built Environment and Active Play Study in the Washington DC area	2017	Preventive Medicine Reports	10.1016/j.pmedr.2017.02.021	BEAP Study; Built environment; Electronic use; Parental rules; Sedentary behavior	Scopus
	n	n	y	n		Background: Lower respiratory illnesses (LRIs) and asthma are common diseases in children <5 years of age. Few studies have investigated the relationships between multiple, home-based social and environmental risk factors and asthma and LRIs in children. Of those that have, none have focused exclusively on children <5 years of age, who are more physiologically vulnerable and spend more time at ho…	Lothrop N., Hussaini K., Billheimer D., Beamer P.	Community-level characteristics and environmental factors of child respiratory illnesses in Southern Arizona	2017	BMC Public Health	10.1186/s12889-017-4424-3	Air pollution; Asthma; Children; Housing; Lower respiratory illness; Neighborhood; Socio-economic status	Scopus
	y	n	y	y		Background: A limited amount of research has examined the effect of changing public open spaces on active living. This paper will present the study protocol of a community-based intervention study co-designed in an interdisciplinary collaboration with community members to develop urban installations highly tailored to promote active living among children (10-13-years-old) and seniors (>60-years-o…	Pawlowski C.S., Winge L., Carroll S., Schmidt T., Wagner A.M., Nørtoft K.P.J., Lamm B., Kural R., Schipperijn J., Troelsen J.	Move the Neighbourhood: Study design of a community-based participatory public open space intervention in a Danish deprived neighbourhood to promote active living	2017	BMC Public Health	10.1186/s12889-017-4423-4	Accelerometer; Active living; Children; Co-design; Deprived neighbourhood; GPS; Seniors; SOPARC; Study design; Urban installations	Scopus
	y	n	y	y		Pre-school children, as well as children from lower grades in primary school, who although rarely, completely independently participate in traffic, represent a vulnerable population from the standpoint of traffic safety. The greatest number of children were injured or killed in road traffic crashes on their way from home to kindergarten or school. Mostly due to lack of experience, children's beha…	Trifunović A., Pešić D., Čičević S., Antić B.	The importance of spatial orientation and knowledge of traffic signs for children's traffic safety	2017	Accident Analysis and Prevention	10.1016/j.aap.2017.02.019	Children traffic safety; Color perception; Non-verbal tests; Spatial orientation; Traffic signs	Scopus
	n	n	y	n		Maltreatment continues to be a leading cause of death for young children. Researchers are beginning to uncover which neighborhood attributes may be associated with maltreatment outcomes. However, few studies have been able to explore these influences while controlling for individual family attributes, and none have been able to parse out the most severe outcomes—injuries resulting in hospitalizat…	Thurston H., Freisthler B., Bell J., Tancredi D., Romano P.S., Miyamoto S., Joseph J.G.	Environmental and individual attributes associated with child maltreatment resulting in hospitalization or death	2017	Child Abuse and Neglect	10.1016/j.chiabu.2017.02.024	Child maltreatment death; Conditional logistic regression; Environmental; GIS; Housing density	Scopus
	n	n	y	n		Objectives Children with special health care needs (SHCN) have or are at elevated risk for chronic physical, developmental, behavioral or emotional conditions and therefore require specialized health care services. This study examines the relationship between residential neighborhood amenities and physical activity among U.S. children with SHCN. Methods A nationally representative sample of 113,7…	An R., Yang Y., Li K.	Residential Neighborhood Amenities and Physical Activity Among U.S. Children with Special Health Care Needs	2017	Maternal and Child Health Journal	10.1007/s10995-016-2198-3	Amenity; Children; Neighborhood; Physical activity; Special health care needs	Scopus
	n	n	n	n		Purpose To examine whether parental pesticide exposure contributes to the development of sporadic retinoblastoma. Design Case-control study. Methods Data were collected by a large multicenter study of sporadic retinoblastoma in which parents of 99 unilateral and 56 bilateral age-matched case-control pairs were interviewed by telephone. Retrospective exposure information was collected on the type,…	Omidakhsh N., Ganguly A., Bunin G.R., von Ehrenstein O.S., Ritz B., Heck J.E.	Residential Pesticide Exposures in Pregnancy and the Risk of Sporadic Retinoblastoma: A Report From the Children's Oncology Group	2017	American Journal of Ophthalmology	10.1016/j.ajo.2017.01.016		Scopus
待定	y	y	y	y		Child health and development benefit from physical activity. This analysis describes the residential play environment for children aged 2–4 years in farmworker families, their parent-reported levels of play and media time, and the association of residential environment with play and media time. Mothers with a child aged 2–4 years in farmworker families (n = 248) completed interviews over 2 years.…	Arcury T.A., Suerken C.K., Ip E.H., Moore J.B., Quandt S.A.	Residential Environment for Outdoor Play Among Children in Latino Farmworker Families	2017	Journal of Immigrant and Minority Health	10.1007/s10903-016-0473-4	Child health; Immigrant health; Minority health; Physical activity; Vulnerable populations	Scopus
	n	n	y	n		Concerns regarding lead (Pb) poisoning in French Guiana first arose in 2011 following the discovery of excessively high levels of the metal amongst children in a small neighborhood without any apparent source of Pb. Since 2012, blood lead level (BLL) measurement has been proposed for all pregnant women in western French Guiana. The aim of this study was to determine BLL in pregnant women in this …	Rimbaud D., Restrepo M., Louison A., Boukhari R., Ardillon V., Carles G., Lambert V., Jolivet A.	Blood lead levels and risk factors for lead exposure among pregnant women in western French Guiana: the role of manioc consumption	2017	Journal of Toxicology and Environmental Health - Part A: Current Issues	10.1080/15287394.2017.1331490		Scopus
	n	y	y	n		Introduction: The objective was to report epidemiological and lesional features among children practicing wrestling as a game in Dakar, Senegal. Methods: It was a retrospective study including all patients under 16, victims of wrestling game injuries. We studied epidemiological and lesional aspects in children: frequency of wrestling game injuries among all games, age, sex, geographic origin, pla…	Ngom G., Mohamed A.S., Mbaye P.A., Fall M., Ndour O., Faye A.L., El-Hasnaoui Z.	Wrestling game injuries among children in dakar: A report on 172 cases	2017	Pan African Medical Journal	10.11604/pamj.2017.26.150.7961	Children; Dakar; Fall; Fracture; Injuries; Wrestling game	Scopus
	n	n	y	n		Government initiatives have tried to ensure uniform computer access for young people; however a divide related to socioeconomic status (SES) may still exist in the nature of information technology (IT) use. This study aimed to investigate this relationship in 1,351 Western Australian children between 6 and 17 years of age. All participants had computer access at school and 98.9% at home. Neighbou…	Harris C., Straker L., Pollock C.	A socioeconomic related 'digital divide' exists in how, not if, young people use computers	2017	PLoS ONE	10.1371/journal.pone.0175011		Scopus
	n	n	n	n		Urban soils may be contaminated with heavy metals due to historical and current use of fertilizers, pesticides, wood preservatives, and construction materials. To examine the amount of trace metals from natural and anthropogenic sources, we focused on a middle-to-upper income, residential area in Spokane, Washington which was developed in the late 1800s but has not experienced heavy industrial ac…	Nezat C.A., Hatch S.A., Uecker T.	Heavy metal content in urban residential and park soils: A case study in Spokane, Washington, USA	2017	Applied Geochemistry	10.1016/j.apgeochem.2016.12.018	Arsenic; Lead; Metals; Paint; Soil; Urban	Scopus
是否涉及到环境，需待定	y	y	y	y		Introduction Parks are an important component of the neighborhood environment, and their presence is believed to support higher levels of physical activity among residents. The present study examined park use frequency among a sample of 534 low-income parents of preschool aged children. Associations with child and parent physical activity, neighborhood characteristics and physical characteristics…	French S.A., Sherwood N.E., Mitchell N.R., Fan Y.	Park use is associated with less sedentary time among low-income parents and their preschool child: The NET-Works study	2017	Preventive Medicine Reports	10.1016/j.pmedr.2016.11.003		Scopus
	n	n	n	n		Background While it appears that social capital has a positive effect on mental health, most studies have been cross-sectional in nature and/or employ weak measures of social capital or mental health. Even less attention has been paid to vulnerable populations, such as lowincome women with children. Thus, our objective was to explore how different dimensions of social capital impact depression in…	Wilmot N.A., Dauner K.N.	Examination of the influence of social capital on depression in fragile families	2017	Journal of Epidemiology and Community Health	10.1136/jech-2016-207544		Scopus
	n	y	y	n		Physical fitness in children has many beneficial effects, including the maintenance of a healthy weight. The built environment may influence youths’ physical fitness by encouraging physical activity. This paper assessed whether higher density of parks, playgrounds, and sports facilities around a school is related to improvements in fitness in middle school boys and girls. Fitness scores and other…	Bezold C.P., Stark J.H., Rundle A., Konty K., Day S.E., Quinn J., Neckerman K., Roux A.V.D.	Relationship between Recreational Resources in the School Neighborhood and Changes in Fitness in New York City Public School Students	2017	Journal of Urban Health	10.1007/s11524-016-0114-1	Built environment; Fitness; School health	Scopus
	y	n	y	n		Features of the physical environment have an impact on the human behaviour. Thus, planners and policymakers around the world should aim at providing environments that are perceived as being of good quality, in which the residents enjoy spending time and moving around in. It is widely acknowledged that urban environmental quality associates with well-being, but there is currently very little resea…	Laatikainen T.E., Broberg A., Kyttä M.	The physical environment of positive places: Exploring differences between age groups	2017	Preventive Medicine	10.1016/j.ypmed.2016.11.015	Built environment; Life course; Motivating environments; Perceptions; Physical environment; Place mapping; Positive place; PPGIS	Scopus
	n	n	y	n		Parks and park features are important for promoting physical activity and healthy weight, especially for low-income and racial/ethnic minority youth who have disproportionately high obesity rates. This study 1) examined associations between neighborhood park and playground availability and youth obesity, and 2) assessed whether these associations were moderated by youth race/ethnicity and socioec…	Morgan Hughey S., Kaczynski A.T., Child S., Moore J.B., Porter D., Hibbert J.	Green and lean: Is neighborhood park and playground availability associated with youth obesity? Variations by gender, socioeconomic status, and race/ethnicity	2017	Preventive Medicine	10.1016/j.ypmed.2016.11.024	Built environment; Health disparities; Neighborhood parks; Pediatric obesity	Scopus
	n	n	y	n		Studies that focus on children's safety and well-being often focus on neighborhoods as the unit of analysis, as it is within these geographic confines that children spend much of their time. Such studies have shown that neighborhoods directly and indirectly influence children's safety and well-being. Much of this research has focused on census data and/or caregivers' perceptions of neighborhood c…	Katz C., McLeigh J.D., El Szwek B.	Preschoolers' perceptions of neighborhood environment, safety, and help-seeking	2017	Children and Youth Services Review	10.1016/j.childyouth.2016.12.016	Children's voices; Help-seeking; Neighborhoods; Safety; Young children	Scopus
	n	n	n	n		Background: Nigeria is among countries with high Under-Five Mortality (U5M) rates worldwide. Both maternal and childhood factors have been linked to U5M in the country. However, despite the growing global recognition of the association between housing and quality of life, the role of housing materials as predictors of U5M remain largely unexplored in Nigeria. This study, therefore, investigated t…	Adebowale S.A., Morakinyo O.M., Ana G.R.	Housing materials as predictors of under-five mortality in Nigeria: Evidence from 2013 demographic and health survey	2017	BMC Pediatrics	10.1186/s12887-016-0742-3	Housing materials; Nigeria; Under-five mortality	Scopus
	n	n	y	y		Child and Youth Care Centres (CYCCs) play a significant role in accommodating children who are victims of abuse, neglect and abandonment in South Africa. However, professionals in these settings face a dilemma, as they often cannot accommodate every child’s cultural needs. This study explored the cultural challenges experienced by adolescent boys living at a CYCC in Ekurhuleni. Findings indicate …	Malatji H., Dube N.	Experiences and challenges related to residential care and the expression of cultural identity of adolescent boys at a Child and Youth Care Centre (cycc) in Johannesburg	2017	Social Work (South Africa)	10.15270/53-1-549		Scopus
	n	y	y	n		Background. Little research has comprehensively explored how park features, quality indicators, and neighborhood environments are associated with observed park usage and physical activity (PA). This case study examined whether weekday park usage and PA differ by neighborhood type, across numerous categories of park features, and according to park feature condition and cleanliness. Methods. Direct…	Hamilton K., Kaczynski A.T., Fair M.L., Lévesque L.	Examining the relationship between park neighborhoods, features, cleanliness, and condition with observed weekday park usage and physical activity: A case study	2017	Journal of Environmental and Public Health	10.1155/2017/7582402		Scopus
	n	n	y	y		Research Framework: Recreational activities and cultural preferences and practices are a way of affirming and situating oneself in the social world, as much by one’s class or age as by one’s gender or place of residence. To say it in other words: “if you play soccer, like video games and listen to rap music… then you are a working class boy”. Objectives: This articles seeks to question this appar…	Perronnet C.	Among the boys: recreational activities and the construction of gender identity through socializing with masculine family members and friends, in the working classes [Du côté des garçons: loisirs et construction de l’identité genrée à travers les sociabilités familiales et amicales masculines en milieux populaires]	2017	Enfances, Familles, Generations		Childhood; Family; Gender; Gender identity; Intersectionnality; Recreational activities; Social inequality; Socialization	Scopus
	n	n	n	n		Entanglement is a key concept in contemporary anthropology and science and technology studies. By tracing the contingent and uncertain relations that endow objects with seemingly stable boundaries, entanglement allows us to see how such boundaries restrict our ability to know the world better. This article examines the concept of entanglement in the context of contemporary life in a working-class…	Roberts E.F.S.	What gets inside: Violent entanglements and toxic boundaries in Mexico City	2017	Cultural Anthropology	10.14506/ca32.4.07		Scopus
	n	n	y	n		Lack of adequate sanitation results in fecal contamination of the environment and poses a risk of disease transmission via multiple exposure pathways. To better understand how eight different sources contribute to overall exposure to fecal contamination, we quantified exposure through multiple pathways for children under 5 years old in four high-density, low-income, urban neighborhoods in Accra, …	Wang Y., Moe C.L., Null C., Raj S.J., Baker K.K., Robb K.A., Yakubu H., Ampofo J.A., Wellington N., Freeman M.C., Armah G., Reese H.E., Peprah D., Teunis P.F.M.	Multipathway quantitative assessment of exposure to fecal contamination for young children in low-income urban environments in Accra, Ghana: the Sanipath analytical approach	2017	American Journal of Tropical Medicine and Hygiene	10.4269/ajtmh.16-0408		Scopus
	n	n	y	y		Scholars suggest that children’s built and social environments play key roles in their physical activity (PA) levels and subsequent propensity toward obesity. This study examines the associations between neighborhood constructs and the race and income disparities in PA and health among children ages 10–17 years in the United States. Using the 2011–2012 National Survey of Children’s Health and a s…	Uzochukwu K.	The associations between neighborhood constructs, physical activity, and childhood obesity: Understanding race and income disparities	2017	Journal of Urban Affairs	10.1080/07352166.2016.1251196		Scopus
	n	n	n	n		Purpose-The purpose of this paper is to assess the early findings of research which aims to hear the voice of looked after children about their pathways into offending and subsequent entry into the youth justice system, and the implications that this may have for policy and practice. Design/methodology/approach-One-to-one semi-structured interviews have taken place with 19 looked after children, …	Day A.-M.	Hearing the voice of looked after children: Challenging current assumptions and knowledge about pathways into offending	2017	Safer Communities	10.1108/SC-01-2017-0003	Children in care; Crime; Criminalization; Labelling; Looked after children; Power; Youth justice; Youth offending	Scopus
	n	n	y	y		Playgrounds form one of the types of public spaces with the widest possible access and thus imply opportunities for interethnic contact. This contact, in turn, can contribute to migrant social integration - meaning a weakening of migrant-non-migrant stereotypes and a formation of new social ties between these two 'groups' - or, on the contrary, lead to conflicts and strengthen negative attitudes.…	Rocheva A., Varshaver E., Ivanova N.	Playgrounds as migrant integration spaces	2017	Voprosy Obrazovaniya / Educational Studies Moscow	10.17323/1814-9545-2017-2-167-184	Contact theory; Interethnic contact; Migrant integration; Moscow; Playgrounds; Public spaces	Scopus
	n	n	n	n		Urban sanitation necessitates management of fecal sludge inside and outside the household. This study examined associations between household sanitation, fecal contamination, and enteric infection in two low-income neighborhoods in Vellore, India. Surveys and spatial analysis assessed the presence and clustering of toilets and fecal sludge management (FSM) practices in 200 households. Fecal conta…	Berendes D., Kirby A., Clennon J.A., Raj S., Yakubu H., Leon J., Robb K., Kartikeyan A., Hemavathy P., Gunasekaran A., Ghale B., Kumar J.S., Mohan V.R., Kang G., Moe C.	The influence of household- and community-level sanitation and fecal sludge management on urban fecal contamination in households and drains and enteric infection in children	2017	American Journal of Tropical Medicine and Hygiene	10.4269/ajtmh.16-0170		Scopus
					重复	Child and Youth Care Centres (CYCCs) play a significant role in accommodating children who are victims of abuse, neglect and abandonment in South Africa. However, professionals in these settings face a dilemma, as they often cannot accommodate every child's cultural needs. This study explored the cultural challenges experienced by adolescent boys living at a CYCC in Ekurhuleni. Findings indicate …	Malatji H., Dube N.	Experiences and challenges related to residential care and the expression of cultural identity of adolescent boys at a child and youth care centre (CYCC) in Johannesburg	2017	Social Work (South Africa)	10.15270/52-2-549		Scopus
	n	n	n	n		Pyrethroids are insecticides frequently used in agriculture and in the home; exposure occurs through dietary and non-dietary pathways, including indoor and outdoor environmental contamination. Our objective was to study the potential determinants of pyrethroid metabolite concentrations measured in children's urine samples and in the dust of their homes. Specifically, we measured urinary metabolit…	Glorennec P., Serrano T., Fravallo M., Warembourg C., Monfort C., Cordier S., Viel J.-F., Le Gléau F., Le Bot B., Chevrier C.	Determinants of children's exposure to pyrethroid insecticides in western France	2017	Environment International	10.1016/j.envint.2017.04.007	Biomarker; Dietary exposure; Dust; Environmental exposure; Pesticide	Scopus
	n	n	n	n		Do people perceive the built environment the same as we objectively measure it? If not, what are the relative roles of the objective versus the perceived environment on bicycling behavior? This study, based on data from Portland, Oregon, explored the match or mismatch between the objective and perceived bicycling environment and how it affects people’s bicycling behavior. The descriptive analysis…	Ma L., Dill J.	Do people’s perceptions of neighborhood bikeability match “reality”?	2017	Journal of Transport and Land Use	10.5198/jtlu.2016.796	Bicycling; Built environment; Objective measure; Perceived measure	Scopus
	y	y	y	y		This study examined cross-sectional and prospective associations between clusters of neighbourhood attributes (typologies) and non-school moderate-to-vigorous physical activity, sedentary time (objectively measured) and proxy-reported television viewing among children aged 5–6 and 10–12 years. Four distinct clusters were identified from seven objectively-measured neighbourhood attributes (land us…	Timperio A., Crawford D., Ball K., Salmon J.	Typologies of neighbourhood environments and children's physical activity, sedentary time and television viewing	2017	Health and Place	10.1016/j.healthplace.2016.10.004	Built environment; Neighbourhood; Physical activity; sedentary; television viewing	Scopus
	n	n	n	n		Although previous studies showed that children are widely exposed to phthalates, the sources of phthalate exposure for school-aged children in China are not well understood. This study aimed to assess phthalate metabolite levels and explore the factors influencing exposure in children. We collected demographic data and biological samples from 336 children aged 6–12 years. We calculated urinary co…	Wu W., Zhou F., Wang Y., Ning Y., Yang J.-Y., Zhou Y.-K.	Phthalate levels and related factors in children aged 6–12 years	2017	Environmental Pollution	10.1016/j.envpol.2016.11.049	Phthalate metabolite; Relate factors; School-aged children	Scopus
	n	n	y	y		Background: The current study examined relationships between the neighborhood social environment (parental perceived collective efficacy (PCE)), constrained behaviors (e.g., avoidance or defensive behaviors) and adolescent offspring neighborhood physical activity in lowversus high-incivility neighborhoods. Methods: Adolescents (n = 71; 11-18 years (14.2, SD ± 1.6); male = 37 (52%); non-white = 24…	Kepper M., Broyles S., Scribner R., Tseng T.-S., Zabaleta J., Griffiths L., Sothern M.	Parental perceptions of the social environment are inversely related to constraint of adolescents’ neighborhood physical activity	2016	International Journal of Environmental Research and Public Health	10.3390/ijerph13121266	Adolescent outdoor play; Parenting behaviors; Physical activity; Social environment	Scopus
	n	n	y	n		Background: Numerous studies have focused on the role of environments in promoting physical activity, but few studies have examined the specific locations where children are active and whether being active in these locations is associated with physical activity levels over time. Methods: Self-reported locations of where physical activity occurred and physical activity measured via accelerometry w…	Colabianchi N., Griffin J.L., McIver K.L., Dowda M., Pate R.R.	Where are children active and does it matter for physical activity? a latent transition analysis	2016	Journal of Physical Activity and Health	10.1123/jpah.2015-0607	Accelerometry; Environment; Exercise; Pediatrics; Physical activity	Scopus
	y	y	y	y		Outdoor spaces within the neighbourhood areas are vital in supporting social systems of children. Children become comfortable, familiar and appreciative of their surrounding environment within their home proximity. The absence of conducive spaces, especially nearby nature for children to play and socialise can impact their psychological attitudes as they become adults. Playing in nearby natural s…	Mansor M., Mansor M., Man S.I.C., Ismail I.A.	Urban children’s familiarity and feeling towards nearby nature	2016	Advanced Science Letters	10.1166/asl.2016.8101	Children; Familiarity; Feeling; Nearby Nature; Urban Neighborhood	Scopus
	n	n	n	n		We explore the impact of “game changers” on the dynamics of innovation over time in three problem domains, that of wilderness protection, women’s rights, and assimilation of indigenous children in Canada. Taking a specifically historical and crossscale approach, we look at one social innovation in each problem domain. We explore the origins and history of the development of the National Parks in …	Westley F.R., McGowan K.A., Antadze N., Blacklock J., Tjornbo O.	How game changers catalyzed, disrupted, and incentivized social innovation: Three historical cases of nature conservation, assimilation, and women’s rights	2016	Ecology and Society	10.5751/ES-08811-210413	Complexity; Game changers; Innovation; North America; Social innovation; Transformative change	Scopus
	n	n	y	y		Introduction The early years are a critical period in a child's health and development, yet most preschool children fail to meet physical activity guidelines. Outside of the home and neighbourhood, children spend a large proportion of time within early childhood education and care (ECEC) services such as long day care. Research is required to determine how the design of day care outdoor (and indo…	Christian H., Maitland C., Enkel S., Trapp G., Trost S.G., Schipperijn J., Boruff B., Lester L., Rosenberg M., Zubrick S.R.	Influence of the day care, home and neighbourhood environment on young children's physical activity and health: protocol for the PLAYCE observational study	2016	BMJ Open	10.1136/bmjopen-2016-014058	Environment; Physical activity; PUBLIC HEALTH; Young children	Scopus
	n	n	y	y		Objective Social relationships can impact youths' eating and physical activity behaviours; however, the best strategies for intervening in the social environment are unknown. The objectives of the present study were to provide in-depth information on the social roles that youths' parents and friends play related to eating and physical activity behaviours and to explore the impact of other social …	Anderson Steeves E.T., Johnson K.A., Pollard S.L., Jones-Smith J., Pollack K., Lindstrom Johnson S., Hopkins L., Gittelsohn J.	Social influences on eating and physical activity behaviours of urban, minority youths	2016	Public Health Nutrition	10.1017/S1368980016001701	African American; Eating; Friends; Keywords Adolescent; Minority; Obesity; Parents; Physical activity; Social influence; Social relationships; Urban	Scopus
待定	y	y	y	y		Background: Perception of undesirable features may inhibit built environment use for physical activity among underserved families with children at risk for obesity. Methods: To examine the association of perceived availability, condition, and safety of the built environment with its self-reported use for physical activity, we conducted a cross-sectional analysis on baseline data from a randomized…	Heerman W.J., Mitchell S.J., Thompson J., Martin N.C., Sommer E.C., Van Bakergem M., Taylor J.L., Buchowski M.S., Barkin S.L.	Parental perception of built environment characteristics and built environment use among Latino families: a cross-sectional study	2016	BMC Public Health	10.1186/s12889-016-3854-7	Built environment; Obesity; Physical activity	Scopus
	y	n	y	y		Children show stronger cooperative behavior in experimental settings as they get older, but little is known about how the environment of a child shapes this development. In adults, prosocial behavior toward strangers is markedly decreased in low socio-economic status (SES) neighborhoods, suggesting that environmental harshness has a negative impact on some prosocial behaviors. Similar results hav…	Safra L., Tecu T., Lambert S., Sheskin M., Baumard N., Chevallier C.	Neighborhood deprivation negatively impacts children's prosocial behavior	2016	Frontiers in Psychology	10.3389/fpsyg.2016.01760	Behavioral ecology; Deprivation; Dictator game; Poverty; Prosociality; SES	Scopus
	n	n	y	y		Background: Promoting physical activity (PA) in low-and middle-income countries is an important public health topic as well as a challenge for practice. This study aimed to assess the effect of a school-based intervention on different PA-related variables among students. Methods: This cluster-randomized-controlled trial included 548 students in the intervention group and 537 in the control group …	Filho V.C.B., Da Silva K.S., Mota J., Beck C., Da Silva Lopes A.	A physical activity intervention for Brazilian Students from low human development index areas: A cluster-randomized controlled trial	2016	Journal of Physical Activity and Health	10.1123/jpah.2016-0113	Clinical trial; Health behavior; Motor activity; School health; Social vulnerability; Socioecological Theory	Scopus
大论文可以引用，即应到底当以什么样的方式去设计让儿童接触大自然	y	n	y	y		Today's children have less direct contact with nature than ever before, resulting in an “extinction of experience”. Research has suggested that such loss of daily interactions decreases people's appreciation of the natural world, but this remains quantitatively unexplored. We conducted a questionnaire survey of undergraduate university students in Tokyo, Japan, and determined the effects of frequ…	Soga M., Gaston K.J., Koyanagi T.F., Kurisu K., Hanaki K.	Urban residents' perceptions of neighbourhood nature: Does the extinction of experience matter?	2016	Biological Conservation	10.1016/j.biocon.2016.09.020	Conservation psychology; Ecosystem services; Human health; Nature experiences; Psychological wellbeing; Urban ecology	Scopus
	y	y	y	y		In 2013, San Francisco was one of eight sites funded by Partnership for a Healthier America to implement Play Streets, a smaller-scale Open Streets-type initiative, aimed at increasing physical activity (PA) among children and youth by closing neighborhood streets for recreational activities. This paper evaluates the pilot Play Streets events held in summer of 2013 in San Francisco with a focus o…	Zieff S.G., Chaudhuri A., Musselman E.	Creating neighborhood recreational space for youth and children in the urban environment: Play(ing in the) Streets in San Francisco	2016	Children and Youth Services Review	10.1016/j.childyouth.2016.09.014	Built environment; Children and youth; Community health; Open Streets; Physical activity; Play Streets	Scopus
娱乐设施可以促进儿童的身体运动	n	y	y	y		Background: We examined the relationship between parents' perception of neighborhood safety and children's physical activity and use of recreation facilities in a US nationally representative sample of fifth grade children. Methods: We used data from the Early Childhood Longitudinal Study Kindergarten cohort, fifth grade sample (N = 9827). Multivariate logistic and linear regression models were u…	Galaviz K.I., Zytnick D., Kegler M.C., Cunningham S.A.	Parental perception of neighborhood safety and children's physical activity	2016	Journal of Physical Activity and Health	10.1123/jpah.2015-0557	Exercise; Recreational facilities; Safety	Scopus
	n	n	y	n		The study determined the association between body mass index (BMI) z score and fruit and vegetable intake, frequency and ratio of fast food outlets and grocery stores in concentric areas around the child's residence, outdoor play and total crime index. Data from 78 Louisiana pre-school children were analyzed using Pearson's correlation and multiple regression analysis. Parental-reported fruit int…	Kepper M., Tseng T.-S., Volaufova J., Scribner R., Nuss H., Sothern M.	Pre-school obesity is inversely associated with vegetable intake, grocery stores and outdoor play	2016	Pediatric Obesity	10.1111/ijpo.12058	Behaviour; environment; obesity; pre-school	Scopus
	n	n	n	n		SYNOPSIS: Objective. Caregivers play an important role in child development; in addition to instilling their norms and values in their children through socialization, caregivers modify their parenting practices in response to children’s characteristics. Previous studies have documented child genetic effects on parenting behaviors, but multivariate behavioral genetic examinations of parenting are …	Cheung A.K., Harden K.P., Tucker-Drob E.M.	Multivariate Behavioral Genetic Analysis of Parenting in Early Childhood	2016	Parenting	10.1080/15295192.2016.1184926		Scopus
	n	n	y	y		Background: Structural factors of neighbourhood environments in which children live have attracted increasing attention in epidemiological research. This study investigated whether neighbourhood socioeconomic position (SEP), public playground and park space, and perceived environmental exposures were independently associated with overweight in preschool aged children while simultaneously consider…	Schüle S.A., Fromme H., Bolte G.	Built and socioeconomic neighbourhood environments and overweight in preschool aged children. A multilevel study to disentangle individual and contextual relationships	2016	Environmental Research	10.1016/j.envres.2016.06.024	Built environment; Children; Contextual factors; Multilevel study; Neighbourhood; Overweight; Socioeconomic position	Scopus
	y	y	y	y		Children's time and freedom for independent neighbourhood activity is severely declining, which may be adversely impacting their healthy development. This study integrates GPS activity monitoring and environmental analysis in a geographic information system with activity diaries, annotated maps, surveys, and map-enhanced interviews to conduct a deep pattern analysis of children's habitual neighbo…	Loebach J., Gilliland J.	Neighbourhood play on the endangered list: examining patterns in children's local activity and mobility using GPS monitoring and qualitative GIS	2016	Children's Geographies	10.1080/14733285.2016.1140126	affordances; children; GPS monitoring; independent mobility; neighbourhood play; qualitative GIS	Scopus
	n	n	n	n		The current study, relying on humanistic and ecological psychology, aimed at evaluation of environmental satisfaction factors between undergraduate boy students residing in the dormitories of Guilan University and the predictive power these factors for using in architectural designing of further developments of the dormitories in this environment. The research method is correlation and the main d…	Chafjiri R.P.	A study on the satisfaction factors in designing the students house: A case study of boys dormitory campus of the University of Guilan	2016	IIOAB Journal		Dormitory; Environment; Need; Satisfaction; Students	Scopus
分析儿童在户外游戏的季节性	n	y	y	y		Studies of seasonal barriers for outdoor activities seldom view families’ play practices as grounded in the everyday experience of the natural elements. This paper brings 20 families’ mundane outdoor play experiences in Auckland's temperate climate to the fore. Through drawings and interviews, families residing in both suburban detached houses and central city apartments revealed locally constitu…	Ergler C.R., Kearns R., Witten K.	Exploring children's seasonal play to promote active lifestyles in Auckland, New Zealand	2016	Health and Place	10.1016/j.healthplace.2016.07.001	Obesity; Play; Qualitative; Seasonality; Urban intensification	Scopus
	n	n	y	y		This paper presents the findings of a study that used an innovative mixed methods community based participatory research approach that included participatory photo mapping, which combines photography, youth-led neighborhood tours, and advocacy (n = 10); in-depth interviews with youth (n = 21); and spatial analysis of neighborhood factors using Geographic Information Systems (GIS). The focus is on…	Teixeira S.	Beyond Broken Windows: Youth Perspectives on Housing Abandonment and its Impact on Individual and Community Well-Being	2016	Child Indicators Research	10.1007/s12187-015-9327-1	Built environment; Community based participatory research; Housing; Neighborhood effects; Youth development	Scopus
	n	n	y	y		In 2011, an artificial hook-shaped peninsula of 128 ha beach area was created along the Dutch coast, containing thousands of iron ore lumps, which include arsenic from natural origin. Elemental arsenic and inorganic arsenic induce a range of toxicological effects and has been classified as proven human carcinogens. The combination of easy access to the beach and the presence of arsenic raised con…	Swartjes F.A., Janssen P.J.C.M.	Assessment of health risks due to arsenic from iron ore lumps in a beach setting	2016	Science of the Total Environment	10.1016/j.scitotenv.2016.04.100	Arsenic; Beach setting; Human health risks; Iron ore lumps	Scopus
空间的综合性分析，过于宽泛，但可以借鉴方法	n	y	y	y		The creation of satisfying urban environments calls for the planners, designers and policy makers to understand the structures that cause residents to feel satisfied with their environments. The paper focuses on qualitative aspects of the childrens play spaces in the urban neighborhoods of Nagpur which were analysed with the background of their daily activity schedule survey, their assement of th…	Bhonsle K.D., Adane V.S.	Assessing the play provisions for children in urban neighborhoods of India: Case study Nagpur, Maharashtra	2016	Buildings	10.3390/buildings6030031	Child friendly environments; Resdients perception; Social ties; Urban residential environment	Scopus
	n	n	y	y		Background: In order to develop effective physical activity interventions and to address the burden of obesity in Hispanic children, qualitative studies are needed to build descriptive theory and expand the state of the science. The purpose of this study is to describe physical activity perceptions, context, facilitators, and barriers from the perspective of Hispanic immigrant-origin children. Me…	Ross S.E.T., Francis L.A.	Physical activity perceptions, context, barriers, and facilitators from a Hispanic child's perspective	2016	International Journal of Qualitative Studies on Health and Well-being	10.3402/qhw.v11.31949	Child; Exercise; Immigrant; Qualitative research; Sedentary behavior	Scopus
	n	y	y	y		Purpose: This study tested associations of organized sports participation and unstructured active play with overall moderate and vigorous physical activity (MVPA) in low-income children and examined factors associated with participation frequency. Method: Research staff visited 88 low-income Chicago households with children ages 6-13 years. MVPA was assessed through 7-day accelerometry. Researche…	Appelhans B.M., Li H.	Organized sports and unstructured active play as physical activity sources in children from low-income Chicago households	2016	Pediatric Exercise Science	10.1123/pes.2015-0249	Child health; Neighborhood; Socioeconomic factors; Urban health	Scopus
	n	n	y	n		Objective: Juvenile idiopathic arthritis (JIA) is a heterogeneous group of disorders characterized by chronic arthritis in children with unknown etiology. Although research evaluating environmental or early-life exposures in JIA is scarce, there are data to suggest that infections, smoking exposure, and lack of breastfeeding play a role. This case–control study investigated the association of sel…	Shenoi S., Shaffer M.L., Wallace C.A.	Environmental Risk Factors and Early-Life Exposures in Juvenile Idiopathic Arthritis: A Case–Control Study	2016	Arthritis Care and Research	10.1002/acr.22806		Scopus
	n	n	n	n		Australia has a long history of metal mining and smelting. Extraction and processing have resulted in elevated levels of toxic metals surrounding mining operations, which have adverse health effects, particularly to children. Resource companies, government agencies and employees often construct ‘myths’ to down play potential exposure risks and responsibility arising from operating emissions. Typi…	Kristensen L.J., Taylor M.P.	Unravelling a ‘miner’s myth’ that environmental contamination in mining towns is naturally occurring	2016	Environmental Geochemistry and Health	10.1007/s10653-016-9804-6	Australia; Broken Hill; Emissions; Lead; Mining	Scopus
	n	n	n	n		Purpose Understanding the WHY, WHAT, and HOW of place-based work in maternal and child health (MCH) is critical to examining the components of the environment that shape health opportunity through the relationship between life expectancy and neighborhood residence. Description On September 18, 2014, during the CityMatCH Leadership and MCH Epidemiology Conference, Dr. Anthony Iton provided the Key…	Iton A., Shrimali B.P.	Power, Politics, and Health: A New Public Health Practice Targeting the Root Causes of Health Equity	2016	Maternal and Child Health Journal	10.1007/s10995-016-1980-6	Collective impact; Community organizing; Health equity; Life course; Life expectancy; Place-based interventions; Policy and systems change; Power; Social determinants of health	Scopus
	y	n	y	y		Background: This study aimed to evaluate parental perception of neighbourhood environments and safety in association with children's physical activity among primary school children in Klang, Selangor, Malaysia. Methods: A total of 250 children (9–12 years of age) and their parents participated in this cross-sectional study. Physical Activity Questionnaire for Older Children and Neighbourhood Envi…	Tung S.E.H., Ng X.H., Chin Y.S., Mohd Taib M.N.	Associations between parents' perception of neighbourhood environments and safety with physical activity of primary school children in Klang, Selangor, Malaysia	2016	Child: Care, Health and Development	10.1111/cch.12355	children; constrained behaviour; neighbourhood environment; parents' perception; physical activity; safety	Scopus
	n	n	n	n		Food insecurity among children and their families negatively affects children's health and well-being. While the link between household resources and food insecurity is well-established, family income alone does not explain food insecurity; neighborhood disadvantage, shown to affect other areas of children's development, may also play a role in food insecurity. This study examines associations be…	Morrissey T.W., Oellerich D., Meade E., Simms J., Stock A.	Neighborhood poverty and children's food insecurity	2016	Children and Youth Services Review	10.1016/j.childyouth.2016.05.006	Children; Food insecurity; Neighborhood poverty	Scopus
	y	n	y	y		Background: Urban design may affect children’s habitual physical activity by influencing active commuting and neighborhood play. Purpose: Our objective was to examine associations between neighborhood built-environment features near children’s homes and objectively measured physical activity. Methods: We used geographical information system (GIS) protocols to select 2016 households from 48 low- a…	McGrath L.J., Hinckson E.A., Hopkins W.G., Mavoa S., Witten K., Schofield G.	Associations Between the Neighborhood Environment and Moderate-to-Vigorous Walking in New Zealand Children: Findings from the URBAN Study	2016	Sports Medicine	10.1007/s40279-016-0533-x		Scopus
	y	n	y	y		What is already known about this topic? Physical activity has health benefits for persons of all ages. Currently, approximately one in four youths is active enough to meet the aerobic physical activity guideline. Strategies to improve the built environment, such as ensuring the safety and availability of sidewalks or locating parks and recreation facilities nearby, are recommended approaches to p…	Watson K.B., Harris C.D., Carlson S.A., Dorn J.M., Fulton J.E.	Disparities in adolescents’ residence in neighborhoods supportive of physical activity — United States, 2011-2012	2016	Morbidity and Mortality Weekly Report	10.15585/mmwr.mm6523a2		Scopus
	n	n	n	n		Background: Traffic exhaust, refineries and industrial facilities are major sources of air toxics identified by the U.S. Environmental Protection Agency (U.S. EPA) for their potential risk to human health. In utero and early life exposures to air toxics such as benzene and 1,3-butadiene, which are known leukemogens in adults, may play an etiologic role in childhood leukemia that comprises the maj…	Symanski E., Tee Lewis P.G., Chen T.-Y., Chan W., Lai D., Ma X.	Air toxics and early childhood acute lymphocytic leukemia in Texas, a population based case control study	2016	Environmental Health: A Global Access Science Source	10.1186/s12940-016-0154-8	1,3-Butadiene; Acute lymphocytic leukemia; Air toxics; Benzene; Childhood cancer; Childhood leukemia; Epidemiology; Polycyclic organic matter; POM	Scopus
physical activity	y	y	y	y		Background: The neighborhood environment has the potential to influence children's participation in physical activity. However, children's outdoor play is controlled by parents to a great extent. This study aimed to investigate whether parents' perceptions of the neighborhood environment and the objectively measured neighborhood environment were associated with children's moderate-to-vigorous int…	Uys M., Broyles S.T., Draper C.E., Hendricks S., Rae D., Naidoo N., Katzmarzyk P.T., Lambert E.V.	Perceived and objective neighborhood support for outside of school physical activity in South African children	2016	BMC Public Health	10.1186/s12889-016-2860-0		Scopus
	y	y	y	y		The aim of this paper is to describe the availability of and use of nearby outdoor spaces along a nature continuum by Norwegian children. We carried out a nationwide survey of 3 160 parents with children aged 6-12 years, using a comprehensive web-based questionnaire. Results from the survey show forests are the most common outdoor space in residential areas in Norway. In all, 97% of parents state…	Gundersen V., Skår M., O'Brien L., Wold L.C., Follo G.	Children and nearby nature: A nationwide parental survey from Norway	2016	Urban Forestry and Urban Greening	10.1016/j.ufug.2016.04.002	Childhood; Free play; Natural environment; Outside play; Playground; Urban forest	Scopus
	n	n	y	y		Guided by Bronfenbrenner's (1977) ecological framework, we investigated the correlates of changes in early adolescents' emotional, conduct, social and academic difficulties over a 2-year period of time. A representative sample of Australian early adolescents (N = 3797, 51% boys) completed questionnaires and interviews when they were age 10 (T1) and two years later at age 12 (T2). Parents also par…	Rowe S.L., Zimmer-Gembeck M.J., Hood M.	From the child to the neighbourhood: Longitudinal ecological correlates of young adolescents' emotional, social, conduct, and academic difficulties	2016	Journal of Adolescence	10.1016/j.adolescence.2016.04.001	Australia; Ecological; Persistence; Temperament; Young adolescents	Scopus
	y	y	y	y		Occupational therapists believe that play is a child's main occupation and is considered essential for healthy motor, cognitive and emotional development. However, play spaces and activities in low socio-economic areas are often different to those provided in structured occupational therapy treatment environments. The main objective was to determine play opportunities, activities, equipment, toys…	Bartie M., Dunnell A., Kaplan J., Oosthuizen D., Smit D., van Dyk A., Cloete L., Duvenage M.	The Play Experiences of Preschool Children from a Low-socio-economic Rural Community in Worcester, South Africa	2016	Occupational Therapy International	10.1002/oti.1404	Child; Low socio-economic; Paediatric occupational therapy; Play and playthings; Preschool; South Africa	Scopus
	n	n	y	y		Neighborhood disadvantage plays a pivotal role in child mental health, including child antisocial behavior (e.g., lying, theft, vandalism; assault, cruelty). Prior studies have indicated that shared environmental influences on youth antisocial behavior increase with increasing disadvantage, but researchers have been unable to confirm that these findings persist once various selection confounds ar…	Burt S.A., Klump K.L., Gorman-Smith D., Neiderhiser J.M.	Neighborhood disadvantage alters the origins of children’s nonaggressive conduct problems	2016	Clinical Psychological Science	10.1177/2167702615618164	Antisocial behavior; Conduct problems; Genetic; Neighborhood poverty	Scopus
	n	y	y	y		Most previous studies examining physical activity in Public Open Spaces (POS) focused solely on the physical environment. However, according to socio-ecological models the social environment is important as well. The aim of this study was to determine which social and physical environmental factors affect adolescents' visitation and physical activity in POS in low-income neighbourhoods. Since cur…	Van Hecke L., Deforche B., Van Dyck D., De Bourdeaudhuij I., Veitch J., Van Cauwenberg J.	Social and physical environmental factors influencing adolescents' physical activity in urban public open spaces: A qualitative study using walk-along interviews	2016	PLoS ONE	10.1371/journal.pone.0155686		Scopus
	n	n	n	n		To better understand the risks of exposure for young children to fecal contamination in their environment, we systematically characterized and quantified behaviors of 154 children, 0-5 years old, in four high-density, low-income neighborhoods in Accra, Ghana. A repertoire of six different activities and five different compartments (categories of locations within the household) was developed, and …	Teunis P.F.M., Reese H.E., Null C., Yakubu H., Moe C.L.	Quantifying contact with the environment: Behaviors of young children in Accra, Ghana	2016	American Journal of Tropical Medicine and Hygiene	10.4269/ajtmh.15-0417		Scopus
	n	n	n	n		Lumber pressure-treated with micronized copper was examined for the release of copper and copper micro/nanoparticles using a surface wipe method to simulate dermal transfer. In 2003, the wood industry began replacing CCA treated lumber products for residential use with copper based formulations. Micronized copper (nano to micron sized particles) has become the preferred treatment formulation. The…	Platten W.E., III, Sylvest N., Warren C., Arambewela M., Harmon S., Bradham K., Rogers K., Thomas T., Luxton T.P.	Estimating dermal transfer of copper particles from the surfaces of pressure-treated lumber and implications for exposure	2016	Science of the Total Environment	10.1016/j.scitotenv.2015.12.108	Copper exposure; Copper speciation; Ionic copper; Micronized copper azole; Nanoparticle; Pressure-treated wood	Scopus
	n	n	n	n		The aim of this study was to assess childhood lead exposure in a representative sample of Cairo, and to investigate the possible risk factors and sources of exposure. This cross-sectional study was conducted from November 2014 through April 2015. The target population was children aged 6 to 18 years, recruited into 4 groups, garbage city, moderate-living standard area, urban and suburban schools,…	Moawad E.M.I., Badawy N.M., Manawill M.	Environmental and occupational lead exposure among children in Cairo, Egypt: A community-based cross-sectional study	2016	Medicine (United States)	10.1097/MD.0000000000002976		Scopus
	y	n	y	y		Objectives: Overall physical activity (PA) of children is low, and the physical inactivity problem is highest in deprived neighborhoods. The overall goal of the Richard Krajicek Foundation is to provide children in deprived neighborhoods with safe public playgrounds that stimulate daily PA. This study investigates whether Krajicek playgrounds are associated with higher usage and intensity of PA c…	Boonzajer Flaes S.A.M., Chinapaw M.J.M., Koolhaas C.M., van Mechelen W., Verhagen E.A.L.M.	More children more active: Tailored playgrounds positively affect physical activity levels amongst youth	2016	Journal of Science and Medicine in Sport	10.1016/j.jsams.2015.03.001	Child; Environment; Exercise; Motor activity; Multilevel analysis; Play and playthings	Scopus
	n	n	n	n		Objectives: To provide novel quantification and advanced measurements of surface temperatures (Ts) in playgrounds, employing multiple scales of data, and provide insight into hot-hazard mitigation techniques and designs for improved environmental and public health. Methods: We conduct an analysis of Ts in two Metro-Phoenix playgrounds at three scales: neighborhood (1km resolution), microscale (6.…	Vanos J.K., Middel A., McKercher G.R., Kuras E.R., Ruddell B.L.	Hot playgrounds and children's health: A multiscale analysis of surface temperatures in Arizona, USA	2016	Landscape and Urban Planning	10.1016/j.landurbplan.2015.10.007	Bioclimatic urban design; Children's health; Geographic scale; Playgrounds; Surface temperature; Urban climate	Scopus
	y	n	n	n		Proximity to a park does not necessarily imply access or use, and the social environment may positively or negatively influence the positive intentions of the built environment. To investigate parks, park use and physical activity, and their associations with exposure to community violence, we interviewed residents (n = 354) of a densely populated urban community. Our findings indicate that proxi…	Ou J.Y., Levy J.I., Peters J.L., Bongiovanni R., Garcia-Soto J., Medina R., Scammell M.K.	A walk in the park: The influence of urban parks and community violence on physical activity in Chelsea, MA	2016	International Journal of Environmental Research and Public Health	10.3390/ijerph13010097	Built environment; Latino; Parks; Physical activity; Safety; Urban environment	Scopus
					重复	Introduction: Social conduct is a behaviour aimed at the society and among members of the same species, having influence in the surrounding environment, where ludic actions may play a role. Objective: The paper studies the effect of 15 recreational activities on the social behavior of children and adolescents in the Guamani neighborhood, south of the city of Quito, Republic of Ecuador. Method: Us…	Morales S.C., Lorenzo A.F., de La Rosa F.L.C.	Recreation activities to improve social behavior. Study in children and adolescents aged 9-14 [Actividades recreativas para mejorar la conducta social. Estudio en niños y adolescentes entre 9-14 años]	2016	Revista Cubana de Medicina General Integral		Adolescents; Ecuador; Recreational activities; Social behavior	Scopus
	n	n	n	n		Background and Aim: According to the World Health Organization (WHO) more than 2 million premature deaths and 7 million of total deaths each year can be attributed to the effects of air pollution. The contribution of air pollution to the health status of population is estimated to be about 20%. Health is largely determined by factors outside the reach of healthcare sector, including low income, u…	Šlachtová H., Jiřík V., Tomášek I., Tomášková H.	Environmental and socioeconomic health inequalities: A review and an example of the industrial Ostrava region	2016	Central European Journal of Public Health	10.21101/cejph.a4535	Environmental inequity; Health valuation; Ostrava region; Socio-spatial differentiation; Socioeconomic health inequalities	Scopus
	y	n	y	n		W. E. B. Du Bois's perspective on education was that the social and physical environments outside of schools matter to the learning that takes place inside schools. Existing research shows that due to environmental disparities in school and neighborhood contexts, Black and low-income children spend less time in activities that promote physical, cognitive, and social capabilities. These outside en…	Ray R., Fisher D.R., Fisher-Maltese C.	SCHOOL GARDENS in the CITY: Does Environmental Equity Help Close the Achievement Gap?	2016	Du Bois Review	10.1017/S1742058X16000229	Achievement Gap; Black; Education; Environment; Race; Racism; School Gardens; Social Inequality	Scopus
将游戏作为一种遗产传承下去，可以引用	n	y	y	n		Playing is not only a benefit for children’s psychological and social developments, but also a physiological need. Therefore, playing is a necessity for children. For this reason, children settle down to play whenever they need it, regardless of the convenience of environment or the moment. They never search "spare time" for playing. For edults, on the other hand, children should play only if the…	Karaca M.	Play factor in children’s cultural development children’s games played around çankırı [Çocuklarin kültürel gelişiminde oyun faktörü çankiri yöresinde oynanan çocuk oyunlari]	2016	Milli Folklor		Children’s plays; Play; Çankırı	Scopus
	n	n	y	n		Background: Childhood asthma is a complex disorder in which many environmental and personal factors play a role. However, the contribution of these factors to asthma severity is poorly understood. This study aims to determine the relationship between environmental exposures, personal factors and asthma severity among asthmatic children. Methods: This cross-sectional hospital based study was condu…	Elkheir O.I.A., Hafez M.R., Mohamed S.I.	Environmental and personal factors related to asthma severity among children: Hospital based study, Egypt	2016	Epidemiology Biostatistics and Public Health	10.2427/11718		Scopus
	y	y	y	y		Objective: Previous research identified associations between perceived built environment and adult physical activity; however, fewer studies have explored associations in children. The Built Environment and Active Play (BEAP) Study examined relationships between children's active play and parental perceptions of home neighborhood built environments within the Washington, DC metropolitan area (DMV…	Roberts J.D., Knight B., Ray R., Saelens B.E.	Parental perceived built environment measures and active play in Washington DC metropolitan children	2016	Preventive Medicine Reports	10.1016/j.pmedr.2016.04.001	Active play; BEAP study; Built environment; Parental perceptions	Scopus
	n	n	n	n		Introduction: Nutritional status during adolescence plays an important role in the human lifecycle that influences growth and development and during this period nutrient needs are the greatest. The objective of this study is to assess anaemia and nutritional status of adolescent girls in the Babile district, Eastern Ethiopia. Methods: Data were collected from 547 adolescent aged 10-19 years by cr…	Teji K., Dessie Y., Assebe T., Abdo M.	Anaemia and nutritional status of adolescent girls in Babile District, Eastern Ethiopia	2016	Pan African Medical Journal	10.11604/pamj.2016.24.62.6949	Adolescent; Anemia; BMI for age; Stunting	Scopus
	n	n	n	n		Background: Built environment and policy interventions are effective strategies for controlling the growing worldwide deaths from physical inactivity-related non-communicable diseases. To improve built environment research and develop African specific evidence, it is important to first tailor built environment measures to African contexts and assess their psychometric properties across African co…	Oyeyemi A.L., Kasoma S.S., Onywera V.O., Assah F., Adedoyin R.A., Conway T.L., Moss S.J., Ocansey R., Kolbe-Alexander T.L., Akinroye K.K., Prista A., Larouche R., Gavand K.A., Cain K.L., Lambert E.V., Aryeetey R., Bartels C., Tremblay M.S., Sallis J.F.	NEWS for Africa: Adaptation and reliability of a built environment questionnaire for physical activity in seven African countries	2016	International Journal of Behavioral Nutrition and Physical Activity	10.1186/s12966-016-0357-y	Active transportation; Community design; Neighborhood; Play; Recreation; Walkability	Scopus
	n	n	y	n		Objectives: The purpose of this study was to examine how pre- and early adolescent (10–14 years old) children from a wide range of neighbourhoods interact with their local food environment (FE), with a focus on the foods and food sources they access and their locations. Children in this age group are developing independence and mobility within (and beyond) their home neighbourhoods but are somewh…	Engler-Stringer R., Schaefer J., Ridalls T.	An examination of the roles played by early adolescent children in interactions with their local food environment	2016	Canadian Journal of Public Health	10.17269/CJPH.107.5296	Children; Diet; Eating; Environment; Food and nutrition	Scopus
	n	n	y	y		Background: To combat the disproportionately higher risk of childhood obesity in Latino preschool-aged children, multilevel interventions targeting physical (in) activity are needed. These require the identification of environmental and psychosocial determinants of physical (in) activity for this ethnic group. The objectives were to examine differences in objectively-measured physical activity an…	Cerin E., Baranowski T., Barnett A., Butte N., Hughes S., Lee R.E., Mendoza J.A., Thompson D., O'Connor T.M.	Places where preschoolers are (in)active: An observational study on Latino preschoolers and their parents using objective measures	2016	International Journal of Behavioral Nutrition and Physical Activity	10.1186/s12966-016-0355-0	Accelerometry; Global positioning system; Neighborhood perceptions; Parenting practices; Physical activity locations; Preschool-aged children; Sedentary behavior	Scopus
	n	n	y	y		Objectives: (1) To investigate differences in healthrelated, home and neighbourhood environmental variables between Liverpool children living in areas of high deprivation (HD) and medium-to-high deprivation (MD) and (2) to assess associations between these perceived home and neighbourhood environments and health-related variables stratified by deprivation group. Design: Cross-sectional study. Set…	Noonan R.J., Boddy L.M., Knowles Z.R., Fairclough S.J.	Cross-sectional associations between high-deprivation home and neighbourhood environments, and health-related variables among Liverpool children	2016	BMJ Open	10.1136/bmjopen-2015-008693		Scopus
	n	n	y	n		This study uses service area-based coverage and Poisson regression methods to assess the neighborhood fresh food environment (supermarkets, local grocery stores, farmers' markets, and community gardens), and investigates the fresh food access in association with different socio-economic groups in Edmonton, Canada. Primary results include that (1) deprived neighborhoods with a larger percentage of…	Wang H., Qiu F.	Fresh food access revisited	2016	Cities	10.1016/j.cities.2015.11.026	Fresh food environment; Poisson regression; Public transportation; Service area; Socio-economic status	Scopus
	n	n	y	n		This paper describes the results of a preliminary project conducted by a team of DePaul University undergraduate students and staff from the Gary Comer Youth Center located on Chicago's South Side. The team assessed soil quality on 116 samples collected among four abandoned residential lots adjacent to the Comer Center. Soil quality data will be used in a follow-up study to determine the suitabil…	Montgomery J.A., Klimas C.A., Arcus J., DeKnock C., Rico K., Rodriguez Y., Vollrath K., Webb E., Williams A.	Soil quality assessment is a necessary first step for designing urban green infrastructure	2016	Journal of Environmental Quality	10.2134/jeq2015.04.0192		Scopus
	y	y	y	n		Promoting outdoor play and participation in sports and organized physical activities in children may depend on neighborhood characteristics. This study investigated associations between neighborhood streets and physical activities among Mexican children (N = 1,509, 6-11 years). Child sociodemographic characteristics and physical activity were measured in schools in Guadalajara (n = 10), Mexico Ci…	Lee R.E., Soltero E.G., Jáuregui A., Mama S.K., Barquera S., Jauregui E., Lopez y Taylor J., Ortiz-Hernández L., Lévesque L.	Disentangling Associations of Neighborhood Street Scale Elements With Physical Activity in Mexican School Children	2016	Environment and Behavior	10.1177/0013916515615389	children; gender; Mexico; organized sports; outdoor play; parents; perception of safety; physical activity; safety	Scopus
	n	n	n	n		Families in low-income neighborhoods sometimes lack access to supermarkets that provide a broad range of healthy foods. We investigate whether these so called "food deserts" play a role in childhood obesity using a statewide panel data set of Arkansas elementary schoolchildren. We use fixed-effects panel data regression models to estimate the average food desert effect. We next compare children w…	Thomsen M.R., Nayga R.M., Alviola P.A., Rouse H.L.	The Effect of Food Deserts on the Body Mass Index of Elementary Schoolchildren	2016	American Journal of Agricultural Economics	10.1093/ajae/aav039	BMI z-score; built environment; childhood obesity; difference-in-differences; food deserts; panel data estimation	Scopus
	y	y	y	y		Playgrounds are important features of residential areas. Their design influences child play behaviour, particularly ‘pretend play’. With a growing number of young families moving into new suburbs, investigation into the extent to which pretend play is considered in playground design is an important planning issue. This is the focus of this research. Three playgrounds in Perth, Western Australia, …	Oke A., Middle G.J.	Planning Playgrounds to Facilitate Children’s Pretend Play: A Case Study of New Suburbs in Perth Western Australia	2016	Planning Practice and Research	10.1080/02697459.2015.1081336	design; planning; playground; pretend play; risk	Scopus
	y	n	n	y		The aims of the present study were to assess the association of environmental perception with objective and self-reported physical activity (PA) and the relation between environmental perception and meeting PA recommendations on children and adolescents. A sample of 1520 youth (770 boys) aged 8-18 years (12.1 ± 2.5 years) from the UP&amp;DOWN study were included in the data analyses. Environmenta…	García-Cervantes L., Rodríguez-Romo G., Esteban-Cornejo I., Cabanas-Sanchez V., Delgado-Alfonso Á., Castro-Piñero J., Veiga Ó.L., Marcos A., Gomez-Martinez S., Nova E., Diaz L.-E., Zapatera B., Veses A.M., Mujico J.R., Hernandez A., Gheorghe A., Mora-Vicente J., Gonzalez-Montesinos J.L., Conde-Caveda J., Ruiz J.R., Ortega F.B., Moledo C.P., Carbonell-Baeza A., Fernandez J.R., Chillon P., Guerra G…	Perceived environment in relation to objective and self-reported physical activity in Spanish youth. The UP&DOWN study	2016	Journal of Sports Sciences	10.1080/02640414.2015.1116708	Accelerometry; Adolescents; Children; Neighbourhood; Physical activity	Scopus
	n	n	n	n		Nasopharyngeal carcinoma (NPC) is an epithelial tumour with a distinctive racial and geographical distribution. High incidence of NPC has been reported from China, Southeast Asia, and northeast (NE) region of India. The immune mechanism plays incredibly role in pathogenesis of NPC. Tumour necrosis factors (TNFs) and heat shock protein 70 (HSP 70) constitute significant components of innate as wel…	Lakhanpal M., Singh L.C., Rahman T., Sharma J., Singh M.M., Kataki A.C., Verma S., Pandrangi S.L., Singh Y.M., Wajid S., Kapur S., Saxena S.	Study of single nucleotide polymorphisms of tumour necrosis factors and HSP genes in nasopharyngeal carcinoma in North East India	2016	Tumor Biology	10.1007/s13277-015-3767-6	HSP; Nasopharyngeal cancer; Northeast India; Single nucleotide polymorphism; TNF	Scopus
	y	n	y	n		Background: Children can be highly active and highly sedentary on the same day! For instance, a child can spend a couple of hours playing sports, and then spend the rest of the day in front of a screen. A focus on examining both physical activity and sedentary behaviour throughout the day and in all seasons in a year is necessary to generate comprehensive evidence to curb childhood obesity. To ac…	Muhajarine N., Katapally T.R., Fuller D., Stanley K.G., Rainham D.	Longitudinal active living research to address physical inactivity and sedentary behaviour in children in transition from preadolescence to adolescence	2015	BMC Public Health	10.1186/s12889-015-1822-2		Scopus
	n	n	y	n		Background: Little is known about preschool parents' cognitions, barriers, supports and modeling of key obesogenic behaviors, including breakfast, fruit and vegetable consumption, sugary beverage intake, feeding practices, portion sizes, active playtime, reduced screen-time, sleep and selection of child-care centers with characteristics that promote healthy behaviors. Methods: Thus, the purpose o…	Martin-Biggers J., Spaccarotella K., Hongu N., Alleman G., Worobey J., Byrd-Bredbenner C.	Translating it into real life: A qualitative study of the cognitions, barriers and supports for key obesogenic behaviors of parents of preschoolers	2015	BMC Public Health	10.1186/s12889-015-1554-3	Home environment; Obesity; Preschoolers	Scopus
环境教育可以减少儿童对户外自然游戏的恐惧	y	y	y	n		Our work assessed the influence of an urban environmental education program on children’s attitudes toward outdoor play, as well as knowledge of neighborhood features that can facilitate this type of activity. The project team engaged 6 schools near the newest Urban Ecology Center location in Milwaukee, Wisconsin, USA, through a community-academic partnership entitled More Than a Pretty Place. In…	Beyer K.M.M., Heller E.F., Bizub J.M., Kistner A.J., Szabo A., Shawgo E.E., Zetts C.J.	More than a pretty place: assessing the impact of environmental education on children’s knowledge and attitudes about outdoor play in nature	2015	International Journal of Environmental Research and Public Health	10.3390/ijerph120202054	ATOP scales; Barriers to nature; Children’s outdoor play; Fear; Urban environmental education	Scopus
	n	n	n	n		Purpose – The contribution of the built environment within communities plays a significant role in the higher rates of childhood obesity, particularly among black and Hispanic youth. The purpose of this paper is to investigate neighborhood assets and barriers to nutrition and physical activity in an underserved, majority-minority suburban community in New York State, USA using Photovoice, a commu…	Hackett M., Gillens- Eromosele C., Dixon J.	Examining childhood obesity and the environment of a segregated, lower-income US suburb	2015	International Journal of Human Rights in Healthcare	10.1108/IJHRH-09-2014-0021	Childhood obesity; Civic engagement; Community-based participatory research; Policymakers; Race; Suburbs	Scopus
	n	n	n	n		The prevalence of violence in South African (notably disadvantaged) schools has shifted from the apartheid to the post-apartheid landscape. The levels of violence in post-apartheid (notably disadvantaged) schools is so rampant that researchers have shown that children have a greater chance of encountering violence in schools than in their homes (Leoschut & Bonora 2007:107). Adding to this scourge…	Davids N., Waghid Y.	On speaking to violence in post-apartheid schools [Geweld in post-apartheid skole -waar lê die oplossing?]	2015	Tydskrif vir Geesteswetenskappe	10.17159/2224-7912/2015/v55n4a12	Citizenship education; Cobelonging; Encounters; Enframing; Post-apartheid schools; Potentiality; School community becoming; Summoning to speech; Violence	Scopus
	n	n	n	n		OBJECTIVES: In curbing physical inactivity, as behavioural interventions directed at individuals have not produced a population-level change, an ecological perspective called active living research has gained prominence. However, active living research consistently underexplores the role played by a perennial phenomenon encompassing all other environmental exposures-variation in weather. After fa…	Katapally T.R., Rainham D., Muhajarine N.	Factoring in weather variation to capture the influence of urban design and built environment on globally recommended levels of moderate to vigorous physical activity in children	2015	BMJ open	10.1136/bmjopen-2015-009045	EPIDEMIOLOGY; PUBLIC HEALTH; STATISTICS & RESEARCH METHODS	Scopus
	n	n	n	n		In the appraisal of head lice outbreak, in addition to socioeconomic factors and availability of health care services, environmental conditions of the households must be taken into account. However, interviewing with children or mailing questionnaires to families may not reflect the actualities. Therefore, in this study, all the inclusive factors which may be associated with head lice outbreak we…	Dehghanzadeh R., Asghari-Jafarabadi M., Salimian S., Asl Hashemi A., Khayatzadeh S.	Impact of family ownerships, individual hygiene, and residential environments on the prevalence of pediculosis capitis among schoolchildren in urban and rural areas of northwest of Iran	2015	Parasitology Research	10.1007/s00436-015-4670-1	Environmental factors; Head lice; Students; Urban and rural	Scopus
	n	n	n	n		Wood preservatives can protect wood from dry rot, fungi, mould and insect damage, and chromated copper arsenate (CCA) has been used as an inorganic preservative for many years. However, wood treated with CCA has been restricted from residential uses in the EU from June 30, 2004, due to its potential toxicity. Such a regulation is not in place in China yet, and CCA-treated wood is widely used in p…	Tang Y., Gao W., Wang X., Ding S., An T., Xiao W., Wong M.H., Zhang C.	Variation of arsenic concentration on surfaces of in-service CCA-treated wood planks in a park and its influencing field factors	2015	Environmental Monitoring and Assessment	10.1007/s10661-014-4214-7	Arsenic; Chromated copper arsenate (CCA); Immersion; In-service; Portable XRF; Wood	Scopus
	n	n	n	n		This article explores how small cities use cycling for both residential transportation and active tourism. While cycling may be child's play, and indeed a part of childhood socialization, the 'pushbike' has a role in regional development. Our work investigates cycling and cycling policy. We then focus on one small city at the southern tip of Western Australia. Albany is attempting to transform it…	Brabazon T., McRae L., Redhead S.	The pushbike song: Rolling physical cultural studies through the landscape	2015	Human Geographies	10.5719/hgeo.2015.92.5	Albany; Bicycling; Cycling; Regional development; Trans-localism	Scopus
	y	n	y	n		This review examines different ways that contact with nature can contribute to the health and well-being of children. Applying the capabilities approach to human development for a broad definition of well-being, it traces research from the 1970s to the present, following shifting research approaches that investigate different dimensions of health. A compelling body of evidence exists that trees a…	Chawla L.	Benefits of Nature Contact for Children	2015	Journal of Planning Literature	10.1177/0885412215595441	adolescents; children; health; neighborhood planning; recreation and open space; urban design	Scopus
	n	y	y	y		This study explored the extent to which the enormous development in Bandung City, Indonesia has some bearing on local children as the youngest inhabitants. In particular, it focused on the issue of children's independent mobility and the availability of friendly play environments in children's neighbourhoods. The result of this study showed that the development of Bandung City has created a dispa…	Drianda R.P., Kinoshita I., Said I.	The Impact of Bandung City's Rapid Development on children's Independent Mobility and Access to Friendly Play Environments	2015	Children and Society	10.1111/chso.12105	Childhood; Children; Indonesia; Play	Scopus
	n	n	y	n		Objective:The main objective of this study was to investigate whether children's perceptions of neighborhood safety are associated with their weight status and weight-related behaviors, independently of their parents' perceptions.Methods:Data were from the baseline wave (collected in 2005-2008) of the Quebec Adipose and Lifestyle Investigation in Youth (QUALITY), an ongoing prospective study of 6…	Côté-Lussier C., Mathieu M.-E., Barnett T.A.	Independent associations between child and parent perceived neighborhood safety, child screen time, physical activity and BMI: A structural equation modeling approach	2015	International Journal of Obesity	10.1038/ijo.2015.98		Scopus
	n	n	n	y		A waste audit and a household questionnaire survey were conducted in high-density housing estates in one of the most economically and socially deprived areas of England (Haringey, London). Such areas are under-represented in published research. The study examined source segregation, potential participation in a food waste segregation scheme, and food waste prevention activities in five estates (1…	Rispo A., Williams I.D., Shaw P.J.	Source segregation and food waste prevention activities in high-density households in a deprived urban area	2015	Waste Management	10.1016/j.wasman.2015.04.010	Food waste; Recycling; Social deprivation; Waste prevention	Scopus
	n	y	y	y		Objective: It is often hypothesised that neighbourhood green space may help prevent well-known declines in physical activity and increases in sedentary behaviour that occur across childhood. As most studies in this regard are cross-sectional, the purpose of our study was to use longitudinal data to examine whether green space promotes active lifestyles as children grow older. Methods: Data came f…	Sanders T., Feng X., Fahey P.P., Lonsdale C., Astell-Burt T.	The influence of neighbourhood green space on children's physical activity and screen time: Findings from the longitudinal study of Australian children	2015	International Journal of Behavioral Nutrition and Physical Activity	10.1186/s12966-015-0288-z	Children; Green space; Longitudinal data; Physical activity; Screen time	Scopus
	n	n	n	y		The purpose of this study was to examine the role of neighborhood disadvantage and perceptions of neighborhood on the development of aggressive behavior among a sample of urban low-income African American middle school aged youth (mean age = 11.65 years). Results of hierarchical linear modeling indicated that youth experienced significant changes in rates of aggression across the three middle sch…	Romero E., Richards M.H., Harrison P.R., Garbarino J., Mozley M.	The Role of Neighborhood in the Development of Aggression in Urban African American Youth: A Multilevel Analysis	2015	American Journal of Community Psychology	10.1007/s10464-015-9739-6	African American youth; Aggression; Neighborhoods	Scopus
	y	y	y	y		Children's freedom to play is more dependent on the public realm (streets, pavements, verges, incidental open space, front gardens) than it is on playgrounds and parks. Children play where road design slows traffic down (street play). Play strategies which concentrate on the provision of play facilities are flawed because increased provision cannot compensate for the reduction in children's freed…	Wheway R.	Opportunities for free play	2015	International Journal of Play	10.1080/21594937.2015.1106048	children's play; environment; play strategies; play streets; street play	Scopus
	n	n	n	n		This paper explores how Anishinabek women managed their households during the hydroelectric boom of the 1950s and provides new insight into flooding impact analyses. To date, historians have sought to understand how hydroelectric development compromised "subsistence" living. Research has addressed declining fish and game populations and the corresponding decline in male employment. But, what do t…	Luby B.	From Milk-Medicine To Public (Re)Education Programs: An Examination Of Anishinabek Mothers' Responses To Hydroelectric Flooding In The Treaty #3 District, 1900-1975	2015	Canadian bulletin of medical history = Bulletin canadien d'histoire de la medecine	10.3138/cbmh.32.2.363	food insecurity; hydroelectricity; hydroélectricité; insécurité alimentaire; methylmercury; Méthylmercure; reproductive health; santé reproductive	Scopus
	n	n	n	n		This article addresses how neoliberalism as a utopian ideal of the urban affects the practices of planners and parents, drawing on Stockholm, Sweden, as an example and foregrounding how these adult conceptions of the city are manifested, both socially and physically, and shape children's geographies. Through an analysis of planning documents and interviews with planners and parents, this study sh…	Cele S.	Childhood in a neoliberal utopia: Planning rhetoric and parental conceptions in contemporary stockholm	2015	Geografiska Annaler, Series B: Human Geography	10.1111/geob.12078	Children; Neoliberalism; Parents; Planners; Stockholm; Welfare planning	Scopus
	n	n	n	n		Background/Aim. Due to their low tolerance to pollutants and hand-to-mouth pathways the health risk is very high in children’s population. The aim of this study was to evaluate risk to children’s health based on the content of heavy metals in urban soil samples from Podgorica, Montenegro. This study included the investigation of several toxic metals such as Pb, Cd, Cu and Zn in soil samples from …	Mugoša B., Djurović D., Pirnat A., Bulat Z., Barjaktarović-Labović S.	Children’s health risk assessment based on the content of toxic metals Pb, Cd, Cu and Zn in urban soil samples of Podgorica, Montenegro [Procena rizika po zdravlje dece na osnovu sadržaja toksičnih metala Pb, Cd, Cu i Zn u gradskom zemljištu na teritoriji Podgorice, Crna Gora]	2015	Vojnosanitetski Pregled	10.2298/VSP130716062M	Child; Health; Heavy; Metals; Risk assessment; Soil	Scopus
	n	n	n	n		Concern about children's exposure to arsenic (As) from wood treated with chromated-copper-arsenate (CCA) led to its withdrawal from residential use in 2004. However, due to its effectiveness, millions of American homes still have CCA-wood decks on which children play. This study evaluated the effects of three deck-cleaning methods on formation of dislodgeable As and hexavalent chromium (CrVI) on …	Gress J., de Oliveira L.M., da Silva E.B., Lessl J.M., Wilson P.C., Townsend T., Ma L.Q.	Cleaning-induced arsenic mobilization and chromium oxidation from CCA-wood deck: Potential risk to children	2015	Environment International	10.1016/j.envint.2015.04.012	Chromated copper arsenate; Dislodgeable arsenic; Exposure; Hexavalent chromium; Soil	Scopus
	n	n	y	n		Background: It is well documented in the literature that low socioeconomic status (SES) is associated with lower consumption of healthy foods and that these differences in consumption patterns are influenced by neighborhood food environments. Less understood is the role that SES differences in physical and social aspects of the home food environment play in consumption patterns. Methods: Using da…	Ranjit N., Wilkinson A.V., Lytle L.M., Evans A.E., Saxton D., Hoelscher D.M.	Socioeconomic inequalities in children's diet: The role of the home food environment	2015	International Journal of Behavioral Nutrition and Physical Activity	10.1186/1479-5868-12-S1-S4	Healthy eating; Home food environment; Neighborhood; Socioeconomic disparities	Scopus
	n	n	n	n		Background: In developed countries, children's independent mobility levels are low. Built environmental factors and parental safety concerns are well-known to predict the level of independent mobility adults grant to children. In contrast, the influence of adults' socio-demographic characteristics and neighbourhood social cohesion on children's independent mobility is largely unexplored. This stu…	Schoeppe S., Duncan M.J., Badland H.M., Alley S., Williams S., Rebar A.L., Vandelanotte C.	Socio-demographic factors and neighbourhood social cohesion influence adults' willingness to grant children greater independent mobility: A cross-sectional study	2015	BMC Public Health	10.1186/s12889-015-2053-2	Community cohesion; Movement; Parent; Survey; Unsupervised; Young people	Scopus
	n	n	n	n		Introduction: Several studies in developed countries have shown association between indoor air pollution and asthma in children. The present research was undertaken to study this association at Delhi, India. Material and methods: This study took place at Delhi, capital of India. Eight locations based on the source of pollution such as industrial, residential and villages were included. Recording …	Kumar R., Nagar J.K., Goel N., Kumar P., Kushwah A.S., Gaur S.N.	Indoor air pollution and asthma in children at Delhi, India	2015	Pneumonologia i Alergologia Polska	10.5603/PiAP.2015.0047	Asthmatic children; Indoor air pollution; NO2; SO2; SPM; Wheezing	Scopus
	n	n	n	n		Background: Ultrafine particles (UFP) may contribute to the cardiovascular effects of particulate air pollution, partly because of their relatively efficient alveolar deposition. Objective: In this study, we assessed associations between blood pressure and short-term exposure to air pollution in a population of schoolchildren. Methods: In 130 children (6–12 years of age), blood pressure was deter…	Pieters N., Koppen G., van Poppel M., de Prins S., Cox B., Dons E., Nelen V., Panis L.I., Plusquin M., Schoeters G., Nawrot T.S.	Blood pressure and same-day exposure to air pollution at school: Associations with nano-sized to coarse PM in children	2015	Environmental Health Perspectives	10.1289/ehp.1408121		Scopus
	y	n	n	n		Background: Parks are generally an under-utilized resource in the community with great potential to enhance levels of physical activity. If parks are to attract more visitors across a broad cross-section of the population and facilitate increased physical activity, research is needed to better understand park visitor characteristics and how visitors spend their time in parks. The Recording and EV…	Veitch J., Carver A., Abbott G., Giles-Corti B., Timperio A., Salmon J.	How active are people in metropolitan parks? An observational study of park visitation in Australia	2015	BMC Public Health	10.1186/s12889-015-1960-6	Observation; Park; Park visitor; Physical activity; Public open space	Scopus
	n	n	n	n		Endocrine-disrupting chemicals (EDCs) occur in reclaimed water (RW), which may serve as an exposure source for humans. The presence of EDCs in RW used to irrigate turf and in nearby water-retention ponds was determined. In addition, the total dislodgeable mass of each EDC was determined after irrigation (using RW) to simulate exposure of a 3-year-child playing in turf grass recently irrigated wit…	Sidhu H.S., Wilson P.C., O’Connor G.A.	Endocrine-Disrupting Compounds in Reclaimed Water and Residential Ponds and Exposure Potential for Dislodgeable Residues in Turf Irrigated With Reclaimed Water	2015	Archives of Environmental Contamination and Toxicology	10.1007/s00244-015-0147-6	Chlorpyrifos; Coprostanol; Retention Pond; Septic System; Turf Grass	Scopus
	n	n	y	y		As youth obesity rates remain at unacceptably high levels, particularly across underserved populations, the promotion of physical activity has become a focus of youth obesity prevention across the United States. Thus, the purpose of this study was to develop and test the reliability and validity of a self-reported questionnaire on home, school, and neighborhood physical activity environments for …	Slater S., Full K., Fitzgibbon M., Uskali A.	Test-Retest Reliability and Validity Results of the Youth Physical Activity Supports Questionnaire	2015	SAGE Open	10.1177/2158244015586809	built environment; physical activity; public health; reliability and validity; research methods; social sciences; youth	Scopus
	n	n	y	n		In African growing cities, vector-borne diseases (such as malaria and dengue) contribute to a large burden of childhood morbidity and mortality. During the peak of transmission, environmental factors can have an influence on those fevers, apart from the individual and household characteristics. A household survey conducted in 2008 in Dakar was completed by a community questionnaire on environment…	Dos Santos S., Rautu I., Diop M., Abdou Illou M.M., Ndonky A., Le Hesran J.-Y., Lalou R.	The influence of environmental factors on childhood fever during the rainy season in an African city: a multilevel approach in Dakar, Senegal	2015	Population and Environment	10.1007/s11111-014-0224-1	Child health; Environmental factors; Multilevel analysis; Senegal; Urban	Scopus
	n	n	n	n		Background: Leptospirosis is an emerging infectious disease, with increasing frequency and severity of outbreaks, changing epidemiology of populations at risk, and the emergence of new serovars. Environmental drivers of disease transmission include flooding, urbanisation, poor sanitation, changes in land use and agricultural practices, and socioeconomic factors. In Queensland, human infection wit…	Lau C.L., Skelly C., Dohnt M., Smythe L.D.	The emergence of Leptospira borgpetersenii serovar Arborea in Queensland, Australia, 2001 to 2013	2015	BMC Infectious Diseases	10.1186/s12879-015-0982-0	Eco-epidemiology; Emerging infectious diseases; Environmental health; Infectious disease epidemiology; Infectious disease outbreaks; Leptospira; Leptospirosis; Tropical medicine; Zoonoses	Scopus
	y	n	y	y		Background: Neighborhood characteristics may contribute to adiposity in young children, but results in the current literature are inconsistent. This study aimed to investigate whether objective (socioeconomic status (SES)) and subjective (perceived safety, satisfaction with green spaces and perceived physical disorder) neighborhood characteristics directly influence child adiposity (as measured b…	Jessica Hrudey E., Kunst A.E., Stronks K., Vrijkotte T.G.M.	Do neighborhood characteristics in Amsterdam influence adiposity at preschool age?	2015	International Journal of Environmental Research and Public Health	10.3390/ijerph120505561	Adiposity; Mixed models; Neighborhood characteristics; Preschool age	Scopus
	n	n	y	n		Intra-home and kindergarten transmissions were the reported major modes of hand, foot, and mouth disease (HFMD) transmission in preschool children. However, infection at home is not common and 65-80% of cases do not attend preschool. We conducted a matched case-control study to explore the role of public playgrounds in the transmission of HFMD in addition to direct and indirect exposure to HFMD p…	Xie Y.H., Chongsuvivatwong V., Tan Y., Tang Z.-Z., Sornsrivichai V., McNeil E.B.	Important roles of public playgrounds in the transmission of hand, foot, and mouth disease	2015	Epidemiology and Infection	10.1017/S0950268814002301	Enterovirus; epidemics; epidemiology; infectious disease control; infectious disease epidemiology	Scopus
	n	n	y	y		The diversity of people living in a city is often most visible on inner city streets. These streets are also the neighbourhood environment of children who live in the central city. In the past, the wellbeing and sensibilities of children have been marginalised in planning practices in western cities but this is beginning to change with child-friendly and inclusive city discourses now more common.…	Witten K., Kearns R., Carroll P.	Urban inclusion as wellbeing: Exploring children's accounts of confronting diversity on inner city streets	2015	Social Science and Medicine	10.1016/j.socscimed.2015.01.016	Children; Homelessness; Independent mobility; Inner city; Neighbourhood; New Zealand (NZ); Sex industry; Wellbeing	Scopus
	n	n	y	y		Aims: The aim of this study is to investigate associations of screen-time and physical activity (PA) with self-efficacy for PA, intrinsic motivation to PA and health-related quality of life (HRQoL) in Colombian schoolchildren from socioeconomically disadvantaged neighborhoods, and to compare these variables among children with normal-weight (NW), overweight (OW) and obesity (OB). Methods: In 678 …	Olaya-Contreras P., Bastidas M., Arvidsson D.	Colombian children with overweight and obesity need additional motivational support at school to perform health-enhancing physical activity	2015	Journal of Physical Activity and Health	10.1123/jpah.2014-0024	Health-related quality of life; Intrinsic motivation; Sedentary behavior; Self-efficacy	Scopus
	y	y	y	y		Previous research suggests the neighborhood environment may be an important influence on children's physical activity (PA) behaviors; however, findings are inconsistent. The purpose of this study was to further understand the relationship between perceptions of the neighborhood environment and children's afterschool moderate-to-vigorous PA. Utilizing a structural equation modeling technique, we t…	McDonald S., Dowda M., Colabianchi N., Porter D., Dishman R.K., Pate R.R.	Perceptions of the neighborhood environment and children's afterschool moderate-to-vigorous physical activity	2015	Pediatric Exercise Science	10.1123/pes.2014-0139	Exercise; Outdoors; Parent; School; Youth	Scopus
	n	n	n	n		Cities are generally described as urban jungles for everyday family life. This is mainly based on poor facilities for outdoor play. But children's everyday life consists of many more leisure activities. In this paper, we focus on family outings: the various ways children and parents consume the city. It is argued that family outings are important building blocks for growing up and cementing famil…	Karsten L., Felder N.	Parents and children consuming the city: geographies of family outings across class	2015	Annals of Leisure Research	10.1080/11745398.2015.1011679	cities; consumption spaces; family leisure; gentrifying neighbourhood; urban childhood	Scopus
	y	n	n	y		Background: Park features' association with physical activity among predominantly Hispanic communities is not extensively researched. The purpose of this study was to assess factors associated with park use and physical activity among park users in predominantly Hispanic neighborhoods. Methods: Data were collected across 6 parks and included park environmental assessments to evaluate park feature…	Dolash K., He M., Yin Z., Sosa E.T.	Factors that influence park use and physical activity in predominantly hispanic and low-income neighborhoods	2015	Journal of Physical Activity and Health	10.1123/jpah.2013-0226	Environment; Health behavior; Public health	Scopus
	n	n	y	n		Objective: An integrated perspective on the relevant qualitative findings on the experience of screen time in youth can inform the development of hypotheses to be tested in future research and can guide the development of interventions to decrease sedentary behavior. The purpose of this qualitative metasynthesis was to explore parent, youth, and educational professionals' perceptions of barriers …	Minges K.E., Owen N., Salmon J., Chao A., Dunstan D.W., Whittemore R.	Reducing youth screen time: Qualitative metasynthesis of findings on barriers and facilitators	2015	Health Psychology	10.1037/hea0000172	Qualitative; Review; Sedentary behavior; Television time; Youth	Scopus
	n	n	y	y		Previous research on contemporary childbearing has identified a strong relationship between environmental conditions, such as economic deprivation, and early fertility. Less is known, however, about the social-psychological mechanisms that mediate these environmental predictors of early fertility at the individual level and the extent to which they are consistent with life history theory. The aim…	Chipman A., Morrison E.	Family Planning: Fertility and Parenting Ideals in Urban Adolescents	2015	Archives of Sexual Behavior	10.1007/s10508-013-0254-2	Adolescence; Age of first birth; Grandparental investment; Life history theory; Perceived environmental risk	Scopus
	n	y	n	y		Background: More than 200,000 children each year are treated at emergency departments for injuries occurring on playgrounds. Empirically derived data are needed to elucidate factors associated with playground safety and reduce injury rates. Objective: Determine if neighborhood, park and playground characteristics are significantly associated with playground safety. Methods: A 24-item report card …	Suminski R., Presley T., Wasserman J.A., Mayfield C.A., McClain E., Johnson M.	Playground safety is associated with playground, park, and neighborhood characteristics	2015	Journal of Physical Activity and Health	10.1123/jpah.2013-0244	Cross-sectional; Demographics; Environment; Multi-level; Social economic income	Scopus
	n	n	n	n		The immune system plays a critical role in the prevention of infectious and chronic disease. We investigate associations between exposure to neighborhood immigrant concentration across the transition from adolescence to adulthood and immune function among Latino young adults, including moderation by nativity. Data from the National Longitudinal Study of Adolescent Health (1994-2008) were analyzed…	Ford J.L., Browning C.R.	Exposure to neighborhood immigrant concentration from adolescence to young adulthood and immune function among Latino young adults	2015	Health and Place	10.1016/j.healthplace.2014.12.010	Immigrant enclave; Immune function; Latinos; Neighborhood; Stress	Scopus
	y	y	y	y		A Play Street is a street that is reserved for children's safe play for a specific period during school vacations. It was hypothesized that a Play Street near children's home can increase their moderate- to vigorous-intensity physical activity (MVPA) and decrease their sedentary time. Therefore, the aim of this study was to investigate the effect of Play Streets on children's MVPA and sedentary t…	D'Haese S., Van Dyck D., De Bourdeaudhuij I., Deforche B., Cardon G.	Organizing "Play Streets" during school vacations can increase physical activity and decrease sedentary time in children	2015	International Journal of Behavioral Nutrition and Physical Activity	10.1186/s12966-015-0171-y	Active play; Children; Intervention; Neighborhood; Vacation	Scopus
	y	n	n	n		Features of the built environment that may influence physical activity (PA) levels are commonly captured using a so-called walkability index. Since such indices typically describe opportunities for walking in everyday life of adults, they might not be applicable to assess urban opportunities for PA in children. Particularly, the spatial availability of recreational facilities may have an impact o…	Buck C., Tkaczick T., Pitsiladis Y., De Bourdehaudhuij I., Reisch L., Ahrens W., Pigeot I.	Objective Measures of the Built Environment and Physical Activity in Children: From Walkability to Moveability	2015	Journal of Urban Health	10.1007/s11524-014-9915-2	Accelerometry; Built environment; Children; IDEFICS study; Moderate-to-vigorous physical activity; Walkability	Scopus
	n	y	y	y		Purpose: To produce a meta-study by completing a systematic review of qualitative research examining determinants of independent active free play in children. Method: Following systematic electronic and manual searches and application of inclusion/exclusion criteria, 46 studies were retained and subjected to meta-method, meta-theory, and meta-data analyses, followed by a final meta-synthesis. Res…	Lee H., Tamminen K.A., Clark A.M., Slater L., Spence J.C., Holt N.L.	A meta-study of qualitative research examining determinants of children's independent active free play	2015	International Journal of Behavioral Nutrition and Physical Activity	10.1186/s12966-015-0165-9	Meta-synthesis; Parents; Safety; Theory	Scopus
	n	n	n	n		Chronic exposure to urban traffic pollution is documented to promote atherosclerosis in adults but little is known about its potential effects in children. Our study examined the association of long-term exposure to traffic with carotid intima-media thickness (cIMT) in 287 healthy children. Residential proximity and distance-weighted traffic density (DWTD) were used as proximity markers for traff…	Armijos R.X., Weigel M.M., Myers O.B., Li W.-W., Racines M., Berwick M.	Residential exposure to urban traffic is associated with increased carotid intima-media thickness in children	2015	Journal of Environmental and Public Health	10.1155/2015/713540		Scopus
	n	y	y	y		The purpose of this study was to examine the association between the hours of outdoor play and objective measures of physical activity and identify the correlates of outdoor playing time in terms of parental perceptions of the neighbourhood environment. Time spent in outdoor play, both on a typical weekday and a typical weekend day, and neighbourhood perceptions, was assessed by parental self-rep…	Faulkner G., Mitra R., Buliung R., Fusco C., Stone M.	Children's outdoor playtime, physical activity, and parental perceptions of the neighbourhood environment	2015	International Journal of Play	10.1080/21594937.2015.1017303	neighbourhood environment; physical activity; play; safety	Scopus
	y	y	y	y		Nowadays playground looks stereotype because it is relies on manufactured products. This type of playground is more focusing on physical activity but less in generating social skills and cognitive development. Many believe that understanding of children?s active living in their relationship to build environment is possible through concept of affordance. Through this concept, it gives understandin…	Ismail N.A., Safiullah S.B., Yunos M.Y.M., Utaberta N., Ismail S.	Identifying natural playscape elements in a neighbourhood park: A case study of Kuantan, Malaysia	2015	Advances in Environmental Biology		Children; Natural environment; Playscape	Scopus
	n	n	n	n		Respiratory and neurological diseases in children such as asthma and air born chemicals have been linked together by health specialists in Europe and the United States [17] [16]. The impact of these findings in cities suggests not only knowledge of air quality but small-scale geospatial understanding of public space. High resolution air quality in the public space, where child as sensitive member…	Speranza P., Viader M.	High resolution air quality and urban design	2015	International Journal of Design Sciences and Technology		Design evaluation; Design informatics; Design methods; Geospatial information systems; Urban design	Scopus
	y	y	y	y		Background: Research has demonstrated that children who participate in active play are more likely to be physically active, thereby improving long-term health outcomes. Many adult studies have also shown that neighborhood built environments can encourage or discourage routine physical activity. Limited evidence has demonstrated that children who reside in neighborhoods with a built environment th…	Roberts J.D., Ray R., Biles A.D., Knight B., Saelens B.E.	Built environment and active play among Washington DC metropolitan children: A protocol for a cross-sectional study	2015	Archives of Public Health	10.1186/s13690-015-0070-3	Active play; BEAP study; Built environment; Physical activity; Playability	Scopus
	y	y	y	y		The objectives were to determine whether: (1) playability features differed across walkable and non-walkable school neighborhoods, and (2) physical activity differed in children living in walkable and non-walkable school neighborhoods. A total of 3912 grade 6-8 students from 132 school neighborhoods were studied. There was more developed park space in high walkability neighborhoods than low walka…	Janssen I., King N.	Walkable school neighborhoods are not playable neighborhoods	2015	Health and Place	10.1016/j.healthplace.2015.07.004	Child; Environment; Health surveys; Motor activity; Walking	Scopus
	n	n	n	n		This article focuses on British children's play as a medium through which to examine the construction of loyalist identities during the French Revolutionary and Napoleonic Wars. The display of juvenile patriotic identities was a significant feature of the neighbourhood political cultures formed in response to the invasion threat. Turning the spotlight on the 'cultural presence of children' demons…	Gleadle K.	Playing at soldiers: British loyalism and juvenile identities during the Napoleonic Wars	2015	Journal for Eighteenth-Century Studies	10.1111/1754-0208.12216	children; gender; loyalism; military service; Napoleonic Wars; play; public space; volunteers	Scopus
	n	n	n	n		The primary objective of this paper is to analyse households' adaptation measures to the impacts of repeated extreme weather events, specifically floods, which belong amongst the most serious manifestation of ongoing climate change in Europe. The case study focuses on a rural area in the north-east part of the Czech Republic, in the catchment basin of the Becva River. A total of 605 households we…	Stojanov R., Duží B., Danek T., Nemec D., Procházka D.	Adaptation to the impacts of climate extremes in central Europe: A case study in a rural area in the Czech Republic	2015	Sustainability (Switzerland)	10.3390/su70912758	Adaptation; Becva River; Climate extremes; Flood risk perception; Floods; Households; Risk management; Social inequality; The Czech Republic	Scopus
	n	n	n	n		Introduction: Access to safe sanitation in low-income, informal settlements of Sub-Saharan Africa has not significantly improved since 1990. The combination of a high faecal-related disease burden and inadequate infrastructure suggests that investment in expanding sanitation access in densely populated urban slums can yield important public health gains. No rigorous, controlled intervention studi…	Brown J., Cumming O., Bartram J., Cairncross S., Ensink J., Holcomb D., Knee J., Kolsky P., Liang K., Liang S., Nala R., Norman G., Rheingans R., Stewart J., Zavale O., Zuin V., Schmidt W.-P.	A controlled, before-and-after trial of an urban sanitation intervention to reduce enteric infections in children: Research protocol for the Maputo Sanitation (MapSan) study, Mozambique	2015	BMJ Open	10.1136/bmjopen-2015-008215		Scopus
	n	y	y	y		Introduction: Parks provide opportunities for physical activity for children. This study examined sex differences in correlates of park-based physical activity because differences may indicate that a standard environmental intervention to increase activity among children may not equally benefit boys and girls. Methods: The System for Observation Play and Recreation in Communities was used to meas…	Bocarro J.N., Floyd M.F., Smith W.R., Edwards M.B., Schultz C.L., Baran P., Moore R.A., Cosco N., Suau L.J.	Social and environmental factors related to boys' and girls' park-based physical activity	2015	Preventing Chronic Disease	10.5888/pcd12.140532		Scopus
	n	y	y	y		Background: Green spaces have been associated with improved mental health in children; however, available epidemiological evidence on their impact on child behavioral development is scarce.OobBjectives: We investigated the impact of contact with green spaces and blue spaces (beaches) on indicators of behavioral development and symptoms of attention deficit/hyperactivity disorder (ADHD) in schoolc…	Amoly E., Dadvand P., Forns J., López-Vicente M., Basagaña X., Julvez J., Alvarez-Pedrerol M., Nieuwenhuijsen M.J., Sunyer J.	Green and blue spaces and behavioral development in barcelona schoolchildren: The BREATHE project	2015	Environmental Health Perspectives	10.1289/ehp.1408215		Scopus
	n	n	y	y		In theory, improving low-income families’ housing and neighborhoods could also improve their children’s health, through any number of mechanisms. For example, less exposure to environmental toxins could prevent diseases such as asthma; a safer, less violent neighborhood could improve health by reducing the chances of injury and death, and by easing the burden of stress; and a more walkable neighb…	Ellen I.G., Glied S.	Housing, neighborhoods, and children’s health	2015	Future of Children	10.1353/foc.2015.0006		Scopus
	n	n	n	n		Background: Little is understood about childhood traumatic brain injury (TBI) and lifetime violent crime perpetration. Objectives: The purpose was to evaluate TBI before the age of 15 years and other childhood environmental factors, mental health, and lifetime history of committing a violent crime. Methods: A cross-sectional study of 636male and female offenders from a southeastern state prison p…	Brewer-Smyth K., Cornelius M.E., Pickelsimer E.E.	Childhood adversity, mental health, and violent crime	2015	Journal of Forensic Nursing	10.1097/JFN.0000000000000062	Behavior; brain; brain injuries; child abuse; child adversity; neighborhood; sexual abuse; TBI; trauma; violence	Scopus
	y	y	y	y		Changes to social and environmental contexts impact on children’s opportunities for and the nature of outdoor play in many ways. A number of studies over the past decade have noted a trend towards over-protective parenting practices that restrict children’s activities and limit children’s independent mobility and engagement with their neighbourhoods. Through semi-structured interviews with mother…	Little H.	Mothers’ beliefs about risk and risk-taking in children’s outdoor play	2015	Journal of Adventure Education and Outdoor Learning	10.1080/14729679.2013.842178	Australia; child development; early childhood; outdoor environments; parenting	Scopus
	n	n	n	n		Restrictions on outdoor smoking are increasingly common, especially for spaces associated with children. In Canada, playground smoking bans are in effect in 102 municipalities. A survey of parents and caregivers at three playgrounds in neighbourhoods of varying income levels was undertaken in Edmonton, Alberta in July 2013. Respondents expressed very strong support for smokefree playgrounds, info…	McIntosh A.H., Collins D., Parsons M.	'A place for healthy activity': Parent and caregiver perspectives on smokefree playgrounds	2015	Health and Place	10.1016/j.healthplace.2014.11.011	Canada; Playgrounds; Secondhand smoke; Smoking bans; Survey	Scopus
	n	n	y	n		BACKGROUND AND OBJECTIVES: The neighborhoods in which children live, play, and eat provide an environmental context that may influence obesity risk and ameliorate or exacerbate health disparities. The current study examines whether neighborhood characteristics predict obesity in a prospective cohort of girls. METHODS: Participants were 174 girls (aged 8-10 years at baseline), a subset from the Co…	Hoyt L.T., Kushi L.H., Leung C.W., Nickleach D.C., Adler N., Laraia B.A., Hiatt R.A., Yen I.H.	Neighborhood influences on girls' obesity risk across the transition to adolescence	2014	Pediatrics	10.1542/peds.2014-1286	Adolescent development; Neighborhood; Obesity	Scopus
	n	n	y	y		Parks can play an important role in youth activity. This study used observational data to evaluate the relationship of environmental and social determinants to youth physical activity intensity levels in Las Vegas neighborhood parks. System for observing play and leisure activity in youth was used to code activity levels as sedentary, walking, or vigorous in five low-income and five high-income p…	Coughenour C., Coker L., Bungum T.J.	Environmental and Social Determinants of Youth Physical Activity Intensity Levels at Neighborhood Parks in Las Vegas, NV	2014	Journal of Community Health	10.1007/s10900-014-9856-4	Built environment; Childhood obesity; Moderate; Urban planning; Vigorous	Scopus
	n	n	n	n		ABSTRACT: Organophosphate pesticides (OPs) are widely used in agricultural sectors in Thailand. Previous studies have documented that children residing in agricultural areas have higher exposure to OPs than children living in other residential areas. The objective of this study was to quantify urinary biomarkers of OP exposure and determine the environmental conditions and activities that predict…	Rohitrattana J., Siriwong W., Tunsaringkarn T., Panuwet P., Ryan P.B., Barr D.B., Robson M.G., Fiedler N.	Organophosphate Pesticide Exposure in School-Aged Children Living in Rice and Aquacultural Farming Regions of Thailand	2014	Journal of Agromedicine	10.1080/1059924X.2014.947457	3,5,6-trichloro-2-pyridinol (TCPy); Activity; children; dialkylphosphates (DAPs); environment; organophosphate pesticides (OPs)	Scopus
	n	n	n	n		Sugar-sweetened beverages (SSBs) are widely available, discounted and promoted, and despite recommendations to the contrary, frequently consumed by children. They provide few nutritional benefits, and their consumption is implicated in a number of poor health outcomes. This study examined the nature of the beverages that sport-playing New Zealand (NZ) children associate with sport. It assessed ho…	Smith M., Jenkin G., Signal L., McLean R.	Consuming calories and creating cavities: Beverages NZ children associate with sport	2014	Appetite	10.1016/j.appet.2014.06.015	Beverages; Children's sport; Food environment; Food policy; Nutrition	Scopus
	y	n	n	n		Background: Many characteristics of urban parks and neighbourhoods have been linked to patterns of physical activity, yet untangling these relationships to promote increased levels of physical activity presents methodological challenges. Based on qualitative and quantitative data, this article describes patterns of activity within urban parks and the socio-demographic characteristics of park visi…	McCormack G.R., Rock M., Swanson K., Burton L., Massolo A.	Physical activity patterns in urban neighbourhood parks: Insights from a multiple case study	2014	BMC Public Health	10.1186/1471-2458-14-962		Scopus
	n	n	y	n		Children function within multiple socio-environmental contexts including family, school, and neighborhood. The role each of these contexts play in determining well-being is dynamic and changes throughout early-middle childhood. Recent literature on neighborhood context and health suggests that the life-course processes involved in building trajectories of health are not adequately captured in cro…	Root E.D., Humphrey J.L.	Neighborhood racial composition and trajectories of child self-rated health: An application of longitudinal propensity scores	2014	Social Science and Medicine	10.1016/j.socscimed.2014.09.006	Child self-rated health; Developmental ecologies; Longitudinal; Neighborhood racial composition; Propensity scores; United States	Scopus
	n	y	y	y		Aim This study aims to investigate if maternal influences are associated with children's outdoor playtime and screen time at the age of 2 years. Methods A cross-sectional study with 497 first-time mothers and their children was conducted using the data from the Healthy Beginnings Trial undertaken in Sydney, Australia during 2007-2010. Maternal influences included their own physical activity and s…	Xu H., Wen L.M., Rissel C.	Associations of maternal influences with outdoor play and screen time of two-year-olds: Findings from the Healthy Beginnings Trial	2014	Journal of Paediatrics and Child Health	10.1111/jpc.12604	maternal influence; outdoor play; parental self-efficacy; parenting style; perceived environment; screen time	Scopus
	n	n	y	n		Background: Screen-viewing is one of the most common sedentary behaviors among preschoolers. Despite the high prevalence of sedentary behaviors in childcare, little research exists on the context and/or type of activities that account for these particular behaviors. Accordingly, if the amount of screen-viewing accumulated by preschoolers in childcare is not considered, researchers may be underest…	Vanderloo L.M.	Screen-viewing among preschoolers in childcare: A systematic review	2014	BMC Pediatrics	10.1186/1471-2431-14-205	Childcare; Preschool-aged children; Screen-viewing; Sedentary behavior	Scopus
	n	n	y	n		Background: The purpose of this study was to determine how proximal (home) and distal (neighborhood) environmental characteristics interact to influence obesity in early and middle adolescents.Methods: This was a descriptive, cross-sectional study using the 2007 National Survey of Children's Health (NCSH). Participants were 39,542 children ages 11 to 17 years. Logistic regressions were used to ex…	Nesbit K.C., Kolobe T.A., Arnold S.H., Sisson S.B., Anderson M.P.	Proximal and distal environmental correlates of adolescent obesity	2014	Journal of Physical Activity and Health	10.1123/jpah.2012-0245	Neighborhood characteristics; Pediatrics; Sedentary behavior	Scopus
	y	n	y	y		Background: Latino children are at high risk of becoming obese. Physical activity (PA) can help prevent obesity. Parents can influence children's PA through parenting practices. This study aimed to examine the independent contributions of (1) sociodemographic, (2) cultural, (3) parent perceived environmental, and (4) objectively measured environmental factors, to PA parenting practices. Methods. …	O'Connor T.M., Cerin E., Lee R.E., Parker N., Chen T.-A., Hughes S.O., Mendoza J.A., Baranowski T.	Environmental and cultural correlates of physical activity parenting practices among Latino parents with preschool-aged children: Niños Activos	2014	BMC Public Health	10.1186/1471-2458-14-707	Acculturation; Child; Correlates; Environment; Latio; Neighborhood; Parenting; Physical activity	Scopus
	n	n	n	n		This article presents knowledge about adversity and the changing nature of families in early modern townships. It proposes that the shape of the family changed across Nantwich (Cheshire) townships with some neighborhoods presenting very high numbers of female heads of household. While stressing variations, it presents new evidence on the subject of close family relationships. It puts forward the …	O'Brien K.	Companions of heart and hearth: Hardship and the changing structure of the family in early modern english townships	2014	Journal of Family History	10.1177/0363199014532413	Charity; Early modern; Families; Hardship; Poverty; Relationships; Wealth; Women	Scopus
	y	y	n	y		Background: Modifying the built environment by improving parks is potentially a sustainable way to increase population level physical activity. Despite considerable investment in parks and park renovations, few natural experiments on the impact of improving amenities on park use and park-based physical activity have been conducted. REVAMP is a natural experiment that aims to examine whether park …	Veitch J., Salmon J., Carver A., Timperio A., Crawford D., Fletcher E., Giles-Corti B.	A natural experiment to examine the impact of park renewal on park-use and park-based physical activity in a disadvantaged neighbourhood: The REVAMP study methods	2014	BMC Public Health	10.1186/1471-2458-14-600	Natural experiment; Park refurbishment; Park use; Physical activity	Scopus
	n	y	y	y		Background: Biologically plausible mechanisms link traffic-related air pollution to metabolic disorders and potentially to obesity. Here we sought to determine whether traffic density and traffic-related air pollution were positively associated with growth in body mass index (BMI = kg/m2) in children aged 5-11 years. Methods. Participants were drawn from a prospective cohort of children who lived…	Jerrett M., McConnell R., Wolch J., Chang R., Lam C., Dunton G., Gilliland F., Lurmann F., Islam T., Berhane K.	Traffic-related air pollution and obesity formation in children: A longitudinal, multilevel analysis	2014	Environmental Health: A Global Access Science Source	10.1186/1476-069X-13-49	Air pollution; California; Childhood obesity; Traffic	Scopus
	n	n	n	n		Background: Parks are important for providing opportunities for physical activity among youth. Apart from engaging in physical activity whilst visiting a park, active transportation (e.g. walking or cycling) to parks is potentially an additional source of physical activity. Previous research has shown that a major barrier to young people visiting parks is their inability to visit parks unaccompan…	Veitch J., Carver A., Hume C., Crawford D., Timperio A., Ball K., Salmon J.	Are independent mobility and territorial range associated with park visitation among youth?	2014	International Journal of Behavioral Nutrition and Physical Activity	10.1186/1479-5868-11-73	Active transport; Adolescents; Independent mobility; Park visitation; Territorial range; Youth	Scopus
	y	n	y	y		This paper argues that highlighting the enjoyment or fun aspects of children's experiences can also encourage walking to school. It seeks to identify and understand the neighbourhood attributes contributing to an enjoyable walk to school from the perspectives of children. A group of 178 children (9-11 years old) was drawn from eight government primary schools situated in Sydney metropolitan neigh…	Romero V.	Children's experiences: Enjoyment and fun as additional encouragement for walking to school	2014	Journal of Transport and Health	10.1016/j.jth.2015.01.002	Children's experiences; Fun; Neighbourhood; Walk to school	Scopus
	n	n	n	n		Background: In Canada, First Nations women are far less likely to breastfeed than other women. First Nations people have been subjected to massive health and social disparities and are at the lowest end of the scale on every measure of well-being. The purpose of this study is to understand the experiences, strengths, and challenges of breastfeeding for First Nations women. Central to the current …	Eni R., Phillips-Beck W., Mehta P.	At the edges of embodiment: Determinants of breastfeeding for first nations women	2014	Breastfeeding Medicine	10.1089/bfm.2013.0129		Scopus
	n	n	n	n		Background: Sub-Saharan Africa is home to approximately 55 million orphaned children. The growing orphan crisis has overwhelmed many communities and has weakened the ability of extended families to meet traditional care-taking expectations. Other models of care and support have emerged in sub-Saharan Africa to address the growing orphan crisis, yet there is a lack of information on these models a…	Embleton L., Ayuku D., Kamanda A., Atwoli L., Ayaya S., Vreeman R., Nyandiko W., Gisore P., Koech J., Braitstein P.	Models of care for orphaned and separated children and upholding children's rights: Cross-sectional evidence from western Kenya	2014	BMC International Health and Human Rights	10.1186/1472-698X-14-9	Children's rights; Kenya; Orphans; Street children; Sub-saharan africa; Vulnerable children	Scopus
	n	n	y	n		Evidence of the impact of exposure to low levels of lead on children's health is increasing. Residential floor dust is the assumed origin of lead exposure by young children. In this study, we estimate the contribution of different lead sources to household interior floor dust contamination. We also estimate the within-home variability of interior floor dust lead loadings. A multilevel model was d…	Lucas J.-P., Bellanger L., Le Strat Y., Le Tertre A., Glorennec P., Le Bot B., Etchevers A., Mandin C., Sébille V.	Source contributions of lead in residential floor dust and within-home variability of dust lead loading	2014	Science of the Total Environment	10.1016/j.scitotenv.2013.10.028	Exposure; House dust; Lead; Multilevel modeling	Scopus
	n	y	y	y		Background: To develop evidence-based interventions promoting healthy active lifestyles among young children and their parents, a greater understanding is needed of the correlates of physical activity and screen time in these dyads. Physical environment features within neighborhoods may have important influences on both children and their parents. The purpose of this study was to examine the asso…	Carson V., Rosu A., Janssen I.	A cross-sectional study of the environment, physical activity, and screen time among young children and their parents	2014	BMC Public Health	10.1186/1471-2458-14-61	Child; Parents; Physical activity; Physical environment; Preschool; Screen time	Scopus
	n	n	y	n		Complex relationships exist between eating behaviour and personal and environmental factors. Rural and urban geographic contexts seem to play a role in eating behaviour, and therefore deserve a deeper study. A healthy eating behaviour and the conditions that promote it are a major issue in the promotion of adolescent health. The study aims to investigate the associations between the area of resid…	Gaspar T., de Matos M.G., Luszczynska A., Baban A., Wit J.	The impact of a rural or urban context in eating awareness and self-regulation strategies in children and adolescents from eight European countries	2014	International Journal of Psychology	10.1002/ijop.12046	Children/adolescents; Eating awareness/care; Eating behaviour; Rural/urban area; Self-regulation	Scopus
	n	n	n	n		Background: Tuberculosis is a major disease worldwide and most research focus on risk factors for adults, although there is a marked adolescent peak in incidence. The objective of this study was to identify risk factors for tuberculosis in children aged 7 to 19. Methods: A case control study matched by age with 169 cases and 477 controls. The study population consisted of adolescents and older ch…	Stevens H., Ximenes R.A.A., Dantas O.M.S., Rodrigues L.C.	Risk factors for tuberculosis in older children and adolescents: A matched case-control study in Recife, Brazil	2014	Emerging Themes in Epidemiology	10.1186/s12982-014-0020-5	Adolescents; Household contacts; Risk factors; Smoking; Socio-economic factors; Tuberculosis	Scopus
	n	n	y	y		This study investigates the relationship between concentrations of on- and off-premises alcohol outlets and rates of child abuse and neglect. Additionally, the study seeks to locate protective features of a neighborhood's built environment by investigating the potentially moderating role that access to substance abuse treatment and prevention services plays in the relationship between alcohol out…	Morton C.M., Simmel C., Peterson N.A.	Neighborhood alcohol outlet density and rates of child abuse and neglect: Moderating effects of access to substance abuse services	2014	Child Abuse and Neglect	10.1016/j.chiabu.2014.01.002	Alcohol outlets; Built environment; Child abuse; Child neglect; Prevention	Scopus
	n	n	n	n		Background: Pyrethroid insecticides (PYR) are commonly used in rice farms and household pest control in Thailand. No investigative study has yet been made regarding factors associated with PYR exposure among Thai children.Results and discussion: The concentrations of urinary PYR metabolites were not significantly different between participants who lived in rice farming and those who lived in aqua…	Rohitrattana J., Siriwong W., Robson M., Panuwet P., Barr D.B., Fiedler N.	Pyrethroid insecticide exposure in school-aged children living in rice and aquacultural farming regions of thailand	2014	Risk Management and Healthcare Policy	10.2147/RMHP.S67208	2-dichlorovinyl)-2; 2-dimethylcyclopropane carboxylic acid; 3-PBA; 3-phenoxybenzoic acid; Activity; Child health; Cis/trans-3-(2; DCCA; Environment; PYR; Pyrethroid insecticide	Scopus
	n	y	y	n		Background: Children's physical activity (PA) is affected by socio-economic status (SES) and the environment. Children are not fully autonomous in their decision making; parental decisions thus affect how children utilise their surrounding environments for PA. The aim was to examine environmental influences on children's PA from a qualitative perspective in parents from low SES wards in Coventry,…	Eyre E.L.J., Duncan M.J., Birch S.L., Cox V.M.	Low socio-economic environmental determinants of children's physical activity in Coventry, UK: A Qualitative study in parents	2014	Preventive Medicine Reports	10.1016/j.pmedr.2014.09.002	Attitude; Deprived; Habitual physical activity; Neighbourhood; Play; Youth	Scopus
	n	y	y	y		Although repeated contact with nature helps foster mental and physical health among young people, their contact with nature has been diminishing over the last few decades. Also, low-income and ethnic minority children have even less contact with nature than white middle-income children. In this study, we compared accessibility to play in parks for young people from different income and racial bac…	Rigolon A., Flohr T.L.	Access to parks for youth as an environmental justice issue: Access inequalities and possible solutions	2014	Buildings	10.3390/buildings4020069	Access to play; Environmental justice; Geographic information systems; Park accessibility; Young people	Scopus
	y	n	n	y		Physical activity levels among adolescents decline during their teenage years and into early adulthood. Socio-economic background plays an important role in adolescents’ physical activity, as children from rural communities participate less regularly in physical activities due to a lack of access to facilities, the cost of programmes and in general due to limited facilities. The focus of public h…	van den Berg L., Grobler W.C.J.	The influence of access to facilities on the physical activity level of high school pupils in Bophelong, A semi-urban area of South Africa	2014	Mediterranean Journal of Social Sciences	10.5901/mjss.2014.v5n23p905	Accessibility; Facilities; Physical activity; Semi-urban area	Scopus
	n	n	n	n		Studies were carried out on the occurrence of superficial fungal infections amongst some occupational groups in Nigeria. The occupational groups investigated included car-washers, dog breeders, local farmers, football players, hair-dressers and urban road-cleaners. The study was also extended to HIV/ AIDS patients. A total number of 13 species of fungi were isolated from both the occupational gro…	Ogbonna A.I., Ogbonna C.I.C., Ogueri S.C., Nwadiaro R., Ishaku H.L.	Superficial fungal infections amongst some occupational groups and HIV/AIDS patients in Nigeria	2014	Asian Journal of Microbiology, Biotechnology and Environmental Sciences		Epidermophyton sp; Fungi infections; HIV/AIDS; Occupational groups dermatophytes	Scopus
	n	n	y	y		Objective: Dog ownership is positively associated with children's physical activity. It is plausible that dog-facilitated activity rather than dog ownership per se encourages children's physical activity behaviors. We examined relationships between dog walking and children's physical activity, and outdoor play and independent mobility. Method: Cross-sectional survey data from the 2007 Perth (West…	Christian H., Trapp G., Villanueva K., Zubrick S.R., Koekemoer R., Giles-Corti B.	Dog walking is associated with more outdoor play and independent mobility for children	2014	Preventive Medicine	10.1016/j.ypmed.2014.08.002	Child; Dog; Independent mobility; Physical activity; Play; Walking	Scopus
	n	n	n	n		Background Researchers have historically reported that farm children have a lower prevalence of asthma compared to more urban children. Potential explanations include theories surrounding differences in personal factors, access to health care, engagement in health risk behaviors, and differences in the environment. Objective The aims of this study were to: (1) confirm whether the prevalence of as…	Barry R.J., Pickett W., Rennie D.C., Dosman J.A., Pahwa P., Hagel L., Karunanayake C., Lawson J.A.	The role of farm operational and rural environments as potential risk factors for pediatric asthma in rural Saskatchewan	2014	Pediatric Pulmonology	10.1002/ppul.22903	farm activities; pediatric asthma; respiratory illness; rural health	Scopus
非英语	y	y	y	y		Nowadays, children's play culture has changed. Over the last few decades, in Buenos Aires City, there have been many changes in play settings, which lead children to carry out activities in private or semi-public environments, modifying the way in which they play. Children's play, understood as a space where children formerly trained their different skills, is being increasingly influenced by new…	Stefani G., Andrés L., Oanes E.	Playful transformations. A preliminary study on type of play and type of setting [Transformaciones lúdicas. Un estudio preliminar sobre tipos de juego y espacios lúdicos]	2014	Interdisciplinaria		Cross-generational change; Play; Play culture; Play settings; Transformations	Scopus
	n	n	n	n		This study explored the role of relative quantity of green space in urban English neighbourhoods in predicting parent-reported emotional and behavioural problems from early to middle childhood (ages 3, 5, 7) and in buffering the effects of multiple risk factors (neighbourhood disadvantage, family poverty and adverse life events) on child adjustment. We modelled data from 6384 Millennium Cohort St…	Flouri E., Midouhas E., Joshi H.	The role of urban neighbourhood green space in children's emotional and behavioural resilience	2014	Journal of Environmental Psychology	10.1016/j.jenvp.2014.06.007	Emotional and behavioural problems; Green space; Millennium Cohort Study; Neighbourhoods; Socio-economic disadvantage	Scopus
	n	n	y	y		Avondale, a disadvantaged neighborhood in Cincinnati, lags behind on a number of indicators of child well-being. Childhood obesity has become increasingly prevalent, as one-third of Avondale's kindergarteners are obese or overweight. The study objective was to determine perceptions of the quantity of and obstacles to childhood physical activity in the Avondale community. Caregivers of children fr…	Kottyan G., Kottyan L., Edwards N.M., Unaka N.I.	Assessment of active play, inactivity and perceived barriers in an inner city neighborhood	2014	Journal of Community Health	10.1007/s10900-013-9794-6	5-2-1-0; Advocacy; Community engagement; Physical activity	Scopus
	y	y	n	y		The issue of accessibility to urban greenspaces is raising as one of the most debated in sustainable urban planning, especially in topics such as environmental justice and health inequalities. This is mainly due to the growing attention that is recognised today to health and well-being benefits from greenspaces. Different people interpret accessibility based on their individual needs and prioriti…	La Rosa D.	Accessibility to greenspaces: GIS based indicators for sustainable planning in a dense urban context	2014	Ecological Indicators	10.1016/j.ecolind.2013.11.011	Accessibility; GIS; Greenspaces; Indicators; Urban planning	Scopus
	n	n	y	n		A growing body of evidence demonstrates that alterations in individual behaviors alone are not sufficient to change the course of the enduring public health epidemics such as childhood obesity. Instead, environmental factors that influence what, when, where, and how much people eat and drink and how physically active they are must be addressed at a population scale to promote healthy behaviors. U…	Botchwey N.D., Trowbridge M., Fisher T.	Green Health: Urban Planning and the Development of Healthy and Sustainable Neighborhoods and Schools	2014	Journal of Planning Education and Research	10.1177/0739456X14531830	community development; environment; neighborhood planning; public health	Scopus
[truncated: 44 more rows]

## Sheet: stage2
备注	environment	play	child	neighbourhood	duplicated	abstract	title	year	publication	number of citations	DOI	key words	Document type	来源出版物
[truncated: 67 more rows]

## Sheet: Sheet1
country	Notes	critical notes	Research questions	Theory	Method	IV	DV	Moderator or mediator	age	finding	Title	Abstract	Year	Publication
[truncated: 66 more rows]

## Sheet: 最终55个
序号	Title	Year	类别	country	Notes	critical notes	Research questions or objectives		Theory	定量/定性	Method	IV	DV	Moderator or mediator	age	finding	Game type	Environment type and characteristics	Abstract	Publication
[truncated: 68 more rows]

[truncated: 3 more sheets: 理论表格, 方法表格, 55篇按顺序排列的APA]
