# Supplementary material for: Neighbourhood physical environment influences on children’s outdoor play: a systematic review
Source: Frontiers journal article supplement (doi:10.3389/fbuil.2023.1193309), 2023-06-27
Supplement: Table_1.docx [file Table_1.docx]

**Appendix 1. Final included Articles**

| **#** | **Articles** |
| --- | --- |
| 1 | Ergler, C. R., Kearns, R. A., & Witten, K. (2013). Seasonal and locational variations in children's play: Implications for well-being. Social Science and Medicine, 91, 178–185. https://doi.org/10.1016/j.socscimed.2012.11.034 |
| 2 | D’Haese, S., Van Dyck, D., De Bourdeaudhuij, I., Deforche, B., & Cardon, G. (2015). Organising "Play Streets" during school vacations can increase physical activity and decrease sedentary time in children. International Journal of Behavioral Nutrition and Physical Activity, 12(1), 1–9. https://doi.org/10.1186/s12966-015-0171-y |
| 3 | Ismail, N. A., Safiullah, S. Bin, Yunos, M. Y. M., Utaberta, N., & Ismail, S. (2015). Identifying natural playscape elements in a neighbourhood park: A case study of Kuantan, Malaysia. *Advances in Environmental Biology*, *9*(5), 504–513. |
| 4 | Roberts, J. D., Ray, R., Biles, A. D., Knight, B., & Saelens, B. E. (2015). Built environment and active play among Washington DC metropolitan children: A protocol for a cross-sectional study. Archives of Public Health, 73(1), 1–11. https://doi.org/10.1186/s13690-015-0070-3 |
| 5 | Janssen, I., & King, N. (2015). Health & place Walkable school neighborhoods are not playable neighborhoods. *Health & Place*, *35*, 66–69. https://doi.org/10.1016/j.healthplace.2015.07.004 |
| 6 | Little, H. (2015). *Journal of Adventure Education and Mothers' beliefs about risk and risk- taking in children' s outdoor play*. *January*, 37–41. https://doi.org/10.1080/14729679.2013.842178 |
| 7 | Mansor, M., Mansor, M., Man, S. I. C., & Ismail, I. A. (2016). Urban children's familiarity and feeling towards nearby nature. *Advanced Science Letters*, *22*(12), 4090–4094. https://doi.org/10.1166/asl.2016.8101 |
| 8 | Zieff, S. G., Chaudhuri, A., & Musselman, E. (2016). Creating neighborhood recreational space for youth and children in the urban environment: Play(ing in the) Streets in San Francisco. *Children and Youth Services Review*, *70*, 95–101. https://doi.org/10.1016/j.childyouth.2016.09.014 |
| 9 | Loebach, J., & Gilliland, J. (2016). *Children' s Geographies Neighbourhood play on the endangered list : examining patterns in children' s local activity and mobility using GPS monitoring and qualitative GIS*. *3285*(March). https://doi.org/10.1080/14733285.2016.1140126 |
| 10 | Gundersen, V., Skår, M., O'Brien, L., Wold, L. C., & Follo, G. (2016). Children and nearby nature: A nationwide parental survey from Norway. *Urban Forestry and Urban Greening*, *17*, 116–125. https://doi.org/10.1016/j.ufug.2016.04.002 |
| 11 | Bartie, M., Dunnell, A., Kaplan, J., Oosthuizen, D., Smit, D., van Dyk, A., Cloete, L., & Duvenage, M. (2016). The Play Experiences of Preschool Children from a Low-socio-economic Rural Community in Worcester, South Africa. *Occupational Therapy International*, *23*(2), 91–102. https://doi.org/10.1002/oti.1404 |
| 12 | Roberts, J. D., Knight, B., Ray, R., & Saelens, B. E. (2016). Parental perceived built environment measures and active play in Washington DC metropolitan children. *Preventive Medicine Reports*, *3*, 373–378. https://doi.org/10.1016/j.pmedr.2016.04.001 |
| 13 | Oke, A., & Middle, G. J. (2016). Planning Playgrounds to Facilitate Children's Pretend Play: A Case Study of New Suburbs in Perth Western Australia. *Planning Practice and Research*, *31*(1), 99–117. https://doi.org/10.1080/02697459.2015.1081336 |
| 14 | Monsur, M., Mansur, M., & Islam, M. Z. (2017). Are children living on dead-end streets more active? Near-home street patterns and school-going children's time spent outdoors in Dhaka, Bangladesh. *Preventive Medicine*, *103*, S73–S80. https://doi.org/10.1016/j.ypmed.2016.11.016 |
| 15 | Wang, F., Ruan, H., Chieh Wang, H., Zong, Y., & Zhen, F. (2017). Create, control and have territories or secret places: A comparative study of children's play territoriality in their daily outdoor environments between Beijing's urban villages and modern residential areas. *Habitat International*, *66*, 125–134. https://doi.org/10.1016/j.habitatint.2017.05.012 |
| 16 | Cortinez-O’Ryan, A., Albagli, A., Sadarangani, K. P., & Aguilar-Farias, N. (2017). Reclaiming streets for outdoor play: A process and impact evaluation of "Juega en tu Barrio" (Play in your Neighborhood), an intervention to increase physical activity and opportunities for play. *PLoS ONE*, *12*(7), 1–17. https://doi.org/10.1371/journal.pone.0180172 |
| 17 | French, S. A., Sherwood, N. E., Mitchell, N. R., & Fan, Y. (2017). Park use is associated with less sedentary time among low-income parents and their preschool child: The NET-Works study. *Preventive Medicine Reports*, *5*, 7–12. https://doi.org/10.1016/j.pmedr.2016.11.003 |
| 18 | Timperio, A., Crawford, D., Ball, K., & Salmon, J. (2017). Typologies of neighbourhood environments and children's physical activity, sedentary time and television viewing. *Health and Place*, *43*(June 2016), 121–127. https://doi.org/10.1016/j.healthplace.2016.10.004 |
| 19 | Çubukçu, E., Kahraman, D. E., & Yavaşal, Ö. F. (2018). Comparing the lifestyles and environmental perceptions of rural and urban children: a case study in Turkey. *Journal of Housing and the Built Environment*, *33*(4), 861–875. https://doi.org/10.1007/s10901-018-9594-5 |
| 20 | Holloway, S. L., & Pimlott-Wilson, H. (2018). Reconceptualising play: Balancing childcare, extra-curricular activities and free play in contemporary childhoods. *Transactions of the Institute of British Geographers*, *43*(3), 420–434. https://doi.org/10.1111/tran.12230 |
| 21 | Ryan, R., Hosking, J., Wilkinson-Meyers, L., & Ameratunga, S. (2018). Children's perceptions of a 'self-explaining road' intervention to improve neighbourhood safety. *Journal of Paediatrics and Child Health*, *54*(4), 365–369. https://doi.org/10.1111/jpc.13776 |
| 22 | Zeng, R., & Li, Z. (2018). Analysis of the relationship between landscape and children's behaviour in Chinese residential quarters. *Journal of Asian Architecture and Building Engineering*, *17*(1), 47–54. https://doi.org/10.3130/jaabe.17.47 |
| 23 | Hayball, F., McCrorie, P., Kirk, A., Gibson, A. M., & Ellaway, A. (2018). Exploring Children's Perceptions of their Local Environment in Relation to Time Spent Outside. *Children and Society*, *32*(1), 14–26. https://doi.org/10.1111/chso.12217 |
| 24 | Buck, C., Eiben, G., Lauria, F., Konstabel, K., Page, A., Ahrens, W., & Pigeot, I. (2019). Urban Moveability and physical activity in children: Longitudinal results from the IDEFICS and I.Family cohort. *International Journal of Behavioral Nutrition and Physical Activity*, *16*(1), 1–13. https://doi.org/10.1186/s12966-019-0886-2 |
| 25 | Nordbø, E. C. A., Raanaas, R. K., Nordh, H., & Aamodt, G. (2019). Neighborhood green spaces, facilities and population density as predictors of activity participation among 8-year-olds: a cross-sectional GIS study based on the Norwegian mother and child cohort study. *BMC Public Health*, *19*(1), 1426. https://doi.org/10.1186/s12889-019-7795-9 |
| 26 | Kepper, M. M., Staiano, A. E., Katzmarzyk, P. T., Reis, R. S., Eyler, A. A., Gri, D. M., Kendall, M. L., Elbanna, B., Denstel, K. D., & Broyles, S. T. (2019). *Neighborhood Influences on Women' s Parenting Practices for Adolescents' Outdoor Play : A Qualitative Study*. 1–16. |
| 27 | Washington, T. L., Cushing, D. F., Mackenzie, J., Buys, L., & Trost, S. (2019). Fostering social sustainability through intergenerational engagement in Australian neighborhood parks. *Sustainability (Switzerland)*, *11*(16), 1–16. https://doi.org/10.3390/su11164435 |
| 28 | Yoon, J., & Lee, C. (2019). Neighborhood outdoor play of White and Non-White Hispanic children: Cultural differences and environmental disparities. *Landscape and Urban Planning*, *187*(February 2018), 11–22. https://doi.org/10.1016/j.landurbplan.2019.01.010 |
| 29 | Li, C., & Seymour, M. (2019). Children's perceptions of neighbourhood environments for walking and outdoor play. *Landscape Research*, *44*(4), 430–443. https://doi.org/10.1080/01426397.2018.1460336 |
| 30 | Furneaux, A., & Manaugh, K. (2019). Eyes on the alley: children's appropriation of alley space in Riverdale, Toronto. *Children's Geographies*, *17*(2), 204–216. https://doi.org/10.1080/14733285.2018.1482409 |
| 31 | Allport, T., Mace, J., Farah, F., Yusuf, F., Mahdjoubi, L., & Redwood, S. (2019). 'Like a life in a cage': Understanding child play and social interaction in Somali refugee families in the UK. *Health and Place*, *56*(January), 191–201. https://doi.org/10.1016/j.healthplace.2019.01.019 |
| 32 | Pedroni, C., Dujeu, M., Moreau, N., Lebacq, T., Méroc, E., Godin, I., & Castetbon, K. (2019). Environmental correlates of physical activity among children 10 to 13 years old in Wallonia (Belgium). *BMC Public Health*, *19*(1), 1–12. https://doi.org/10.1186/s12889-019-6509-7 |
| 33 | Lai, P. C., & Low, C. T. (2019). Provision of convenient play space in a densely populated city. *International Journal of Environmental Research and Public Health*, *16*(4). https://doi.org/10.3390/ijerph16040651 |
| 34 | Loebach, J., & Gilliland, J. (2019). Examining the Social and Built Environment Factors Influencing Children's Independent Use of Their Neighborhoods and the Experience of Local Settings as Child-Friendly. *Journal of Planning Education and Research*, *August 2016*. https://doi.org/10.1177/0739456X19828444 |
| 35 | Hnatiuk, J. A., Dwyer, G., George, E. S., & Bennie, A. (2020). Co-participation in physical activity: Perspectives from Australian parents of pre-schoolers. *Health Promotion International*, *35*(6), 1474–1483. https://doi.org/10.1093/heapro/daaa022 |
| 36 | Oscilowicz, E., Honey-Rosés, J., Anguelovski, I., Triguero-Mas, M., & Cole, H. (2020). Young families and children in gentrifying neighbourhoods: how gentrification reshapes use and perception of green play spaces. *Local Environment*, *25*(10), 765–786. https://doi.org/10.1080/13549839.2020.1835849 |
| 37 | Ross, A., Wood, L., & Searle, M. (2020). The indirect influence of child play on the association between parent perceptions of the neighborhood environment and sense of community. *Health and Place*, *65*(August), 102422. https://doi.org/10.1016/j.healthplace.2020.102422 |
| 38 | Brussoni, M., Lin, Y., Han, C., Janssen, I., Schuurman, N., Boyes, R., Swanlund, D., & Mâsse, L. C. (2020). A qualitative investigation of unsupervised outdoor activities for 10- to 13-year-old children: "I like adventuring but I don't like adventuring without being careful." *Journal of Environmental Psychology*, *70*(February), 101460. https://doi.org/10.1016/j.jenvp.2020.101460 |
| 39 | Wang, Q., Ma, J., Maehashi, A., & Kim, H. (2020). The associations between outdoor playtime, screen-viewing time, and environmental factors in chinese young children: The "eat, be active and sleep well" study. *International Journal of Environmental Research and Public Health*, *17*(13), 1–13. https://doi.org/10.3390/ijerph17134867 |
| 40 | Nordbø, E. C. A., Raanaas, R. K., Nordh, H., & Aamodt, G. (2020). Disentangling how the built environment relates to children's well-being: Participation in leisure activities as a mediating pathway among 8-year-olds based on the Norwegian Mother and Child Cohort Study. *Health and Place*, *64*(May). https://doi.org/10.1016/j.healthplace.2020.102360 |
| 41 | Mears, M., Brindley, P., Baxter, I., Maheswaran, R., & Jorgensen, A. (2020). Neighbourhood greenspace influences on childhood obesity in Sheffield, UK. *Pediatric Obesity*, *15*(7), 1–11. https://doi.org/10.1111/ijpo.12629 |
| 42 | Bhuyan, M. R., & Zhang, Y. (2020). A Mixed Methods Research Strategy to Study Children's Play and Urban Physical Environments in Dhaka. *Journal of Mixed Methods Research*, *14*(3), 358–378. https://doi.org/10.1177/1558689819871820 |
| 43 | Kepper, M. M., Staiano, A. E., Katzmarzyk, P. T., Reis, R. S., Eyler, A. A., Griffith, D. M., Kendall, M. L., ElBanna, B., Denstel, K. D., & Broyles, S. T. (2020). Using mixed methods to understand women's parenting practices related to their child's outdoor play and physical activity among families living in diverse neighborhood environments. *Health and place*, *62*(xxxx), 102292. https://doi.org/10.1016/j.healthplace.2020.102292 |
| 44 | Oakley, J., Peters, R. L., Wake, M., Grobler, A. C., Kerr, J. A., Lycett, K., Cassim, R., Russell, M., Sun, C., Tang, M. L. K., Koplin, J. J., & Mavoa, S. (2021). Backyard benefits? A cross-sectional study of yard size and greenness and children's physical activity and outdoor play. *BMC Public Health*, *21*(1), 1–10. https://doi.org/10.1186/s12889-021-11475-4 |
| 45 | Passmore, H. A., Martin, L., Richardson, M., White, M., Hunt, A., & Pahl, S. (2021). Parental/Guardians' Connection to Nature Better Predicts Children's Nature Connectedness than Visits or Area-Level Characteristics. *Ecopsychology*, *13*(2), 103–113. https://doi.org/10.1089/eco.2020.0033 |
| 46 | Loebach, J., Sanches, M., Jaffe, J., & Elton-Marshall, T. (2021). Paving the way for outdoor play: Examining socio-environmental barriers to community-based outdoor play. *International Journal of Environmental Research and Public Health*, *18*(7). https://doi.org/10.3390/ijerph18073617 |
| 47 | Casas, F., & Corominas, M. (2021). *Children and Youth Services Review Analysing factors for an optimum play environment through children' s subjective well-being indicators*. *122*(July 2020). https://doi.org/10.1016/j.childyouth.2020.105688 |
| 48 | Fiscella, N. A., Case, L. K., Jung, J., & Yun, J. (2021). Influence of Neighborhood Environment on Physical Activity Participation among Children with Autism Spectrum Disorder. *Autism Research*, *14*(3), 560–570. https://doi.org/10.1002/aur.2445 |
| 49 | Bao, Y., Gao, M., Luo, D., & Zhou, X. (2021). Effects of Children's Outdoor Physical Activity in the Urban Neighborhood Activity Space Environment. In *Frontiers in Public Health* (Vol. 9). https://doi.org/10.3389/fpubh.2021.631492 |
| 50 | Qiu, L., & Zhu, X. (2021). *Housing and Community Environments vs . Independent Mobility : Roles in Promoting Children' s Independent Travel and Unsupervised Outdoor Play*. |
| 51 | Ergler, C. R., Freeman, C., & Guiney, T. (2021). Walking with preschool-aged children to explore their local well-being affordances. *Geographical Research*, *59*(1), 118–135. https://doi.org/10.1111/1745-5871.12402 |
| 52 | Mottaghi, M., Kylin, M., Kopljar, S., & Sternudd, C. (2021). Blue‐green playscapes: Exploring children's places in stormwater spaces in augustenborg, malmö. *Urban Planning*, *6*(2), 175–188. https://doi.org/10.17645/up.v6i2.3953 |
| 53 | Das, R., & Banerjee, A. (2021). Identifying the parameters for assessment of child-friendliness in urban neighborhoods in Indian cities. *Journal of Urban Affairs*, *00*(00), 1–19. https://doi.org/10.1080/07352166.2020.1863815 |
| 54 | Zhang, Y., & Tamminga, K. (2022). *Interweaving Computational and Tacit Knowledge to Design Nature-Based Play Networks in Underserved Communities*. |
| 55 | Bhuyan, M. R. (2022). Geographies of outdoor play in Dhaka: an explorative study on children's location preference, usage pattern, and accessibility range of play spaces. *Children's Geographies*, *20*(1), 94–108. https://doi.org/10.1080/14733285.2021.1914823 |
